# Supplementary material for: Integrated Transcriptomics and Machine Learning Identify NALCN and KCNQ1 as Key Ion Channel Genes in Kidney Stone Pathogenesis and Potential Therapeutic Targets
Source: Research Square preprint supplement (doi:10.21203/rs.3.rs-8883107/v1), 2026-02-20
Supplement: Supplementary file 1 [file 509d23ce2c0cc9cb0a0e1330.xlsx]

## Sheet: Supplementary table 7
	Supplementary Table 5: Results of the GSEA for the NALCN
ID	Description	setSize	enrichmentScore	NES	pvalue	p.adjust	qvalue	rank	leading_edge	core_enrichment
KEGG_RIBOSOME	KEGG_RIBOSOME	87	0.746869864489166	4.29766235419753	1e-10	0.00000000167272727272727	0.000000000669856459330144	4657	tags=79%, list=15%, signal=68%	RPS29/RPS5/RPS23/RPL13/RPL34/RPL17/RPL38/RPS10/RPL12/RPL35A/RPL22L1/RPL14/RPL5/RPS25/RPL9/UBA52/RPL8/RPL11/RPL10/RPS18/RPS15/RPL15/RPS13/FAU/RPS3A/RPL7A/RPL18/RPL10A/RPLP2/RPL13A/RPL10L/RPS9/RPS20/RPL30/RPS24/RPL32/RPL3/RPL36A/RPL39/RPL18A/RPL24/RPS19/RPL23A/RPL29/RPL36AL/RPS15A/RPL21/RPL36/RPS3/RPL4/RPS28/RPL27/RPS16/RPS8/RPL26/RPS27A/RPS7/RPL37/RPLP0/RPS11/RPL19/RPL6/RPS21/RPL22/RPL7/RPL41/RPS6…
KEGG_SPLICEOSOME	KEGG_SPLICEOSOME	122	0.60634607200641	3.78352414684551	1e-10	0.00000000167272727272727	0.000000000669856459330144	9731	tags=82%, list=30%, signal=57%	TRA2B/HNRNPK/HSPA1A/PQBP1/PRPF3/SRSF3/HNRNPU/HSPA1B/NCBP1/SRSF5/SRSF4/BCAS2/DDX42/PRPF6/SNRNP70/LSM7/DHX15/U2AF2/SNRNP40/PRPF38A/CCDC12/LSM2/SNRPA/PRPF8/LSM6/THOC1/RBM25/SF3B1/SNRPD2/ISY1/SF3A3/SRSF9/CDC40/SF3A1/RBM17/SMNDC1/CHERP/LSM5/U2AF1/CWC15/RBMX/PRPF38B/SNRNP27/MAGOH/PCBP1/SNW1/TCERG1/SF3B3/PRPF18/USP39/CTNNBL1/SNRPF/XAB2/SNRPB/CRNKL1/THOC2/HNRNPA3/EIF4A3/BUD31/SRSF2/SLU7/PLRG1/SNRPD1/PUF6…
KEGG_OXIDATIVE_PHOSPHORYLATION	KEGG_OXIDATIVE_PHOSPHORYLATION	99	0.52833194627922	3.12547446361362	1e-10	0.00000000167272727272727	0.000000000669856459330144	9079	tags=72%, list=28%, signal=52%	COX4I1/UQCRH/NDUFB8/COX7A1/COX5B/COX7A2L/SDHA/UQCRC2/NDUFA10/NDUFA1/NDUFA4/NDUFB9/ATP6V1D/COX10/UQCRC1/NDUFA6/COX15/NDUFS5/NDUFA5/COX6B1/UQCRQ/NDUFS4/ATP6V1C1/NDUFB4/COX7B/NDUFB10/SDHB/NDUFA8/NDUFV2/COX7C/PPA1/NDUFC1/SDHD/UQCR10/NDUFB6/CYC1/NDUFA11/UQCR11/COX6C/NDUFAB1/NDUFS2/NDUFS1/COX8A/ATP6V0A1/ATP6V1E1/NDUFV1/ATP6V0B/COX7A2/NDUFB7/NDUFS6/ATP6V0D2/NDUFB5/NDUFB1/NDUFV3/NDUFA9/COX17/COX6A1/NDUFS…
KEGG_UBIQUITIN_MEDIATED_PROTEOLYSIS	KEGG_UBIQUITIN_MEDIATED_PROTEOLYSIS	130	0.47061465379027	2.96796986369452	1e-10	0.00000000167272727272727	0.000000000669856459330144	9276	tags=64%, list=29%, signal=46%	HERC3/DDB2/UBE2R2/UBE2O/SIAH1/UBE3B/CBLB/CDC26/ANAPC11/CUL1/TRIM32/PIAS1/FANCL/UBE2NL/UBE2K/UBE2F/UBE2H/SMURF1/BIRC6/TRAF6/SKP2/MID1/UBE2D1/UBE2E2/UBE2L3/ANAPC4/CDC34/UBE4A/UBE2E3/UBE2M/HERC1/UBA2/CBLC/CUL4B/NEDD4L/PIAS3/KEAP1/DET1/CUL2/UBE3A/CDC16/ANAPC5/WWP1/UBE2W/KLHL9/STUB1/UBE2E1/ITCH/PML/SYVN1/UBE2D3/UBE2Q1/UBE2QL1/ERCC8/UBE2D2/FBXW7/UBE4B/ANAPC10/UBE2B/SAE1/UBR5/CUL5/UBE2Q2/UBA7/TRIP12/RCH…
KEGG_PARKINSONS_DISEASE	KEGG_PARKINSONS_DISEASE	98	0.500556862199853	2.94737319723099	1e-10	0.00000000167272727272727	0.000000000669856459330144	8633	tags=72%, list=27%, signal=53%	VDAC2/SLC25A4/COX4I1/UQCRH/NDUFB8/CYCS/COX7A1/COX5B/SLC25A6/COX7A2L/SDHA/UQCRC2/NDUFA10/HTRA2/NDUFA1/NDUFA4/NDUFB9/UQCRC1/NDUFA6/UBE2L3/NDUFS5/NDUFA5/COX6B1/UQCRQ/NDUFS4/NDUFB4/SLC25A5/COX7B/NDUFB10/SDHB/NDUFA8/NDUFV2/COX7C/UBB/NDUFC1/SDHD/UQCR10/NDUFB6/CYC1/PARK7/UQCR11/COX6C/NDUFAB1/NDUFS2/NDUFS1/COX8A/PPID/NDUFV1/COX7A2/CASP9/NDUFB7/NDUFS6/VDAC3/NDUFB5/NDUFB1/PINK1/NDUFV3/NDUFA9/UBA7/COX6A1/ND…
KEGG_HUNTINGTONS_DISEASE	KEGG_HUNTINGTONS_DISEASE	158	0.447168899119289	2.93037519317666	1e-10	0.00000000167272727272727	0.000000000669856459330144	8764	tags=65%, list=27%, signal=47%	VDAC2/SLC25A4/COX4I1/UQCRH/NDUFB8/CYCS/COX7A1/COX5B/PPARG/SLC25A6/COX7A2L/SDHA/TFAM/UQCRC2/NDUFA10/RCOR1/NDUFA1/NDUFA4/NDUFB9/UQCRC1/SP1/POLR2J/SIN3A/EP300/NDUFA6/SOD1/NDUFS5/NDUFA5/COX6B1/UQCRQ/NDUFS4/NDUFB4/SLC25A5/COX7B/NDUFB10/DLG4/DCTN4/SDHB/NDUFA8/NDUFV2/COX7C/NDUFC1/SDHD/POLR2K/TAF4/UQCR10/NDUFB6/CYC1/UQCR11/COX6C/NDUFAB1/NDUFS2/NDUFS1/COX8A/CREB3L1/GRIN1/POLR2A/PPID/REST/NDUFV1/COX7A2/CLT…
KEGG_ALZHEIMERS_DISEASE	KEGG_ALZHEIMERS_DISEASE	143	0.441775220163492	2.79970850409224	1e-10	0.00000000167272727272727	0.000000000669856459330144	9176	tags=60%, list=29%, signal=43%	ATP2A2/COX4I1/CALM3/UQCRH/NDUFB8/GRIN2A/CYCS/COX7A1/COX5B/COX7A2L/SDHA/UQCRC2/NDUFA10/LRP1/NDUFA1/NDUFA4/PPP3CC/NDUFB9/PPP3CB/UQCRC1/NDUFA6/MAPK3/NDUFS5/NDUFA5/COX6B1/UQCRQ/FAS/NDUFS4/RYR3/MAPK1/NDUFB4/COX7B/NDUFB10/NAE1/SDHB/NDUFA8/NDUFV2/COX7C/BACE2/NDUFC1/SDHD/UQCR10/NDUFB6/CYC1/UQCR11/EIF2AK3/COX6C/NDUFAB1/NDUFS2/NDUFS1/COX8A/CACNA1D/GRIN1/CHP2/ATP2A1/NDUFV1/IDE/COX7A2/GAPDH/CASP9/NDUFB7/NDUF…
KEGG_INSULIN_SIGNALING_PATHWAY	KEGG_INSULIN_SIGNALING_PATHWAY	136	0.42036731505867	2.65162050805069	1e-10	0.00000000167272727272727	0.000000000669856459330144	8487	tags=51%, list=26%, signal=38%	IRS1/SORBS1/SHC2/HRAS/PRKAG2/PPP1CC/PPP1CB/SLC2A4/CALM3/MAPK10/TSC1/RHOQ/PRKAB2/CBLB/PYGL/PRKAR1B/RAF1/PPP1R3C/FLOT2/GYS1/PIK3CA/FBP1/MKNK2/MKNK1/AKT1/BRAF/HK2/AKT3/PIK3CB/MAPK3/ACACA/CRKL/PDE3B/RHEB/PIK3R2/MAPK1/SOCS2/TRIP10/CBLC/PPP1R3D/PPP1R3B/HK1/INPP5D/RPS6/FBP2/PHKA2/PDPK1/IRS2/FLOT1/EIF4E2/PPARGC1A/PYGM/CALM2/PHKA1/SHC1/INSR/FOXO1/FASN/ARAF/PHKB/PRKAR2A/PRKCI/AKT2/PRKAA2/GRB2/TSC2/MAP2K2/K…
KEGG_FOCAL_ADHESION	KEGG_FOCAL_ADHESION	196	0.383211973459999	2.6259197879093	1e-10	0.00000000167272727272727	0.000000000669856459330144	7702	tags=44%, list=24%, signal=34%	FLNC/MYL9/PPP1R12A/MYL5/LAMC3/LAMA4/COL6A2/PIP5K1C/THBS2/LAMA2/SHC2/HRAS/COL6A1/VEGFA/CAV2/PPP1CC/PPP1CB/ILK/VWF/MAPK10/CAV1/PARVA/COL1A2/BCL2/VAV3/VASP/RAF1/COL5A1/PAK3/PIK3CA/CAV3/JUN/AKT1/RAP1A/ITGA9/BRAF/AKT3/RAP1B/CCND2/VCL/PIK3CB/ZYX/MAPK3/LAMB2/ROCK2/CRKL/COL1A1/PIK3R2/MAPK1/ITGA7/TNC/PAK6/TLN1/ITGB1/ITGA5/ITGA6/ACTN4/COL11A1/IGF1R/CDC42/CTNNB1/PDGFC/PDPK1/RAC1/COL3A1/VEGFB/LAMC1/SRC/COL6A…
KEGG_OLFACTORY_TRANSDUCTION	KEGG_OLFACTORY_TRANSDUCTION	373	-0.428756	-2.5004	1e-10	0.00000000167272727272727	0.000000000669856459330144	13490	tags=67%, list=42%, signal=39%	OR10Z1/OR52D1/OR8H1/OR2AE1/OR4C15/GUCA1A/OR6V1/OR8K1/OR2M4/OR56A3/OR6B2/OR5B17/CNGA3/OR10V1/OR4F15/OR51B6/OR7C2/OR1F1/OR5K1/OR5M3/OR8A1/OR52J3/OR13G1/OR51E1/OR52K1/OR7G1/OR5T2/OR51I1/OR9I1/OR5A2/OR52R1/OR13H1/OR2A7/OR11L1/OR4C16/OR6Y1/OR51G2/OR10Q1/OR56A1/OR2J3/OR52I1/CALML6/OR2B6/OR10A5/OR2W3/OR4P4/OR2C3/OR2B2/OR4F4/OR14A16/OR9A4/OR1L4/OR8D1/OR2L3/OR5D18/OR52A1/OR2V2/OR5AU1/OR13C4/OR7A10/OR6C76/…
KEGG_PATHWAYS_IN_CANCER	KEGG_PATHWAYS_IN_CANCER	321	0.335807014741256	2.41232406831302	1e-10	0.00000000167272727272727	0.000000000669856459330144	8584	tags=46%, list=27%, signal=34%	FZD1/FGF10/HHIP/FZD7/DAPK3/TGFB3/LAMC3/FGF13/LAMA4/ZBTB16/PLD1/HSP90AB1/FGF14/TRAF5/FGF7/LAMA2/ABL1/HRAS/SLC2A1/VEGFA/MAPK10/TCF7L2/FGFR1/CYCS/FGF12/CDKN1B/CBLB/TRAF4/HSP90AA1/BCL2/AR/RAF1/PPARG/PIAS1/STAT5B/EGLN3/PIK3CA/JUN/WNT2B/SMAD4/AKT1/BRAF/CDK4/TRAF6/KIT/LEF1/SKP2/PTCH1/AKT3/EP300/PIK3CB/TCF7/MAPK3/RUNX1T1/FZD3/LAMB2/DVL2/MSH6/CRKL/BMP2/GLI3/SUFU/PIK3R2/NFKB1/DVL1/SMAD2/FAS/MLH1/MAX/MECOM/…
KEGG_NEUROTROPHIN_SIGNALING_PATHWAY	KEGG_NEUROTROPHIN_SIGNALING_PATHWAY	125	0.415740366939305	2.58742090272432	0.000000000135705147901658	0.00000000208081226782543	0.000000000833277223957551	9176	tags=55%, list=29%, signal=40%	IRS1/CAMK2G/SHC2/ABL1/HRAS/CALM3/MAPK10/FOXO3/MAP2K7/PRKCD/BCL2/RAF1/ATF4/CAMK2D/PIK3CA/JUN/MAP3K5/AKT1/RAP1A/RPS6KA5/BRAF/TRAF6/AKT3/RAP1B/YWHAG/MAP2K5/PIK3CB/MAPK3/CRKL/PIK3R2/NFKB1/MAPK1/PLCG1/NTRK3/KIDINS220/MAP3K3/CDC42/NTRK2/PDPK1/RAC1/IRS2/CAMK2A/MAGED1/ARHGDIA/IRAK1/MAPKAPK2/MAPK14/CALM2/YWHAQ/ZNF274/FRS2/NTF4/SHC1/PSEN1/MAPK7/IRAK4/NFKBIA/AKT2/GRB2/YWHAZ/MAP2K2/KRAS/SOS2/TP53/RPS6KA3/IRA…
KEGG_WNT_SIGNALING_PATHWAY	KEGG_WNT_SIGNALING_PATHWAY	149	0.378436992268065	2.43770810094584	0.000000000317940105771925	0.0000000045000753432334	0.00000000180208966834289	8842	tags=50%, list=28%, signal=37%	PPP2R5D/FZD1/FZD7/CAMK2G/SIAH1/MAPK10/TCF7L2/TBL1X/CSNK2A2/DKK1/NFATC4/CUL1/CAMK2D/JUN/WNT2B/LRP6/SMAD4/SOX17/PPP3CC/PRICKLE2/LEF1/TBL1Y/PPP3CB/CCND2/EP300/TCF7/SENP2/FZD3/DVL2/NFATC2/ROCK2/PPP2CA/CSNK2B/DVL1/SMAD2/DVL3/LRP5/FZD2/CSNK2A1/CSNK1A1/WNT11/VANGL2/FZD6/PPP2CB/CTNNB1/DAAM1/RAC1/CHP2/FZD4/CAMK2A/NKD1/SMAD3/CTBP1/PPP2R5E/ROCK1/PSEN1/SFRP4/FRAT2/CHD8/PPP2R5A/PPP3R1/WNT8A/SKP1/PLCB3/TCF7L1/…
KEGG_MAPK_SIGNALING_PATHWAY	KEGG_MAPK_SIGNALING_PATHWAY	264	0.301703837166355	2.1574275659638	0.000000000376701808773022	0.00000000495093805815972	0.00000000198264109880538	5203	tags=31%, list=16%, signal=26%	FLNC/FGF10/TGFB3/FGF13/FGF14/FGF7/TAB2/HSPA1A/HRAS/ELK4/PLA2G2A/MAP3K13/MAPK10/FGFR1/FGF12/MAP2K7/MAP3K4/NFATC4/SRF/PLA2G4A/DDIT3/MAP2K4/CACNA2D1/RAF1/ATF4/HSPA1B/ECSIT/MAPKAPK5/JMJD7-PLA2G4B/HSPB1/PTPRR/DUSP10/MKNK2/JUN/MAP3K5/MKNK1/AKT1/PPM1A/RAP1A/RPS6KA5/RRAS/RAPGEF2/BRAF/PPP3CC/GNG12/TRAF6/AKT3/PPP3CB/RAP1B/MAP2K5/MAPK8IP3/MAPK3/NFATC2/CRKL/MAP3K2/NFKB1/ATF2/DUSP8/FAS/MAX/MECOM/MAPK1/CACNB2/…
KEGG_ENDOCYTOSIS	KEGG_ENDOCYTOSIS	176	0.342135770146079	2.29296472951707	0.00000000240262335190682	0.0000000294721797833903	0.0000000118023603251563	8683	tags=48%, list=27%, signal=35%	PLD1/PIP5K1C/PARD3/HSPA1A/HRAS/CBLB/RAB11FIP3/HSPA1B/EEA1/VPS36/RAB4A/CHMP2B/SH3GLB1/EHD2/SMURF1/TRAF6/KIT/SH3GL1/RAB22A/PDCD6IP/ACAP3/HGS/ADRB2/RAB11B/EPN1/ASAP3/CBLC/RABEP1/NEDD4L/ERBB4/PLD2/IQSEC1/PIP4K2B/CHMP4C/CXCR4/ARAP3/VPS28/IGF1R/VPS4A/CDC42/FGFR3/CHMP1B/ACAP2/WWP1/RNF41/PIKFYVE/TSG101/VPS45/CHMP5/SRC/ITCH/CLTB/RAB5A/RAB5B/CHMP2A/CHMP4A/AP2M1/ARFGAP2/TFRC/RAB11FIP1/DAB2/FGFR4/EPN3/CLTA/P…
KEGG_NEUROACTIVE_LIGAND_RECEPTOR_INTERACTION	KEGG_NEUROACTIVE_LIGAND_RECEPTOR_INTERACTION	270	-0.357191	-2.031	0.00000000585752602784947	0.0000000673615493202689	0.0000000269754488124646	12464	tags=56%, list=39%, signal=34%	DRD4/GRIK1/THRB/GPR50/GRID2/CHRNA1/SSTR2/HTR5A/TRHR/GRIN2C/UTS2R/SSTR3/ADORA2A/LHB/HCRTR2/GABRA4/SSTR5/CALCRL/GCGR/MC2R/GRIA2/MTNR1A/TAAR8/DRD3/PTGER1/MCHR2/CHRNA9/CHRNA2/RXFP2/GRIN3A/PTAFR/GABRB3/F2/P2RX2/PLG/CHRND/NTSR1/CHRNB3/GPR83/PTGDR/CHRNE/NTSR2/F2R/P2RX1/GRPR/CHRNG/PRSS1/GRIA1/NPFFR2/MC3R/HRH2/CNR2/GHSR/TSHB/HRH1/GALR3/PRL/CCKBR/GRID1/GABRR2/GH2/GRIK5/GRIK4/LTB4R/GABRA2/LTB4R2/PRSS3/ADRB3…
KEGG_TIGHT_JUNCTION	KEGG_TIGHT_JUNCTION	126	0.374989023411571	2.35999526020151	0.0000000102088018818822	0.000000110495267427431	0.000000044248676887415	8453	tags=48%, list=26%, signal=36%	MYL9/MYH6/MYH11/MYL5/MYH7/PARD3/HRAS/MPDZ/GNAI1/CSNK2A2/IGSF5/PRKCD/JAM3/MAGI2/PPP2R2D/PPP2R2A/AKT1/RRAS/CDK4/AKT3/EPB41L2/RAB3B/PPP2CA/VAPA/CSNK2B/EPB41L1/RRAS2/ASH1L/PPP2R2B/CSNK2A1/ACTN4/CDC42/PPP2CB/CTNNB1/PRKCE/CTNNA1/CGN/MAGI3/SRC/EPB41/EXOC3/MRAS/MYH10/ACTG1/TJP1/SPTAN1/ACTB/PTEN/EXOC4/PRKCI/MYH9/AKT2/PARD6G/EPB41L3/GNAI2/CLDN23/SYMPK/KRAS/CLDN11/CLDN20/ACTN1
KEGG_RENAL_CELL_CARCINOMA	KEGG_RENAL_CELL_CARCINOMA	66	0.486556369943323	2.62116877393029	0.0000000150769099833433	0.000000148204115481459	0.0000000593494741630558	8521	tags=61%, list=27%, signal=45%	TGFB3/HRAS/SLC2A1/VEGFA/RAF1/PAK3/EGLN3/PIK3CA/JUN/AKT1/RAP1A/BRAF/AKT3/RAP1B/EP300/PIK3CB/MAPK3/CRKL/PIK3R2/MAPK1/ARNT/PAK6/CUL2/EGLN2/CDC42/RAC1/VEGFB/TGFB1/VEGFC/ETS1/ARAF/TGFB2/AKT2/PGF/GRB2/MAP2K2/EPAS1/KRAS/SOS2/RBX1
KEGG_ERBB_SIGNALING_PATHWAY	KEGG_ERBB_SIGNALING_PATHWAY	86	0.435990606165099	2.48793082815109	0.0000000153036858377594	0.000000148204115481459	0.0000000593494741630558	9074	tags=53%, list=28%, signal=38%	CAMK2G/SHC2/ABL1/HRAS/MAPK10/CDKN1B/MAP2K7/CBLB/MAP2K4/RAF1/STAT5B/CAMK2D/PAK3/PIK3CA/JUN/AKT1/BRAF/NCK1/AKT3/PIK3CB/MAPK3/CRKL/PIK3R2/MAPK1/PLCG1/PAK6/CBLC/ERBB4/NRG2/CAMK2A/SRC/STAT5A/CDKN1A/SHC1/ARAF/BTC/AKT2/GRB2/MAP2K2/NCK2/KRAS/SOS2/NRG4/NRG1/ERBB3/PIK3R1
KEGG_CHRONIC_MYELOID_LEUKEMIA	KEGG_CHRONIC_MYELOID_LEUKEMIA	73	0.461030549028715	2.51544007009771	0.0000000277577469265718	0.000000243210734975677	0.0000000973956032511293	8584	tags=59%, list=27%, signal=43%	TGFB3/SHC2/ABL1/HRAS/CDKN1B/CBLB/RAF1/STAT5B/PIK3CA/SMAD4/AKT1/BRAF/CDK4/AKT3/PIK3CB/MAPK3/CRKL/PIK3R2/NFKB1/MECOM/MAPK1/CBLC/TGFB1/SMAD3/CTBP1/STAT5A/CDKN1A/SHC1/E2F3/RUNX1/HDAC2/ARAF/TGFB2/NFKBIA/AKT2/GRB2/GAB2/MAP2K2/IKBKG/RB1/KRAS/SOS2/TP53
KEGG_PROSTATE_CANCER	KEGG_PROSTATE_CANCER	89	0.425622956820391	2.45364383592757	0.0000000272277473785584	0.000000243210734975677	0.0000000973956032511293	8584	tags=58%, list=27%, signal=43%	HSP90AB1/SRD5A2/HRAS/TCF7L2/FGFR1/CDKN1B/HSP90AA1/BCL2/AR/RAF1/ATF4/PIK3CA/AKT1/BRAF/LEF1/AKT3/EP300/PIK3CB/TCF7/MAPK3/PIK3R2/NFKB1/MAPK1/IGF1R/CTNNB1/PDGFC/PDPK1/CREB3L1/CDK2/CREB3L4/CASP9/CREB1/CDKN1A/E2F3/CREB3/FOXO1/CREB5/ARAF/PTEN/PDGFD/NFKBIA/AKT2/GRB2/TCF7L1/FGFR2/MAP2K2/PDGFRA/IKBKG/RB1/KRAS/SOS2/TP53
KEGG_RNA_DEGRADATION	KEGG_RNA_DEGRADATION	50	0.528513959197308	2.69015658950562	0.0000000526610264220797	0.000000440437675530121	0.000000176376643518927	5764	tags=54%, list=18%, signal=44%	HSPD1/EXOSC3/PAPOLG/DCP1B/EXOSC6/DCPS/LSM7/EXOSC7/LSM2/DCP1A/LSM6/CNOT6/CNOT2/CNOT4/LSM5/MPHOSPH6/CNOT6L/EXOSC1/HSPA9/CNOT10/EXOSC8/CNOT8/EXOSC10/DCP2/PAPOLA/CNOT1/CNOT7
KEGG_VASCULAR_SMOOTH_MUSCLE_CONTRACTION	KEGG_VASCULAR_SMOOTH_MUSCLE_CONTRACTION	111	0.380321407628377	2.29700845360551	0.0000000650043022288843	0.000000520034417831074	0.00000020825176915432	5107	tags=34%, list=16%, signal=29%	ACTG2/PRKG1/PPP1R12B/MYL9/PPP1R12A/MYH11/ACTA2/KCNMA1/RAMP1/GUCY1A2/PPP1CC/PLA2G2A/PPP1CB/CALM3/MYL6/PRKCD/PLA2G4A/ARHGEF12/RAF1/KCNMB1/JMJD7-PLA2G4B/PPP1R14A/EDNRA/CALD1/BRAF/GNA13/MAPK3/ROCK2/MAPK1/ADORA2B/ADRA1A/NPR2/ADCY7/CYP4A22/AGTR1/PRKCE/PLA2G12A/CACNA1D
KEGG_ADHERENS_JUNCTION	KEGG_ADHERENS_JUNCTION	68	0.464808985931254	2.49764713941369	0.0000000738235816244785	0.000000565980792454335	0.000000226651347092697	8074	tags=53%, list=25%, signal=40%	SORBS1/PARD3/TCF7L2/FGFR1/CSNK2A2/FER/SMAD4/WASL/LEF1/CTNND1/VCL/EP300/TCF7/MAPK3/CSNK2B/SMAD2/MAPK1/IQGAP1/CSNK2A1/ACTN4/IGF1R/CDC42/CTNNB1/CTNNA1/RAC1/SRC/SMAD3/PTPRM/ACTG1/TJP1/INSR/ACTB/PTPN6/TCF7L1/MAP3K7/NLK
KEGG_VALINE_LEUCINE_AND_ISOLEUCINE_DEGRADATION	KEGG_VALINE_LEUCINE_AND_ISOLEUCINE_DEGRADATION	43	0.546695366534703	2.65081135810801	0.000000167397989501135	0.00000123204920272835	0.000000493383548003344	8070	tags=72%, list=25%, signal=54%	AOX1/ALDH1B1/HADHA/HMGCS1/PCCA/AUH/DLD/MCCC1/ACADSB/HADH/ACAT1/ALDH9A1/HIBADH/ALDH7A1/HIBCH/ALDH3A2/BCAT2/ALDH2/HADHB/ACADM/OXCT1/ECHS1/HMGCS2/ACAA1/HMGCL/ALDH6A1/DBT/IVD/MCEE/MCCC2/BCAT1
KEGG_PEROXISOME	KEGG_PEROXISOME	78	0.415770721927599	2.30199831114853	0.000000400486619947976	0.00000283421300270875	0.0000011349823237392	6972	tags=53%, list=22%, signal=41%	EPHX2/PEX14/DHRS4/PEX1/NUDT12/SLC25A17/PHYH/CAT/SOD1/HSD17B4/ECH1/GSTK1/PEX13/IDH1/SLC27A2/GNPAT/ACOX1/CRAT/PEX11A/ACSL5/IDH2/HACL1/PEX19/PEX6/PRDX5/AGPS/MLYCD/MPV17/ACOX2/PMVK/ACAA1/BAAT/PEX12/ECI2/HMGCL/NUDT19/ACOX3/ABCD2/PEX3/SCP2/ACSL3
KEGG_CITRATE_CYCLE_TCA_CYCLE	KEGG_CITRATE_CYCLE_TCA_CYCLE	30	0.602179404280491	2.62192065285839	0.000000444351087879958	0.00000292002143463972	0.00000116934496810515	5760	tags=57%, list=18%, signal=47%	PDHA1/SDHA/MDH2/IDH3G/DLD/DLST/SUCLG1/OGDH/ACO2/IDH1/SDHB/CS/DLAT/IDH2/SDHD/PDHB/MDH1
KEGG_PURINE_METABOLISM	KEGG_PURINE_METABOLISM	147	0.326390081513664	2.08395590928776	0.000000443296934337941	0.00000292002143463972	0.00000116934496810515	8333	tags=46%, list=26%, signal=34%	AK4/POLR1D/POLR3D/PDE5A/GUCY1A2/NME4/POLD2/ENPP1/IMPDH2/POLD3/NT5E/NUDT9/FHIT/PDE4D/NT5C2/GUK1/ENTPD6/NUDT2/ADK/POLR2J/POLE4/PDE10A/PDE1C/GMPS/PDE3B/POLA1/NT5C/PDE6B/NPR2/ADCY7/RRM1/POLR2K/GART/NME2/GMPR2/APRT/PDE8A/ENTPD3/POLE3/POLR2A/PAPSS1/POLR1A/DGUOK/POLR3C/AK2/NME6/POLR3GL/NME7/POLR2I/PRPS1L1/POLR2E/PDE1B/POLR1B/POLR2C/NME1/POLR2G/PDE7B/POLR3A/POLR2B/POLR3B/ENTPD5/POLR1C/PAICS/PNP/ENTPD4/PR…
KEGG_COLORECTAL_CANCER	KEGG_COLORECTAL_CANCER	62	0.450520081538387	2.40041535746639	0.00000110581576695303	0.00000701621038342615	0.00000280969523363747	8584	tags=55%, list=27%, signal=40%	TGFB3/MAPK10/TCF7L2/CYCS/BCL2/RAF1/PIK3CA/JUN/SMAD4/AKT1/BRAF/LEF1/AKT3/PIK3CB/TCF7/MAPK3/MSH6/PIK3R2/SMAD2/MLH1/MAPK1/CTNNB1/MSH3/RAC1/TGFB1/SMAD3/CASP9/ARAF/TGFB2/AKT2/TCF7L1/APPL1/KRAS/TP53
KEGG_ACUTE_MYELOID_LEUKEMIA	KEGG_ACUTE_MYELOID_LEUKEMIA	57	0.462733733175844	2.42192444661419	0.00000137405668572443	0.00000842754767244317	0.00000337487607020036	9074	tags=58%, list=28%, signal=42%	ZBTB16/HRAS/TCF7L2/RAF1/STAT5B/PIK3CA/AKT1/BRAF/KIT/LEF1/AKT3/PIK3CB/TCF7/MAPK3/RUNX1T1/PIK3R2/NFKB1/MAPK1/PML/STAT5A/PIM1/RUNX1/ARAF/AKT2/GRB2/TCF7L1/MAP2K2/IKBKG/KRAS/SOS2/JUP/PPARD/PIK3R1
KEGG_PYRIMIDINE_METABOLISM	KEGG_PYRIMIDINE_METABOLISM	93	0.375987150315007	2.19717293534895	0.00000145236199782759	0.00000862047121291213	0.00000345213378091447	9190	tags=56%, list=29%, signal=40%	UCKL1/POLR1D/POLR3D/NME4/POLD2/POLD3/NT5E/DCTD/NT5C2/ENTPD6/UPRT/NUDT2/POLR2J/POLE4/DHODH/POLA1/NT5C/AK3/DUT/RRM1/POLR2K/NME2/ENTPD3/POLE3/POLR2A/POLR1A/UCK2/POLR3C/NME6/POLR3GL/NME7/POLR2I/POLR2E/TK2/POLR1B/POLR2C/NME1/POLR2G/POLR3A/CMPK2/POLR2B/POLR3B/ENTPD5/POLR1C/PNP/ENTPD4/PRIM1/UMPS/POLR3F/DPYD/CANT1/NME5
KEGG_ENDOMETRIAL_CANCER	KEGG_ENDOMETRIAL_CANCER	52	0.468152988062856	2.40126098964405	0.00000424951935439043	0.0000233944179395088	0.0000093684740032358	8584	tags=56%, list=27%, signal=41%	HRAS/ILK/FOXO3/TCF7L2/RAF1/PIK3CA/AKT1/BRAF/LEF1/AKT3/PIK3CB/TCF7/MAPK3/PIK3R2/MLH1/MAPK1/CTNNB1/PDPK1/CTNNA1/CASP9/ARAF/PTEN/AKT2/GRB2/TCF7L1/MAP2K2/KRAS/SOS2/TP53
KEGG_TGF_BETA_SIGNALING_PATHWAY	KEGG_TGF_BETA_SIGNALING_PATHWAY	85	0.36644836166142	2.08787740597623	0.00000432288157577881	0.0000233944179395088	0.0000093684740032358	7850	tags=49%, list=24%, signal=37%	ID1/TGFB3/SMAD6/SMAD9/THBS2/BMP5/CUL1/ACVR2A/ID4/BMPR1A/SMAD4/LTBP1/SMURF1/SP1/EP300/BMP7/MAPK3/ROCK2/BMP2/PPP2CA/SMAD2/MAPK1/ACVR2B/FST/SMAD7/BMPR2/PPP2CB/ZFYVE16/RBL2/BMP8A/ID3/TGFB1/SMAD3/INHBB/ROCK1/DCN/ACVR1/TGFB2/SKP1/TFDP1/BMP4/ID2
KEGG_REGULATION_OF_ACTIN_CYTOSKELETON	KEGG_REGULATION_OF_ACTIN_CYTOSKELETON	210	0.269895046037212	1.87649844124407	0.00000422649400762354	0.0000233944179395088	0.0000093684740032358	7536	tags=36%, list=23%, signal=28%	MYL9/PPP1R12A/FGF10/CFL2/MYL5/FGF13/ENAH/FGF14/PIP5K1C/FGF7/HRAS/PPP1CC/PPP1CB/FGFR1/FGF12/FGD1/DIAPH2/ARHGEF12/ITGAE/VAV3/RAF1/SSH3/PAK3/PIK3CA/ARHGEF6/RRAS/ITGA9/BRAF/WASL/GNG12/GNA13/VCL/PIK3CB/MAPK3/ROCK2/CRKL/PIK3R2/MAPK1/ABI2/ITGA7/RRAS2/GSN/PAK6/TIAM1/ARHGEF7/IQGAP1/ITGB1/ITGA5/ITGA6/PFN2/PIP4K2B/ACTN4/CDC42/FGFR3/PDGFC/RAC1/BRK1/ARPC1A/PIKFYVE/ARPC2/NCKAP1/PIP4K2A/ROCK1/MRAS/MYH10/PXN/ACT…
KEGG_ARRHYTHMOGENIC_RIGHT_VENTRICULAR_CARDIOMYOPATHY_ARVC	KEGG_ARRHYTHMOGENIC_RIGHT_VENTRICULAR_CARDIOMYOPATHY_ARVC	74	0.391473859371288	2.13559410877676	0.0000047405934529931	0.0000249219770100209	0.00000998019674314337	9438	tags=53%, list=29%, signal=37%	DES/SGCA/SLC8A1/ATP2A2/LAMA2/TCF7L2/CACNA2D1/EMD/SGCG/ITGA9/LEF1/TCF7/CACNB2/ITGA7/SGCB/ITGB1/ITGA5/ITGA6/ACTN4/CTNNB1/CTNNA1/CACNB1/CACNA1D/DSG2/LMNA/DAG1/ACTG1/ITGA1/ACTB/ITGA8/TCF7L1/CACNA2D3/ACTN1/PKP2/JUP/GJA1/DSP/ITGA10/CACNB4
KEGG_NUCLEOTIDE_EXCISION_REPAIR	KEGG_NUCLEOTIDE_EXCISION_REPAIR	43	0.488781531354345	2.36999929807395	0.00000826040406056668	0.0000422198429762297	0.0000169072597730897	6876	tags=58%, list=21%, signal=46%	DDB2/POLD2/POLD3/ERCC6/MNAT1/RFC5/CETN2/XPA/ERCC5/POLE4/ERCC3/RAD23B/ERCC1/RPA4/GTF2H1/CCNH/CDK7/CUL4B/GTF2H3/POLE3/RFC4/LIG1/ERCC8/RPA2/RFC1
KEGG_SMALL_CELL_LUNG_CANCER	KEGG_SMALL_CELL_LUNG_CANCER	84	0.380936476454958	2.16175002407269	0.00000885085353717123	0.0000440150554280947	0.0000176261663613652	9276	tags=51%, list=29%, signal=36%	LAMC3/LAMA4/TRAF5/LAMA2/CYCS/CDKN1B/TRAF4/BCL2/PIAS1/PIK3CA/FHIT/AKT1/CDK4/TRAF6/SKP2/AKT3/PIK3CB/LAMB2/PIK3R2/NFKB1/MAX/RXRA/ITGB1/TRAF1/ITGA6/PIAS3/CDK2/RXRB/LAMC1/CASP9/COL4A2/CKS1B/E2F3/PTEN/NFKBIA/AKT2/IKBKG/RB1/TP53/BIRC2/PIK3R1/FN1/XIAP
KEGG_ARGININE_AND_PROLINE_METABOLISM	KEGG_ARGININE_AND_PROLINE_METABOLISM	50	0.45225539885779	2.30199755409408	0.0000118022628481298	0.0000571477990541021	0.0000228852742207503	4539	tags=40%, list=14%, signal=34%	CKB/ALDH1B1/SAT2/MAOB/MAOA/OAT/ALDH4A1/GOT2/AGMAT/GLUD1/P4HA1/ALDH9A1/GLUD2/ALDH7A1/ALDH3A2/P4HA2/CPS1/GATM/CKMT2/ALDH2
KEGG_PANCREATIC_CANCER	KEGG_PANCREATIC_CANCER	69	0.39263909840724	2.12782335050353	0.00001567044597589	0.0000739323605016351	0.0000296067805212498	8584	tags=52%, list=27%, signal=38%	TGFB3/PLD1/VEGFA/MAPK10/RAF1/PIK3CA/SMAD4/AKT1/ARHGEF6/BRAF/CDK4/AKT3/PIK3CB/MAPK3/PIK3R2/NFKB1/SMAD2/MAPK1/CDC42/RALA/RAC1/VEGFB/TGFB1/SMAD3/CASP9/RALB/VEGFC/E2F3/ARAF/TGFB2/AKT2/PGF/IKBKG/RB1/KRAS/TP53
KEGG_PROTEIN_EXPORT	KEGG_PROTEIN_EXPORT	22	0.60695161132324	2.38899789430366	0.0000230336984999744	0.000105955013099882	0.000042430497236795	8968	tags=68%, list=28%, signal=49%	SEC63/SRP54/SRP68/HSPA5/SEC61A1/IMMP2L/SRP14/SEC61G/SEC11A/SEC61B/SRP72/SRP9/OXA1L/IMMP1L/SRPRB
KEGG_VEGF_SIGNALING_PATHWAY	KEGG_VEGF_SIGNALING_PATHWAY	74	0.365546396121503	1.99415289515219	0.0000284835992904211	0.000127828835839939	0.0000511900372356734	6059	tags=38%, list=19%, signal=31%	SHC2/HRAS/VEGFA/PLA2G2A/NFATC4/PLA2G4A/RAF1/JMJD7-PLA2G4B/HSPB1/PIK3CA/AKT1/PPP3CC/AKT3/PPP3CB/PIK3CB/MAPK3/NFATC2/PIK3R2/MAPK1/PLCG1/CDC42/PLA2G12A/RAC1/CHP2/SRC/MAPKAPK2/CASP9/MAPK14
KEGG_MTOR_SIGNALING_PATHWAY	KEGG_MTOR_SIGNALING_PATHWAY	51	0.439743212537923	2.24659449795579	0.0000305869792579284	0.000134000099606162	0.0000536613671191726	9074	tags=55%, list=28%, signal=39%	DDIT4/VEGFA/TSC1/EIF4B/ULK1/PIK3CA/AKT1/BRAF/AKT3/PIK3CB/MAPK3/RHEB/PIK3R2/MAPK1/RPS6/PDPK1/VEGFB/EIF4E2/RICTOR/VEGFC/AKT2/PGF/PRKAA2/TSC2/ULK3/RPS6KA3/CAB39/PIK3R1
KEGG_AXON_GUIDANCE	KEGG_AXON_GUIDANCE	127	0.303966370862341	1.91615355668425	0.0000348046850212366	0.00014893167543971	0.0000596408311257421	6499	tags=36%, list=20%, signal=29%	SLIT2/NTN1/CFL2/SLIT3/CXCL12/ABL1/PLXNA3/HRAS/GNAI1/NFATC4/SEMA3E/ARHGEF12/SEMA6A/PAK3/PLXNB3/SEMA3A/PPP3CC/NCK1/PPP3CB/MAPK3/SEMA3D/NFATC2/ROCK2/MAPK1/PAK6/EFNB1/RHOD/EPHB6/ABLIM1/ITGB1/SEMA5A/CXCR4/CDC42/EFNA1/RAC1/CHP2/FES/DPYSL2/SEMA4C/RASA1/EFNA5/ROCK1/ABLIM3/SRGAP3/SEMA4B/SEMA6D
KEGG_FATTY_ACID_METABOLISM	KEGG_FATTY_ACID_METABOLISM	42	0.467464941244199	2.23729106732054	0.000037104950714981	0.000155166157535375	0.0000621374772738917	7529	tags=62%, list=23%, signal=47%	ALDH1B1/HADHA/ACADSB/HADH/ACAT1/ALDH9A1/ADH5/ALDH7A1/ALDH3A2/ACOX1/CYP4A22/ACSL5/ALDH2/HADHB/ADH1A/ACADM/ECHS1/CPT1B/ACAA1/ECI2/ACOX3/ACSL3/ECI1/ADH1C/ACADVL/CPT1A
KEGG_MISMATCH_REPAIR	KEGG_MISMATCH_REPAIR	23	0.596865952242912	2.38693753820014	0.0000424716609762898	0.00015531067772715	0.000062195351492566	6876	tags=61%, list=21%, signal=48%	POLD2/POLD3/MLH3/RFC5/MSH6/RPA4/MLH1/MSH3/PMS2/RFC4/LIG1/RPA2/SSBP1/RFC1
KEGG_NICOTINATE_AND_NICOTINAMIDE_METABOLISM	KEGG_NICOTINATE_AND_NICOTINAMIDE_METABOLISM	22	0.594543601923714	2.34015922615457	0.0000397053106379539	0.00015531067772715	0.000062195351492566	5196	tags=45%, list=16%, signal=38%	AOX1/ENPP1/NMNAT2/NT5E/NADSYN1/NT5C2/NUDT12/NT5C/BST1/NMNAT3
KEGG_AMINOACYL_TRNA_BIOSYNTHESIS	KEGG_AMINOACYL_TRNA_BIOSYNTHESIS	22	0.593678222351612	2.33675304032863	0.0000410214956041188	0.00015531067772715	0.000062195351492566	6426	tags=68%, list=20%, signal=55%	WARS2/LARS2/MTFMT/CARS2/RARS2/HARS2/EARS2/MARS2/PSTK/AARS2/FARS2/SARS2/FARSB/NARS2/IARS2
KEGG_PYRUVATE_METABOLISM	KEGG_PYRUVATE_METABOLISM	39	0.482716103053169	2.23529208871313	0.0000430480682830689	0.00015531067772715	0.000062195351492566	5760	tags=54%, list=18%, signal=44%	ALDH1B1/PDHA1/ACYP1/MDH2/GRHPR/DLD/ACAT1/ACSS2/ALDH9A1/ACSS1/ACACA/ALDH7A1/ALDH3A2/ME3/GLO1/LDHB/ME2/DLAT/ALDH2/PDHB/MDH1
KEGG_BASAL_CELL_CARCINOMA	KEGG_BASAL_CELL_CARCINOMA	55	0.423076851787111	2.20037024885817	0.0000385704358386274	0.00015531067772715	0.000062195351492566	5253	tags=42%, list=16%, signal=35%	FZD1/HHIP/FZD7/TCF7L2/WNT2B/LEF1/PTCH1/TCF7/FZD3/DVL2/BMP2/GLI3/SUFU/DVL1/DVL3/STK36/FZD2/GLI1/WNT11/SMO/FZD6/CTNNB1/FZD4
KEGG_INOSITOL_PHOSPHATE_METABOLISM	KEGG_INOSITOL_PHOSPHATE_METABOLISM	54	0.411894363827592	2.13772140906782	0.0000425580372371268	0.00015531067772715	0.000062195351492566	8144	tags=57%, list=25%, signal=43%	PI4KA/PIP5K1C/PIK3CA/INPPL1/PLCE1/PLCD1/PI4KB/CDIPT/INPP5A/PIK3CB/PLCD3/PLCG1/TPI1/OCRL/PIP4K2B/SYNJ1/PIK3C3/INPP1/INPP4A/IPMK/PIKFYVE/PIP4K2A/INPP5E/PIK3C2A/MINPP1/ALDH6A1/PTEN/PLCB3/ITPK1/ITPKB/INPP5B
KEGG_GLYCOLYSIS_GLUCONEOGENESIS	KEGG_GLYCOLYSIS_GLUCONEOGENESIS	60	0.399448953188353	2.11498133576416	0.0000421361304729445	0.00015531067772715	0.000062195351492566	5060	tags=43%, list=16%, signal=37%	ALDH1B1/PDHA1/PGM1/PGM2/FBP1/DLD/HK2/ACSS2/ALDH9A1/ACSS1/ADH5/ALDOA/ALDH7A1/ALDH3A2/PFKL/PGAM1/TPI1/LDHB/HK1/GPI/DLAT/ALDH2/PGAM4/ADH1A/FBP2/PDHB
KEGG_DILATED_CARDIOMYOPATHY	KEGG_DILATED_CARDIOMYOPATHY	90	0.341807930713039	1.96718382438187	0.0000441901115584552	0.000156365010129918	0.0000626175669856652	8720	tags=43%, list=27%, signal=32%	DES/MYH6/PLN/SGCA/SLC8A1/TPM2/TGFB3/MYH7/ATP2A2/LAMA2/CACNA2D1/EMD/SGCG/ITGA9/CACNB2/ITGA7/SGCB/ADCY7/ITGB1/ITGA5/ITGA6/TNNC1/CACNB1/CACNA1D/TGFB1/LMNA/DAG1/ACTG1/ITGA1/ACTB/TGFB2/ITGA8/ADCY3/CACNA2D3/ADRB1/TPM4/MYL3/ADCY9/TTN
KEGG_NOTCH_SIGNALING_PATHWAY	KEGG_NOTCH_SIGNALING_PATHWAY	47	0.437568548674927	2.20215597754163	0.0000461018763879395	0.000160051797271337	0.0000640939691590023	7119	tags=51%, list=22%, signal=40%	RBPJ/HES1/NUMBL/KAT2A/MAML2/EP300/DVL2/CIR1/DVL1/DVL3/NCOR2/SNW1/KAT2B/NOTCH3/JAG2/JAG1/CTBP1/DTX3/MAML3/DLL1/DTX3L/PSEN1/NOTCH2/HDAC2
KEGG_NON_SMALL_CELL_LUNG_CANCER	KEGG_NON_SMALL_CELL_LUNG_CANCER	54	0.408786986460245	2.12159419853135	0.0000497900264989747	0.000169654905107617	0.0000679396073085425	8584	tags=56%, list=27%, signal=41%	HRAS/FOXO3/RAF1/PIK3CA/FHIT/AKT1/BRAF/CDK4/AKT3/PIK3CB/MAPK3/PIK3R2/MAPK1/STK4/PLCG1/RXRA/RASSF1/PDPK1/RXRB/CASP9/RASSF5/E2F3/ARAF/AKT2/GRB2/MAP2K2/RB1/KRAS/SOS2/TP53
KEGG_FC_EPSILON_RI_SIGNALING_PATHWAY	KEGG_FC_EPSILON_RI_SIGNALING_PATHWAY	78	0.355017385802109	1.9656252339171	0.0000636068477180454	0.00021279381782037	0.0000852149156031231	5111	tags=32%, list=16%, signal=27%	HRAS/FCER1A/PLA2G2A/MAPK10/MAP2K7/PRKCD/PLA2G4A/MAP2K4/VAV3/RAF1/JMJD7-PLA2G4B/PIK3CA/AKT1/AKT3/PIK3CB/MAPK3/PIK3R2/MAPK1/PLCG1/INPP5D/MS4A2/PRKCE/PDPK1/PLA2G12A/RAC1
KEGG_PROPANOATE_METABOLISM	KEGG_PROPANOATE_METABOLISM	31	0.513097780773279	2.21022053972964	0.0000654121612461627	0.000214925672665963	0.0000860686332186351	5863	tags=58%, list=18%, signal=47%	ALDH1B1/HADHA/PCCA/ACAT1/ACSS2/ALDH9A1/ACSS1/ACACA/ALDH7A1/SUCLG1/HIBCH/ALDH3A2/LDHB/ALDH2/ACADM/ECHS1/MLYCD/ACSS3
KEGG_LYSINE_DEGRADATION	KEGG_LYSINE_DEGRADATION	39	0.471328515408247	2.18256009073083	0.0000732104930153417	0.00023632860903198	0.0000946396031592598	5406	tags=51%, list=17%, signal=43%	ALDH1B1/SETD7/HADHA/SETDB2/PLOD1/AASS/EHMT1/HADH/ACAT1/ALDH9A1/AADAT/ALDH7A1/DLST/OGDH/ALDH3A2/ASH1L/ALDH2/SUV39H2/SETD2/ECHS1
KEGG_FC_GAMMA_R_MEDIATED_PHAGOCYTOSIS	KEGG_FC_GAMMA_R_MEDIATED_PHAGOCYTOSIS	91	0.334672750790954	1.93995520908112	0.000106717360363667	0.000338551625981289	0.000135575593928434	5592	tags=33%, list=17%, signal=27%	CFL2/PLD1/PIP5K1C/PRKCD/PLA2G4A/VAV3/VASP/RAF1/PIK3CA/AKT1/WASL/AKT3/PIK3CB/MAPK3/CRKL/PIK3R2/MAPK1/GSN/PLCG1/ASAP3/PLD2/INPP5D/PIP4K2B/MARCKS/CDC42/PRKCE/RAC1/ARPC1A/PIKFYVE/ARPC2
KEGG_GNRH_SIGNALING_PATHWAY	KEGG_GNRH_SIGNALING_PATHWAY	100	0.306838642789908	1.82405157587899	0.000126994661660039	0.000396051148227918	0.000158601718397908	9176	tags=44%, list=29%, signal=32%	CAMK2G/PLD1/HRAS/PLA2G2A/CALM3/MAPK10/MAP2K7/PRKCD/MAP3K4/PLA2G4A/MAP2K4/RAF1/ATF4/JMJD7-PLA2G4B/CAMK2D/JUN/MAPK3/MAP3K2/MAPK1/ADCY7/PLD2/MAP3K3/CDC42/PLA2G12A/CACNA1D/CAMK2A/SRC/GNRH1/MAPK14/CALM2/GNA11/ITPR1/MAPK7/GRB2/PLCB3/MAP2K2/KRAS/ADCY3/SOS2/ADCY9/PLCB2/MAP2K3/GNRHR/CALM1
KEGG_MELANOGENESIS	KEGG_MELANOGENESIS	101	0.317021256451462	1.88901681458644	0.000133213556734389	0.000408521573985461	0.000163595595989601	8764	tags=43%, list=27%, signal=31%	FZD1/FZD7/CAMK2G/HRAS/CALM3/TCF7L2/GNAI1/RAF1/CAMK2D/WNT2B/KIT/LEF1/EP300/TCF7/MAPK3/FZD3/DVL2/DVL1/DVL3/MAPK1/TYRP1/FZD2/ADCY7/WNT11/FZD6/CTNNB1/CREB3L1/FZD4/CAMK2A/CREB3L4/CALM2/CREB1/CREB3/WNT8A/PLCB3/TCF7L1/GNAI2/WNT7B/MAP2K2/KRAS/ADCY3/ADCY9/PLCB2
KEGG_CARDIAC_MUSCLE_CONTRACTION	KEGG_CARDIAC_MUSCLE_CONTRACTION	72	0.357046583593591	1.94545565095861	0.000151742775198051	0.000457715912072809	0.000183295845795747	5107	tags=38%, list=16%, signal=32%	MYH6/SLC8A1/TPM2/MYH7/ATP2A2/COX4I1/UQCRH/ATP1A2/COX7A1/COX5B/CACNA2D1/COX7A2L/UQCRC2/UQCRC1/COX6B1/UQCRQ/CACNB2/COX7B/COX7C/UQCR10/CYC1/UQCR11/COX6C/TNNC1/CACNB1/COX8A/CACNA1D
KEGG_BASE_EXCISION_REPAIR	KEGG_BASE_EXCISION_REPAIR	33	0.47240301025094	2.1139178619097	0.000172652580840184	0.000504255156739584	0.000201932843087934	7330	tags=55%, list=23%, signal=42%	POLD2/POLD3/NEIL1/APEX1/POLE4/POLL/HMGB1/PARP3/PARP2/MPG/LIG3/PARP4/UNG/POLE3/LIG1/XRCC1/NTHL1/TDG
KEGG_HYPERTROPHIC_CARDIOMYOPATHY_HCM	KEGG_HYPERTROPHIC_CARDIOMYOPATHY_HCM	83	0.339323088847742	1.91841703282383	0.000171160198070934	0.000504255156739584	0.000201932843087934	7643	tags=40%, list=24%, signal=30%	DES/MYH6/SGCA/SLC8A1/TPM2/TGFB3/MYH7/ATP2A2/LAMA2/PRKAG2/PRKAB2/CACNA2D1/EMD/SGCG/ITGA9/CACNB2/ITGA7/SGCB/ITGB1/ITGA5/ITGA6/TNNC1/CACNB1/CACNA1D/TGFB1/LMNA/DAG1/ACTG1/ITGA1/ACTB/TGFB2/ITGA8/PRKAA2
KEGG_PHOSPHATIDYLINOSITOL_SIGNALING_SYSTEM	KEGG_PHOSPHATIDYLINOSITOL_SIGNALING_SYSTEM	76	0.350023720592186	1.93925304212927	0.000176681875100351	0.000507960390913509	0.000203416632516852	8144	tags=49%, list=25%, signal=36%	PI4KA/PIP5K1C/CALM3/DGKH/PIK3CA/INPPL1/PLCE1/PLCD1/DGKD/CDS2/PI4KB/CDIPT/INPP5A/DGKE/PIK3CB/PIK3R2/PLCD3/PLCG1/OCRL/INPP5D/PIP4K2B/SYNJ1/PIK3C3/INPP1/INPP4A/PIKFYVE/DGKG/PIP4K2A/INPP5E/CALM2/PIK3C2A/ITPR1/PTEN/PLCB3/ITPK1/ITPKB/INPP5B
KEGG_SNARE_INTERACTIONS_IN_VESICULAR_TRANSPORT	KEGG_SNARE_INTERACTIONS_IN_VESICULAR_TRANSPORT	38	0.458663959264062	2.13557460768472	0.00018694729326739	0.000529204645556919	0.000211924057145219	9097	tags=63%, list=28%, signal=45%	STX4/USE1/STX17/VAMP4/STX12/STX10/SNAP47/VTI1B/STX6/STX5/STX16/VAMP1/STX18/VAMP3/SNAP23/STX2/VAMP5/SEC22B/STX3/STX1A/SNAP29/GOSR1/VAMP8/BNIP1
KEGG_BUTANOATE_METABOLISM	KEGG_BUTANOATE_METABOLISM	34	0.475694535157535	2.13507676367869	0.000191485536286485	0.000533838464798687	0.000213779705582998	6160	tags=47%, list=19%, signal=38%	ALDH1B1/PDHA1/HADHA/HMGCS1/ALDH5A1/HADH/ACAT1/ALDH9A1/ALDH7A1/ALDH3A2/ALDH2/PDHB/OXCT1/ECHS1/HMGCS2/HMGCL
KEGG_GLYCEROPHOSPHOLIPID_METABOLISM	KEGG_GLYCEROPHOSPHOLIPID_METABOLISM	69	0.354250760212647	1.9197859881297	0.000212887470998732	0.000584646189011444	0.000234126048231127	6492	tags=43%, list=20%, signal=35%	PLD1/GPD1L/GPAT2/PLA2G2A/DGKH/PLA2G4A/JMJD7-PLA2G4B/MBOAT1/LPCAT3/LPCAT4/DGKD/CDS2/CDIPT/DGKE/LCLAT1/GNPAT/AGPAT4/PLD2/LCAT/PCYT1A/PLA2G12A/PEMT/LPGAT1/DGKG/MBOAT7/GPD2/PTDSS2/CHKB/CHPT1/LYPLA1
KEGG_LYSOSOME	KEGG_LYSOSOME	117	0.29074936047908	1.80374308376353	0.000249870980211031	0.000676121475865143	0.000270758028092449	9490	tags=50%, list=30%, signal=36%	HGSNAT/AP3M2/CTSK/CTSC/AP1M1/CTSF/MANBA/CTSG/LAMP1/SGSH/SUMF1/SMPD1/GGA3/SCARB2/HEXB/AP3S1/GNPTG/AP3S2/CTSS/ATP6V0A1/LGMN/AP3B1/ATP6V0B/CLTB/MFSD8/MCOLN1/AP4E1/ATP6V0D2/NEU1/CTSH/M6PR/CTSZ/CTSE/GUSB/CLTA/CD164/HEXA/LAMP2/ATP6V1H/CLN5/ATP6V0C/AP3M1/TCIRG1/PSAP/ARSG/ENTPD4/LAPTM4A/PPT2/GGA2/GALC/AP1G1/AP1S3/NPC2/NAGLU/ATP6AP1/GLB1/CD63/CTSD/AGA
KEGG_PROTEASOME	KEGG_PROTEASOME	43	0.42284491388947	2.05028644665723	0.000262651940555206	0.000700405174813882	0.000280482621492973	10580	tags=70%, list=33%, signal=47%	PSMC3/PSMC6/PSMC4/PSMB5/PSMD7/PSMD8/PSMB4/PSMA4/PSMC5/PSMB6/PSMD3/PSMD6/PSMD11/PSMB2/PSMB1/PSMC1/PSMD12/PSMA5/PSMA7/PSMD1/PSMD13/PSMD4/PSME1/PSMA3/PSMB8/PSMB3/POMP/PSMD2/PSMA6/PSMA2
KEGG_GLIOMA	KEGG_GLIOMA	65	0.358502530748464	1.92036478751034	0.000277213686194561	0.000728675975139988	0.000291803880204801	9176	tags=54%, list=29%, signal=39%	CAMK2G/SHC2/HRAS/CALM3/RAF1/CAMK2D/PIK3CA/AKT1/BRAF/CDK4/AKT3/PIK3CB/MAPK3/PIK3R2/MAPK1/PLCG1/IGF1R/CAMK2A/CALM2/CDKN1A/SHC1/E2F3/ARAF/PTEN/AKT2/GRB2/MAP2K2/PDGFRA/RB1/KRAS/SOS2/TP53/PDGFRB/PIK3R1/CALM1
KEGG_BASAL_TRANSCRIPTION_FACTORS	KEGG_BASAL_TRANSCRIPTION_FACTORS	33	0.447341709037671	2.00177308059409	0.000569269615264543	0.00147529027054473	0.000590791298273061	4688	tags=45%, list=15%, signal=39%	TAF1/TAF9B/STON1/GTF2F1/GTF2B/GTF2I/GTF2IRD1/TAF2/GTF2E2/GTF2H1/TAF7/TAF11/GTF2H3/GTF2F2/TAF4
KEGG_CELL_CYCLE	KEGG_CELL_CYCLE	124	0.275369576141067	1.72798061334021	0.000662501313474912	0.00169305891221366	0.000677998420222863	9727	tags=51%, list=30%, signal=36%	CDKN2C/TGFB3/ABL1/BUB3/CDKN1B/CDC26/ANAPC11/CUL1/CDC14B/SMAD4/CDK4/TFDP2/SKP2/YWHAG/CCND2/EP300/STAG1/ANAPC4/CDC14A/SMAD2/CCNH/CDK7/STAG2/MAD1L1/SMC1A/CDC16/ANAPC5/RBL2/CDKN1C/CDK2/RAD21/TGFB1/SMAD3/MCM3/WEE1/CDKN1A/YWHAQ/ANAPC10/ORC3/SMC1B/E2F3/SMC3/HDAC2/TGFB2/PRKDC/ANAPC7/SKP1/YWHAZ/TFDP1/ORC4/CDC23/RB1/RBX1/TP53/FZR1/E2F4/MAD2L2/CDKN2D/GADD45B/GADD45A/GADD45G/ANAPC13/YWHAH
KEGG_AMINO_SUGAR_AND_NUCLEOTIDE_SUGAR_METABOLISM	KEGG_AMINO_SUGAR_AND_NUCLEOTIDE_SUGAR_METABOLISM	42	0.416233705132691	1.99209794842055	0.000732517670070622	0.00184634590812321	0.00073938337281822	7508	tags=55%, list=23%, signal=42%	CYB5R1/PGM1/GFPT2/UAP1/MPI/UGDH/FPGT/PGM2/PMM1/HK2/CYB5R3/UGP2/GNPDA2/HK1/GPI/HEXB/GNPDA1/NAGK/NANS/PMM2/GNPNAT1/HEXA/PGM3
KEGG_CIRCADIAN_RHYTHM_MAMMAL	KEGG_CIRCADIAN_RHYTHM_MAMMAL	12	0.659435704773866	2.14136870240749	0.00110869378922273	0.00273500415047602	0.00109525337833708	7181	tags=75%, list=22%, signal=58%	NR1D1/CRY2/CRY1/PER3/BHLHE40/BHLHE41/PER1/NPAS2/PER2
KEGG_LONG_TERM_POTENTIATION	KEGG_LONG_TERM_POTENTIATION	69	0.324764614483486	1.75999214779803	0.00111481147437881	0.00273500415047602	0.00109525337833708	2798	tags=25%, list=9%, signal=23%	PPP1R12A/CAMK2G/HRAS/PPP1CC/PPP1CB/CALM3/GRIN2A/RAF1/ATF4/CAMK2D/RAP1A/BRAF/PPP3CC/PPP3CB/RAP1B/EP300/MAPK3
KEGG_EPITHELIAL_CELL_SIGNALING_IN_HELICOBACTER_PYLORI_INFECTION	KEGG_EPITHELIAL_CELL_SIGNALING_IN_HELICOBACTER_PYLORI_INFECTION	66	0.335860277449868	1.80934116998141	0.00123201500960022	0.00294403586709662	0.00117896173167485	9786	tags=45%, list=31%, signal=32%	MAPK10/IGSF5/JAM3/MAP2K4/JUN/ATP6V1D/NFKB1/NOD1/ATP6V1C1/PLCG1/CDC42/RAC1/ATP6V0A1/ATP6V1E1/ATP6V0B/SRC/MAPK14/ATP6V0D2/TJP1/NFKBIA/ATP6V1H/ATP6V0C/TCIRG1/IKBKG/ATP6V1G1/ATP6AP1/ATP6V0E1/ATP6V1F/ADAM10/MAPK8
KEGG_PPAR_SIGNALING_PATHWAY	KEGG_PPAR_SIGNALING_PATHWAY	69	0.323741371020498	1.75444689939401	0.00121708500783513	0.00294403586709662	0.00117896173167485	6996	tags=46%, list=22%, signal=36%	SORBS1/SCD/FABP3/SLC27A6/ILK/PLTP/FABP5/PPARG/FABP6/UBC/NR1H3/FABP4/PPARA/CD36/SLC27A2/RXRA/ACOX1/CYP4A22/ACSL5/PLIN1/ACADM/PDPK1/CPT1B/HMGCS2/RXRB/ACOX2/SLC27A4/ACAA1/ACOX3/SCP2/ACSL3/SLC27A5
KEGG_VASOPRESSIN_REGULATED_WATER_REABSORPTION	KEGG_VASOPRESSIN_REGULATED_WATER_REABSORPTION	44	0.390251619288935	1.92973074594411	0.00144175427775943	0.00340106137317609	0.00136198109909797	8579	tags=59%, list=27%, signal=43%	STX4/AQP3/DYNC2H1/RAB11B/DYNC1LI2/DCTN4/DYNC1I2/CREB3L1/DYNC1H1/DYNC1I1/ARHGDIA/RAB5A/RAB5B/CREB3L4/DCTN6/AVP/CREB1/DYNLL2/CREB3/CREB5/DYNC1LI1/DCTN2/DYNLL1/RAB11A/ADCY3/ADCY9
KEGG_AUTOIMMUNE_THYROID_DISEASE	KEGG_AUTOIMMUNE_THYROID_DISEASE	48	-0.425783	-1.83699	0.00148763688833002	0.00346487579054081	0.00138753607172687	8129	tags=44%, list=25%, signal=33%	HLA-DOA/IFNA21/IFNA4/TSHB/HLA-DRB4/CD80/IFNA10/IL2/TG/IL10/IFNA2/FASLG/HLA-A/TPO/HLA-G/IFNA8/HLA-DQA2/CGA/TSHR/HLA-DOB/IFNA14
KEGG_RNA_POLYMERASE	KEGG_RNA_POLYMERASE	27	0.456289623806274	1.91259620639491	0.00177110530852196	0.00407354220960051	0.00163128120521759	7782	tags=63%, list=24%, signal=48%	POLR1D/POLR3D/POLR2J/POLR2K/POLR2A/POLR1A/POLR3C/POLR3GL/POLR2I/POLR2E/POLR1B/POLR2C/POLR2G/POLR3A/POLR2B/POLR3B/POLR1C
KEGG_THYROID_CANCER	KEGG_THYROID_CANCER	29	0.455175109414962	1.95792808029101	0.00219620142165713	0.00498890199487545	0.00199784404829108	8584	tags=59%, list=27%, signal=43%	HRAS/TCF7L2/PPARG/BRAF/LEF1/TCF7/MAPK3/MAPK1/RXRA/CTNNB1/RXRB/CCDC6/TCF7L1/MAP2K2/TPR/KRAS/TP53
KEGG_PENTOSE_PHOSPHATE_PATHWAY	KEGG_PENTOSE_PHOSPHATE_PATHWAY	26	0.471207258413724	1.93333761104985	0.00252046821723522	0.00565568478013757	0.00226486232614205	6991	tags=58%, list=22%, signal=45%	PGM1/PGM2/FBP1/ALDOA/PFKL/TKT/G6PD/PGLS/RPE/GPI/RPIA/FBP2/DERA/PRPS1L1/PFKM
KEGG_GLUTATHIONE_METABOLISM	KEGG_GLUTATHIONE_METABOLISM	49	0.355976588561284	1.81057131683717	0.00328889494185268	0.0072910442084445	0.00291975454571576	6249	tags=41%, list=19%, signal=33%	GSTT1/GCLC/OPLAH/GSTM4/GSTM1/MGST2/GSTM2/GSTO2/GSTK1/GPX7/IDH1/G6PD/RRM1/IDH2/GSTO1/GSTA4/GPX2/MGST1/TXNDC12/SRM
KEGG_TRYPTOPHAN_METABOLISM	KEGG_TRYPTOPHAN_METABOLISM	38	0.374060445346173	1.74165415155417	0.00568206286239046	0.0124464234128553	0.00498426566876356	3011	tags=37%, list=9%, signal=33%	AOX1/ALDH1B1/MAOB/WARS2/MAOA/HADHA/HADH/ACAT1/ALDH9A1/CAT/AADAT/ALDH7A1/OGDH/ALDH3A2
KEGG_B_CELL_RECEPTOR_SIGNALING_PATHWAY	KEGG_B_CELL_RECEPTOR_SIGNALING_PATHWAY	74	0.28867485585843	1.57479818068399	0.00578511017335901	0.0125230620223301	0.00501495618743196	9074	tags=41%, list=28%, signal=29%	HRAS/NFATC4/VAV3/RAF1/PIK3CA/JUN/AKT1/PPP3CC/AKT3/PPP3CB/PIK3CB/MAPK3/NFATC2/PIK3R2/NFKB1/MAPK1/INPP5D/RAC1/CHP2/PPP3R1/PTPN6/NFKBIA/AKT2/GRB2/MAP2K2/IKBKG/KRAS/SOS2/NFAT5/PIK3R1
KEGG_OOCYTE_MEIOSIS	KEGG_OOCYTE_MEIOSIS	110	0.256005972730487	1.5351413226036	0.00591919484934098	0.0126643238637063	0.00507152557471076	8773	tags=42%, list=27%, signal=30%	PPP2R5D/CAMK2G/PPP1CC/PPP1CB/CALM3/AR/CDC26/ANAPC11/CUL1/CAMK2D/PPP3CC/PPP3CB/YWHAG/MAPK3/PPP2CA/ANAPC4/MAPK1/ADCY7/SMC1A/CPEB1/IGF1R/PGR/CDC16/PPP2CB/CHP2/ANAPC5/CAMK2A/CDK2/PPP2R5E/CALM2/YWHAQ/ANAPC10/SMC1B/SMC3/ITPR1/PPP2R5A/PPP3R1/ANAPC7/SKP1/YWHAZ/CDC23/ADCY3/RBX1/BTRC/ADCY9/RPS6KA3
KEGG_BLADDER_CANCER	KEGG_BLADDER_CANCER	40	0.369604960838631	1.73915100526507	0.00637334463106337	0.013326084228587	0.00533653258581861	8584	tags=55%, list=27%, signal=40%	DAPK3/HRAS/VEGFA/RAF1/RPS6KA5/BRAF/CDK4/MAPK3/MAPK1/RASSF1/FGFR3/VEGFB/DAPK2/CDKN1A/VEGFC/E2F3/ARAF/PGF/MAP2K2/RB1/KRAS/TP53
KEGG_MATURITY_ONSET_DIABETES_OF_THE_YOUNG	KEGG_MATURITY_ONSET_DIABETES_OF_THE_YOUNG	25	-0.470398	-1.73113	0.00632927135985983	0.013326084228587	0.00533653258581861	11381	tags=68%, list=35%, signal=44%	NKX6-1/GCK/IAPP/NEUROD1/ONECUT1/PAX4/NEUROG3/PDX1/FOXA3/HNF1A/SLC2A2/INS/HNF1B/PAX6/MNX1/HNF4G/FOXA2
KEGG_PRION_DISEASES	KEGG_PRION_DISEASES	35	0.384759579744457	1.75416697054721	0.00708781763468285	0.0146534656717039	0.00586809266029331	3542	tags=26%, list=11%, signal=23%	PRNP/HSPA1A/NCAM1/C7/MAPK3/SOD1/HSPA5/MAPK1/C6
KEGG_APOPTOSIS	KEGG_APOPTOSIS	86	0.268009294452593	1.52936456994932	0.00720068482463696	0.0147214000859244	0.00589529751724663	9972	tags=48%, list=31%, signal=33%	CYCS/BCL2/PRKAR1B/PIK3CA/AKT1/PPP3CC/CASP6/AKT3/PPP3CB/PIK3CB/PIK3R2/NFKB1/FAS/CHP2/IRAK1/CASP9/AIFM1/MYD88/PPP3R1/PRKAR2A/IRAK4/NFKBIA/AKT2/DFFA/IKBKG/PRKAR1A/TP53/BIRC2/IRAK2/IL1R1/IRAK3/CAPN2/RIPK1/PIK3R1/TNFRSF10A/XIAP/TRADD/BID/ENDOD1/FADD/BAD
KEGG_BETA_ALANINE_METABOLISM	KEGG_BETA_ALANINE_METABOLISM	22	0.444084770208888	1.74794425309854	0.00753557639706452	0.0152367698578008	0.00610168129316965	6249	tags=55%, list=19%, signal=44%	AOC3/ALDH1B1/HADHA/ALDH9A1/ALDH7A1/HIBCH/ALDH3A2/ALDH2/ACADM/ECHS1/MLYCD/SRM
KEGG_HEDGEHOG_SIGNALING_PATHWAY	KEGG_HEDGEHOG_SIGNALING_PATHWAY	56	0.309836650420545	1.61371365041999	0.0083406309156898	0.0166812618313796	0.00668013917732593	5289	tags=30%, list=16%, signal=25%	HHIP/RAB23/BMP5/GAS1/WNT2B/PTCH1/BMP7/BMP2/GLI3/SUFU/STK36/CSNK1G3/CSNK1A1/GLI1/WNT11/SMO/BMP8A
KEGG_DORSO_VENTRAL_AXIS_FORMATION	KEGG_DORSO_VENTRAL_AXIS_FORMATION	24	0.441375260950258	1.78345672620794	0.00844979073543728	0.0167178655410802	0.00669479741347606	8487	tags=58%, list=26%, signal=43%	SPIRE1/ETV7/MAPK3/MAPK1/CPEB1/NOTCH3/ETV6/ETS2/SPIRE2/NOTCH2/ETS1/GRB2/KRAS/SOS2
KEGG_FRUCTOSE_AND_MANNOSE_METABOLISM	KEGG_FRUCTOSE_AND_MANNOSE_METABOLISM	32	0.38930589555704	1.72166129709495	0.00889090933307108	0.0174034820987774	0.00696935781987654	8666	tags=56%, list=27%, signal=41%	MPI/FPGT/FBP1/PMM1/HK2/ALDOA/MTMR2/PFKL/TPI1/SORD/HK1/FBP2/PMM2/PFKM/PFKFB1/ALDOC/MTMR1/ALDOB
KEGG_OTHER_GLYCAN_DEGRADATION	KEGG_OTHER_GLYCAN_DEGRADATION	15	0.503276175373192	1.78383948779837	0.00941660397541755	0.0182384750681771	0.00730373715544852	9490	tags=60%, list=30%, signal=42%	MANBA/MAN2B2/FUCA2/HEXB/MAN2C1/NEU1/HEXA/GLB1/AGA
KEGG_PROGESTERONE_MEDIATED_OOCYTE_MATURATION	KEGG_PROGESTERONE_MEDIATED_OOCYTE_MATURATION	85	0.260551841339301	1.4845210390665	0.00987029039892759	0.0189180565979445	0.00757588078865056	9786	tags=48%, list=31%, signal=34%	HSP90AB1/MAPK10/GNAI1/HSP90AA1/CDC26/RAF1/ANAPC11/PIK3CA/AKT1/BRAF/AKT3/PIK3CB/MAPK3/PDE3B/ANAPC4/PIK3R2/MAPK1/ADCY7/CPEB1/IGF1R/PGR/CDC16/ANAPC5/CDK2/MAPK14/ANAPC10/ARAF/AKT2/ANAPC7/GNAI2/CDC23/KRAS/ADCY3/ADCY9/FZR1/RPS6KA3/PIK3R1/MAD2L2/ANAPC13/IGF1/MAPK8
KEGG_DNA_REPLICATION	KEGG_DNA_REPLICATION	36	0.355435860658645	1.63207143113405	0.0102368403069495	0.0194183362523577	0.00777622161135608	6876	tags=39%, list=21%, signal=31%	POLD2/POLD3/RFC5/RNASEH2C/POLE4/RPA4/POLA1/POLE3/RFC4/LIG1/MCM3/RPA2/SSBP1/RFC1
KEGG_T_CELL_RECEPTOR_SIGNALING_PATHWAY	KEGG_T_CELL_RECEPTOR_SIGNALING_PATHWAY	106	0.24373276129903	1.46139692383582	0.0111303274711311	0.0208977577008992	0.00836866727152715	5203	tags=26%, list=16%, signal=22%	HRAS/MAP2K7/CBLB/NFATC4/VAV3/RAF1/PAK3/PIK3CA/JUN/AKT1/PPP3CC/NCK1/CDK4/AKT3/PPP3CB/PIK3CB/MAPK3/NFATC2/PIK3R2/NFKB1/MAPK1/PLCG1/PAK6/CBLC/CDC42/PDPK1/CD8B/CHP2
KEGG_CHEMOKINE_SIGNALING_PATHWAY	KEGG_CHEMOKINE_SIGNALING_PATHWAY	182	0.207237489490041	1.39803422446878	0.0114488715977016	0.0212787108482534	0.00852122287973536	8764	tags=34%, list=27%, signal=25%	CCL14/CXCL12/PARD3/SHC2/HRAS/FOXO3/GNAI1/JAK2/PRKCD/VAV3/RAF1/GSK3A/STAT5B/PIK3CA/AKT1/RAP1A/BRAF/WASL/GNG12/AKT3/RAP1B/PIK3CB/MAPK3/GNB5/ROCK2/CRKL/PIK3R2/NFKB1/CXCR5/MAPK1/TIAM1/ADCY7/CXCR4/CDC42/RAC1/GNB4/GNB1/GNG10/GNG5/ROCK1/CCL3L3/PXN/CCL25/STAT2/SHC1/GNG8/NFKBIA/AKT2/ARRB1/GRB2/PLCB3/GNAI2/ELMO1/IKBKG/KRAS/ADCY3/SOS2/GRK4/ADCY9/CX3CR1/GNG4/PLCB2
KEGG_STEROID_BIOSYNTHESIS	KEGG_STEROID_BIOSYNTHESIS	16	0.495762492964483	1.79598177744904	0.0117588405086603	0.021636266535935	0.00866440879585499	3573	tags=44%, list=11%, signal=39%	LSS/NSDHL/MSMO1/CYP51A1/EBP/SQLE/FDFT1
KEGG_HISTIDINE_METABOLISM	KEGG_HISTIDINE_METABOLISM	27	0.394363256992209	1.65302393460754	0.0129297577478932	0.0235552022337856	0.00943286130643588	4539	tags=37%, list=14%, signal=32%	ALDH1B1/MAOB/MAOA/HNMT/ALDH9A1/ALDH7A1/ALDH3A2/METTL2B/ASPA/ALDH2
KEGG_ECM_RECEPTOR_INTERACTION	KEGG_ECM_RECEPTOR_INTERACTION	84	0.262666940011417	1.49059042383388	0.0147616552205422	0.0266288682409781	0.0106637344214443	7536	tags=36%, list=23%, signal=27%	LAMC3/LAMA4/COL6A2/THBS2/LAMA2/COL6A1/VWF/COL1A2/SDC1/COL5A1/ITGA9/LAMB2/COL1A1/ITGA7/CD36/TNC/ITGB1/ITGA5/ITGA6/COL11A1/COL3A1/CD44/LAMC1/COL6A6/COL5A2/COL4A2/DAG1/ITGA1/CD47/ITGA8
KEGG_ETHER_LIPID_METABOLISM	KEGG_ETHER_LIPID_METABOLISM	29	0.389406316035638	1.67502472134033	0.015916455111671	0.028288361432552	0.0113282911915254	6192	tags=41%, list=19%, signal=33%	PLD1/PAFAH1B1/PLA2G2A/PLA2G4A/JMJD7-PLA2G4B/LPCAT4/ENPP6/PLD2/ENPP2/PLA2G12A/AGPS/CHPT1
KEGG_TYPE_II_DIABETES_MELLITUS	KEGG_TYPE_II_DIABETES_MELLITUS	46	0.321487792026732	1.61166631989445	0.0159890738531816	0.028288361432552	0.0113282911915254	5241	tags=35%, list=16%, signal=29%	IRS1/SLC2A4/MAPK10/ABCC8/PRKCD/PIK3CA/HK2/PIK3CB/MAPK3/PIK3R2/MAPK1/SOCS2/HK1/PRKCE/CACNA1D/IRS2
KEGG_MELANOMA	KEGG_MELANOMA	71	0.270545954547506	1.47080243473057	0.0170093297358262	0.0298068254418288	0.0119363717444395	3451	tags=24%, list=11%, signal=21%	FGF10/FGF13/FGF14/FGF7/HRAS/FGFR1/FGF12/RAF1/PIK3CA/AKT1/BRAF/CDK4/AKT3/PIK3CB/MAPK3/PIK3R2/MAPK1
KEGG_N_GLYCAN_BIOSYNTHESIS	KEGG_N_GLYCAN_BIOSYNTHESIS	46	0.317731884737319	1.59283739565807	0.01813881769503	0.0314862495838256	0.0126089100164061	10372	tags=63%, list=32%, signal=43%	B4GALT3/DPM1/ALG9/MAN1B1/ALG10B/TUSC3/MGAT5/MAN1A2/MAN1C1/B4GALT2/ALG11/ALG8/RPN1/GANAB/ALG5/MAN2A1/DOLPP1/ALG6/DDOST/FUT8/STT3A/ALG14/DAD1/ALG13/RPN2/MGAT2/STT3B/ALG2/DPAGT1
KEGG_ADIPOCYTOKINE_SIGNALING_PATHWAY	KEGG_ADIPOCYTOKINE_SIGNALING_PATHWAY	66	0.281454036374862	1.51624472931752	0.0204367994095311	0.0351436550593807	0.014073546076411	7643	tags=38%, list=24%, signal=29%	IRS1/SLC2A1/PRKAG2/SLC2A4/MAPK10/CAMKK2/JAK2/PRKAB2/AKT1/AKT3/NFKB1/PPARA/CD36/RXRA/ACSL5/ADIPOR1/IRS2/CPT1B/RXRB/PPARGC1A/ACSL3/CPT1A/NFKBIA/AKT2/PRKAA2
KEGG_STARCH_AND_SUCROSE_METABOLISM	KEGG_STARCH_AND_SUCROSE_METABOLISM	38	0.338206689258332	1.57471631058194	0.0208784270616464	0.0355706535124346	0.0142445408802656	7292	tags=50%, list=23%, signal=39%	PGM1/GANC/PYGL/UGT2B15/ENPP1/UGDH/GYS1/PGM2/HK2/AGL/UGP2/HK1/GPI/GBE1/UGT2B11/PYGM/UGT1A6/GUSB/UGT1A8
KEGG_LEUKOCYTE_TRANSENDOTHELIAL_MIGRATION	KEGG_LEUKOCYTE_TRANSENDOTHELIAL_MIGRATION	114	0.229063598711797	1.39513365578473	0.0257182194816572	0.0434142420607791	0.0173855660426461	8498	tags=34%, list=26%, signal=25%	MYL9/MYL5/CXCL12/GNAI1/JAM3/VAV3/VASP/PIK3CA/CD99/RAP1A/CTNND1/RAP1B/VCL/PIK3CB/ROCK2/PIK3R2/PLCG1/ITGB1/ACTN4/CXCR4/CDC42/CTNNB1/CTNNA1/RAC1/MAPK14/ARHGAP5/ROCK1/PXN/RASSF5/ACTG1/EZR/ACTB/GNAI2/CLDN23/RAPGEF4/CLDN11/CLDN20/ACTN1/VCAM1
