# Supplementary material for: Integrated Transcriptomics and Machine Learning Identify NALCN and KCNQ1 as Key Ion Channel Genes in Kidney Stone Pathogenesis and Potential Therapeutic Targets
Source: Research Square preprint supplement (doi:10.21203/rs.3.rs-8883107/v1), 2026-02-20
Supplement: Supplementary file 2 [file 5df33b9cbb1ed900e20b829f.xlsx]

## Sheet: Supplementary table 1
	Supplementary Table 1: The list of ion channel-related genes.
Genes
KCNMA1
KCNN1
KCNN2
KCNN3
KCNN4
KCNT1
KCNT2
KCNU1
CATSPER1
CATSPER2
CATSPER3
CATSPER4
TPCN1
TPCN2
CNGA1
CNGA2
CNGA3
CNGA4
CNGB1
CNGB3
HCN1
HCN2
HCN3
HCN4
KCNJ1
KCNJ2
KCNJ12
KCNJ4
KCNJ14
KCNJ3
KCNJ6
KCNJ9
KCNJ5
KCNJ10
KCNJ15
KCNJ16
KCNJ8
KCNJ11
KCNJ13
RYR1
RYR2
RYR3
TRPA1
TRPC1
TRPC2
TRPC3
TRPC4
TRPC5
TRPC6
TRPC7
TRPM1
TRPM2
TRPM3
TRPM4
TRPM5
TRPM6
TRPM7
TRPM8
MCOLN1
MCOLN2
MCOLN3
PKD2
PKD2L1
PKD2L2
TRPV1
TRPV2
TRPV3
TRPV4
TRPV5
TRPV6
KCNK1
KCNK2
KCNK3
KCNK4
KCNK5
KCNK6
KCNK7
KCNK9
KCNK10
KCNK12
KCNK13
KCNK15
KCNK16
KCNK17
KCNK18
CACNA1S
CACNA1C
CACNA1D
CACNA1F
CACNA1A
CACNA1B
CACNA1E
CACNA1G
CACNA1H
CACNA1I
KCNA1
KCNA2
KCNA3
KCNA4
KCNA5
KCNA6
KCNA7
KCNA10
KCNB1
KCNB2
KCNC1
KCNC2
KCNC3
KCNC4
KCND1
KCND2
KCND3
KCNF1
KCNG1
KCNG2
KCNG3
KCNG4
KCNQ1
KCNQ2
KCNQ3
KCNQ4
KCNQ5
KCNV1
KCNV2
KCNS1
KCNS2
KCNS3
KCNH1
KCNH5
KCNH2
KCNH6
KCNH7
KCNH8
KCNH3
KCNH4
HVCN1
SCN1A
SCN2A
SCN3A
SCN4A
SCN5A
SCN8A
SCN9A
SCN10A
SCN11A
HTR3A
HTR3B
HTR3C
HTR3D
HTR3E
ASIC1
ASIC2
ASIC3
SCNN1A
SCNN1B
SCNN1G
SCNN1D
GABRA1
GABRA2
GABRA3
GABRA4
GABRA5
GABRA6
GABRB1
GABRB2
GABRB3
GABRG1
GABRG2
GABRG3
GABRD
GABRE
GABRQ
GABRP
GABRR1
GABRR2
GABRR3
GLRA1
GLRA2
GLRA3
GLRA4
GLRB
GRIA1
GRIA2
GRIA3
GRIA4
GRID1
GRID2
GRIK1
GRIK2
GRIK3
GRIK4
GRIK5
GRIN1
GRIN2A
GRIN2B
GRIN2C
GRIN2D
GRIN3A
GRIN3B
ITPR1
ITPR2
ITPR3
CHRNA1
CHRNA2
CHRNA3
CHRNA4
CHRNA5
CHRNA6
CHRNA7
CHRNA9
CHRNA10
CHRNB1
CHRNB2
CHRNB3
CHRNB4
CHRNG
CHRND
CHRNE
P2RX1
P2RX2
P2RX3
P2RX4
P2RX5
P2RX6
P2RX7
ZACN
MIP
AQP1
AQP2
AQP3
AQP4
AQP5
AQP6
AQP7
AQP8
AQP9
AQP10
AQP11
ANO1
CFTR
CLCN1
CLCN2
CLCNKA
CLCNKB
CLCN3
CLCN4
CLCN5
CLCN6
CLCN7
GJE1
GJB7
GJB2
GJB6
GJC3
GJB4
GJB3
GJB5
GJD3
GJB1
GJD2
GJA4
GJA5
GJD4
GJA1
GJC1
GJA3
GJC2
GJA8
GJA9
GJA10
PANX1
PANX2
PANX3
ORAI1
ORAI2
ORAI3
PIEZO1
PIEZO2
NALCN
