# Supplementary material for: Integrated Transcriptomics and Machine Learning Identify NALCN and KCNQ1 as Key Ion Channel Genes in Kidney Stone Pathogenesis and Potential Therapeutic Targets
Source: Research Square preprint supplement (doi:10.21203/rs.3.rs-8883107/v1), 2026-02-20
Supplement: Supplementary file 3 [file 5fd461bdd6dbf9e1d7c1054b.xlsx]

## Sheet: Supplementary table 3
	Supplementary Table 3: KEGG pathway enrichment analysis for candidate genes.
	category	subcategory	ID	Description	GeneRatio	BgRatio	pvalue	p.adjust	qvalue	geneID	Count
hsa04080	Environmental Information Processing	Signaling molecules and interaction	hsa04080	Neuroactive ligand-receptor interaction	27/63	370/9497	4.71894064872708e-22	1.51006100759266e-20	9.43788129745415e-21	GABRB1/P2RX3/GABRB3/GLRA1/GABRR2/CHRNA4/P2RX5/GABRR3/GRIA1/GABRA6/CHRNB4/CHRNG/P2RX7/GRID2/GRIK4/GABRA3/GABRR1/GRIN2C/GRIN2B/GRIK2/CHRNA2/GABRG3/CHRNA1/GLRA2/GRIA4/GRIK5/P2RX1	27
hsa04082	NA	NA	hsa04082	Neuroactive ligand signaling	23/63	199/9497	3.06980874965751e-23	1.9646775997808e-21	1.227923499863e-21	GABRB1/P2RX3/GABRB3/GLRA1/GABRR2/CHRNA4/P2RX5/GABRR3/GRIA1/GABRA6/CHRNB4/GRIK4/GABRA3/HTR3C/GABRR1/GRIN2C/GRIN2B/GRIK2/HTR3A/GABRG3/GRIA4/GRIK5/P2RX1	23
hsa05033	Human Diseases	Substance dependence	hsa05033	Nicotine addiction	13/63	41/9497	1.97414650896724e-19	4.21151255246344e-18	2.63219534528965e-18	GABRB1/GABRB3/GABRR2/CHRNA4/GABRR3/GRIA1/GABRA6/GABRA3/GABRR1/GRIN2C/GRIN2B/GABRG3/GRIA4	13
hsa04723	Organismal Systems	Nervous system	hsa04723	Retrograde endocannabinoid signaling	13/63	149/9497	1.09895265488214e-11	1.40665939824914e-10	8.79162123905711e-11	GABRB1/GABRB3/GABRR2/KCNJ6/GABRR3/GRIA1/GABRA6/CACNA1S/GABRA3/GABRR1/GABRG3/CACNA1F/GRIA4	13
hsa04727	Organismal Systems	Nervous system	hsa04727	GABAergic synapse	11/63	89/9497	1.07430483740417e-11	1.40665939824914e-10	8.79162123905711e-11	GABRB1/GABRB3/GABRR2/KCNJ6/GABRR3/GABRA6/CACNA1S/GABRA3/GABRR1/GABRG3/CACNA1F	11
hsa04742	Organismal Systems	Sensory system	hsa04742	Taste transduction	10/63	86/9497	1.87597278249913e-10	2.00103763466574e-09	1.25064852166609e-09	P2RX3/HCN4/PKD2L1/GABRA6/SCN2A/GABRA3/HTR3C/TRPM5/HTR3A/SCN9A	10
hsa05032	Human Diseases	Substance dependence	hsa05032	Morphine addiction	9/63	91/9497	7.05142349922153e-09	6.44701577071683e-08	4.02938485669802e-08	GABRB1/GABRB3/GABRR2/KCNJ6/GABRR3/GABRA6/GABRA3/GABRR1/GABRG3	9
hsa04726	Organismal Systems	Nervous system	hsa04726	Serotonergic synapse	9/63	115/9497	5.59037027609662e-08	4.4722962208773e-07	2.79518513804831e-07	GABRB1/GABRB3/KCNJ6/KCND2/CACNA1S/HTR3C/TRPC1/HTR3A/CACNA1F	9
hsa04024	Environmental Information Processing	Signal transduction	hsa04024	cAMP signaling pathway	9/63	226/9497	1.61574192942134e-05	8.61729029024713e-05	5.38580643140446e-05	HCN4/CNGB1/GRIA1/CACNA1S/HCN2/GRIN2C/GRIN2B/CACNA1F/GRIA4	9
hsa04020	Environmental Information Processing	Signal transduction	hsa04020	Calcium signaling pathway	9/63	254/9497	4.07121158637053e-05	0.000188695239398828	0.000117934524624267	P2RX3/P2RX5/CACNA1I/P2RX7/CACNA1S/GRIN2C/GRIN2B/CACNA1F/P2RX1	9
hsa04724	Organismal Systems	Nervous system	hsa04724	Glutamatergic synapse	8/63	116/9497	8.59974918670468e-07	5.0034904359009e-06	3.12718152243806e-06	GRIA1/GRIK4/GRIN2C/GRIN2B/GRIK2/TRPC1/GRIA4/GRIK5	8
hsa04725	Organismal Systems	Nervous system	hsa04725	Cholinergic synapse	8/63	116/9497	8.59974918670468e-07	5.0034904359009e-06	3.12718152243806e-06	KCNQ4/KCNJ6/KCNQ3/CHRNA4/KCNQ1/CHRNB4/CACNA1S/CACNA1F	8
hsa04929	Organismal Systems	Endocrine system	hsa04929	GnRH secretion	7/63	65/9497	2.06785665885849e-07	1.47047584629937e-06	9.19047403937106e-07	HCN1/KCNJ6/CACNA1I/CACNA1S/HCN2/TRPC1/CACNA1F	7
hsa04713	Organismal Systems	Environmental adaptation	hsa04713	Circadian entrainment	6/63	97/9497	4.12770836184936e-05	0.000188695239398828	0.000117934524624267	KCNJ6/GRIA1/CACNA1I/GRIN2C/GRIN2B/GRIA4	6
hsa04927	Organismal Systems	Endocrine system	hsa04927	Cortisol synthesis and secretion	5/63	65/9497	6.64930001535921e-05	0.000283703467321993	0.000177314667076246	KCNK3/CACNA1I/KCNA4/CACNA1S/CACNA1F	5
hsa04925	Organismal Systems	Endocrine system	hsa04925	Aldosterone synthesis and secretion	5/63	98/9497	0.000462310910934727	0.00184924364373891	0.00115577727733682	KCNK3/KCNK9/CACNA1I/CACNA1S/CACNA1F	5
hsa04728	Organismal Systems	Nervous system	hsa04728	Dopaminergic synapse	5/63	133/9497	0.00183242071873406	0.00651527366661	0.00407204604163125	KCNJ6/SCN1A/GRIA1/GRIN2B/GRIA4	5
hsa04934	Human Diseases	Endocrine and metabolic disease	hsa04934	Cushing syndrome	5/63	155/9497	0.00356339334553386	0.0120030091639035	0.0075018807274397	KCNK3/CACNA1I/KCNA4/CACNA1S/CACNA1F	5
hsa04022	Environmental Information Processing	Signal transduction	hsa04022	cGMP-PKG signaling pathway	5/63	166/9497	0.00477007950821755	0.0152642544262962	0.0095401590164351	CNGB1/KCNJ8/CACNA1S/TRPC6/CACNA1F	5
hsa05031	Human Diseases	Substance dependence	hsa05031	Amphetamine addiction	4/63	69/9497	0.00110096311085759	0.00414480229969915	0.00259050143731197	GRIA1/GRIN2C/GRIN2B/GRIA4	4
hsa05017	Human Diseases	Neurodegenerative disease	hsa05017	Spinocerebellar ataxia	4/63	144/9497	0.0151329126238511	0.0421089742576726	0.0263181089110454	KCNC3/GRIA1/GRIN2C/GRIN2B	4
hsa04720	Organismal Systems	Nervous system	hsa04720	Long-term potentiation	3/63	67/9497	0.00985773460712341	0.0300426197550428	0.0187766373469017	GRIA1/GRIN2C/GRIN2B	3
hsa04971	Organismal Systems	Digestive system	hsa04971	Gastric acid secretion	3/63	76/9497	0.0138706281652427	0.0403509182988879	0.0252193239368049	KCNJ10/KCNK10/KCNQ1	3
