# Supplementary material for: Integrated Transcriptomics and Machine Learning Identify NALCN and KCNQ1 as Key Ion Channel Genes in Kidney Stone Pathogenesis and Potential Therapeutic Targets
Source: Research Square preprint supplement (doi:10.21203/rs.3.rs-8883107/v1), 2026-02-20
Supplement: Supplementary file 4 [file ae477e0956ad563f05f351d2.xlsx]

## Sheet: Supplementary table 4
	Supplementary Table 4: GO functional enrichment analysis for candidate genes
	ONTOLOGY	ID	Description	GeneRatio	BgRatio	pvalue	p.adjust	qvalue	geneID	Count
GO:0015267	MF	GO:0015267	channel activity	87/92	478/18369	1.75351900362723e-134	1.53160221787128e-132	6.08807653772903e-133	GJC1/NALCN/GABRB1/AQP10/KCNV2/KCNA10/P2RX3/KCNJ10/GABRB3/HCN1/KCNQ4/TRPV5/GLRA1/KCNA6/KCNK10/TRPM3/CLCN7/KCNJ6/KCNQ3/KCNK3/AQP5/SCNN1D/KCNK16/KCNC3/HCN4/KCNC4/CHRNA4/CATSPER4/SCN1A/PKD2L1/CNGB1/P2RX5/KCNQ1/CLCN1/SCN10A/KCNV1/GRIA1/GJA3/KCNJ8/GABRA6/SCN2A/KCNK12/KCND2/KCNK9/CHRNB4/KCNH3/CHRNG/CACNA1I/P2RX7/KCNK13/KCNA4/TRPM8/CACNA1S/TRPC6/GRID2/GRIK4/GABRA3/KCNH8/CLCNKB/HTR3C/HCN2/GABRR1/GRIN2C/KC…	87
GO:0022803	MF	GO:0022803	passive transmembrane transporter activity	87/92	479/18369	2.14210100401577e-134	1.53160221787128e-132	6.08807653772903e-133	GJC1/NALCN/GABRB1/AQP10/KCNV2/KCNA10/P2RX3/KCNJ10/GABRB3/HCN1/KCNQ4/TRPV5/GLRA1/KCNA6/KCNK10/TRPM3/CLCN7/KCNJ6/KCNQ3/KCNK3/AQP5/SCNN1D/KCNK16/KCNC3/HCN4/KCNC4/CHRNA4/CATSPER4/SCN1A/PKD2L1/CNGB1/P2RX5/KCNQ1/CLCN1/SCN10A/KCNV1/GRIA1/GJA3/KCNJ8/GABRA6/SCN2A/KCNK12/KCND2/KCNK9/CHRNB4/KCNH3/CHRNG/CACNA1I/P2RX7/KCNK13/KCNA4/TRPM8/CACNA1S/TRPC6/GRID2/GRIK4/GABRA3/KCNH8/CLCNKB/HTR3C/HCN2/GABRR1/GRIN2C/KC…	87
GO:0005216	MF	GO:0005216	monoatomic ion channel activity	81/92	432/18369	2.08025816723744e-122	9.91589726383182e-121	3.94154179055516e-121	GJC1/NALCN/GABRB1/KCNV2/KCNA10/P2RX3/KCNJ10/GABRB3/HCN1/KCNQ4/TRPV5/GLRA1/KCNA6/KCNK10/TRPM3/CLCN7/KCNJ6/KCNQ3/KCNK3/SCNN1D/KCNK16/KCNC3/HCN4/KCNC4/CHRNA4/CATSPER4/SCN1A/PKD2L1/CNGB1/P2RX5/KCNQ1/CLCN1/SCN10A/KCNV1/GRIA1/KCNJ8/GABRA6/SCN2A/KCNK12/KCND2/KCNK9/CHRNB4/KCNH3/CHRNG/CACNA1I/P2RX7/KCNK13/KCNA4/TRPM8/CACNA1S/TRPC6/GRID2/GRIK4/GABRA3/KCNH8/CLCNKB/HTR3C/HCN2/GABRR1/GRIN2C/KCNK15/GRIN2B/KCNT…	81
GO:0022836	MF	GO:0022836	gated channel activity	68/92	308/18369	4.10279095527144e-103	1.17339821320763e-101	4.66422550704543e-102	NALCN/GABRB1/KCNV2/KCNA10/P2RX3/KCNJ10/GABRB3/HCN1/GLRA1/KCNA6/CLCN7/KCNJ6/KCNQ3/KCNK3/SCNN1D/KCNC3/HCN4/KCNC4/CHRNA4/CATSPER4/SCN1A/PKD2L1/CNGB1/P2RX5/KCNQ1/CLCN1/SCN10A/KCNV1/GRIA1/KCNJ8/GABRA6/SCN2A/KCND2/CHRNB4/KCNH3/CHRNG/CACNA1I/P2RX7/KCNA4/TRPM8/CACNA1S/GRID2/GRIK4/GABRA3/KCNH8/CLCNKB/HTR3C/HCN2/GABRR1/GRIN2C/GRIN2B/KCNT1/TRPM2/GRIK2/KCNH6/TRPM5/CHRNA2/HTR3A/GABRG3/KCNG4/CACNA1F/CHRNA1/GLR…	68
GO:0022839	MF	GO:0022839	monoatomic ion gated channel activity	68/92	308/18369	4.10279095527144e-103	1.17339821320763e-101	4.66422550704543e-102	NALCN/GABRB1/KCNV2/KCNA10/P2RX3/KCNJ10/GABRB3/HCN1/GLRA1/KCNA6/CLCN7/KCNJ6/KCNQ3/KCNK3/SCNN1D/KCNC3/HCN4/KCNC4/CHRNA4/CATSPER4/SCN1A/PKD2L1/CNGB1/P2RX5/KCNQ1/CLCN1/SCN10A/KCNV1/GRIA1/KCNJ8/GABRA6/SCN2A/KCND2/CHRNB4/KCNH3/CHRNG/CACNA1I/P2RX7/KCNA4/TRPM8/CACNA1S/GRID2/GRIK4/GABRA3/KCNH8/CLCNKB/HTR3C/HCN2/GABRR1/GRIN2C/GRIN2B/KCNT1/TRPM2/GRIK2/KCNH6/TRPM5/CHRNA2/HTR3A/GABRG3/KCNG4/CACNA1F/CHRNA1/GLR…	68
GO:0005261	MF	GO:0005261	monoatomic cation channel activity	66/92	324/18369	6.62380903765016e-97	1.57867448730662e-95	6.27518750935278e-96	NALCN/KCNV2/KCNA10/P2RX3/KCNJ10/HCN1/KCNQ4/TRPV5/KCNA6/KCNK10/TRPM3/KCNJ6/KCNQ3/KCNK3/SCNN1D/KCNK16/KCNC3/HCN4/KCNC4/CHRNA4/CATSPER4/SCN1A/PKD2L1/CNGB1/P2RX5/KCNQ1/SCN10A/KCNV1/KCNJ8/SCN2A/KCNK12/KCND2/KCNK9/CHRNB4/KCNH3/CHRNG/CACNA1I/P2RX7/KCNK13/KCNA4/TRPM8/CACNA1S/TRPC6/GRIK4/KCNH8/HTR3C/HCN2/GRIN2C/KCNK15/GRIN2B/KCNT1/TRPM2/GRIK2/TRPC1/KCNH6/TRPM5/CHRNA2/HTR3A/KCNG4/CACNA1F/CHRNA1/GRIK5/SCN9A…	66
GO:0034702	CC	GO:0034702	ion channel complex	57/93	299/19518	6.40887764537996e-81	9.80558279743134e-79	5.39694959610944e-79	GABRB1/KCNV2/KCNA10/GABRB3/HCN1/GLRA1/KCNA6/CLCN7/GABRR2/KCNJ6/KCNQ3/SCNN1D/KCNC3/HCN4/KCNC4/CHRNA4/CATSPER4/SCN1A/PKD2L1/CNGB1/KCNQ1/GABRR3/CLCN1/SCN10A/KCNV1/GRIA1/KCNJ8/GABRA6/SCN2A/KCND2/CHRNB4/CACNA1I/KCNA4/CACNA1S/TRPC6/GRID2/GRIK4/GABRA3/CLCNKB/HTR3C/HCN2/GABRR1/GRIN2C/GRIN2B/GRIK2/TRPC1/CHRNA2/HTR3A/GABRG3/KCNG4/CACNA1F/CHRNA1/GLRA2/GRIA4/GRIK5/SCN9A/KCNA1	57
GO:1902495	CC	GO:1902495	transmembrane transporter complex	57/93	392/19518	1.13810306368611e-73	8.70648843719873e-72	4.79201289973099e-72	GABRB1/KCNV2/KCNA10/GABRB3/HCN1/GLRA1/KCNA6/CLCN7/GABRR2/KCNJ6/KCNQ3/SCNN1D/KCNC3/HCN4/KCNC4/CHRNA4/CATSPER4/SCN1A/PKD2L1/CNGB1/KCNQ1/GABRR3/CLCN1/SCN10A/KCNV1/GRIA1/KCNJ8/GABRA6/SCN2A/KCND2/CHRNB4/CACNA1I/KCNA4/CACNA1S/TRPC6/GRID2/GRIK4/GABRA3/CLCNKB/HTR3C/HCN2/GABRR1/GRIN2C/GRIN2B/GRIK2/TRPC1/CHRNA2/HTR3A/GABRG3/KCNG4/CACNA1F/CHRNA1/GLRA2/GRIA4/GRIK5/SCN9A/KCNA1	57
GO:1990351	CC	GO:1990351	transporter complex	57/93	418/19518	5.57757916275084e-72	2.84456537300293e-70	1.56563625621076e-70	GABRB1/KCNV2/KCNA10/GABRB3/HCN1/GLRA1/KCNA6/CLCN7/GABRR2/KCNJ6/KCNQ3/SCNN1D/KCNC3/HCN4/KCNC4/CHRNA4/CATSPER4/SCN1A/PKD2L1/CNGB1/KCNQ1/GABRR3/CLCN1/SCN10A/KCNV1/GRIA1/KCNJ8/GABRA6/SCN2A/KCND2/CHRNB4/CACNA1I/KCNA4/CACNA1S/TRPC6/GRID2/GRIK4/GABRA3/CLCNKB/HTR3C/HCN2/GABRR1/GRIN2C/GRIN2B/GRIK2/TRPC1/CHRNA2/HTR3A/GABRG3/KCNG4/CACNA1F/CHRNA1/GLRA2/GRIA4/GRIK5/SCN9A/KCNA1	57
GO:0042391	BP	GO:0042391	regulation of membrane potential	56/93	433/18614	5.02919917921958e-68	5.19013355295461e-65	3.95453872302845e-65	GJC1/NALCN/GABRB1/P2RX3/KCNJ10/GABRB3/HCN1/GLRA1/KCNK10/GABRR2/KCNQ3/KCNK3/KCNK16/HCN4/CHRNA4/SCN1A/CNGB1/P2RX5/KCNQ1/GABRR3/CLCN1/SCN10A/GRIA1/KCNJ8/GABRA6/KCNK12/KCND2/KCNK9/CHRNB4/KCNH3/CHRNG/P2RX7/KCNK13/KCNA4/GRID2/GRIK4/GABRA3/KCNH8/HTR3C/HCN2/GABRR1/GRIN2C/KCNK15/GRIN2B/GRIK2/KCNH6/CHRNA2/HTR3A/GABRG3/CHRNA1/GLRA2/GRIA4/GRIK5/SCN9A/KCNA1/P2RX1	56
GO:0046873	MF	GO:0046873	metal ion transmembrane transporter activity	54/92	435/18369	2.70769153447187e-64	5.53142699184967e-63	2.19872696032302e-63	NALCN/KCNV2/KCNA10/KCNJ10/HCN1/KCNQ4/TRPV5/KCNA6/KCNK10/TRPM3/KCNJ6/KCNQ3/KCNK3/SCNN1D/KCNK16/KCNC3/HCN4/KCNC4/CATSPER4/SCN1A/PKD2L1/KCNQ1/SCN10A/KCNV1/KCNJ8/SCN2A/KCNK12/KCND2/KCNK9/KCNH3/CACNA1I/KCNK13/KCNA4/TRPM8/CACNA1S/TRPC6/GRIK4/KCNH8/HCN2/GRIN2C/KCNK15/GRIN2B/KCNT1/TRPM2/GRIK2/TRPC1/KCNH6/TRPM5/KCNG4/CACNA1F/GRIK5/SCN9A/KCNA1/TRPM1	54
GO:0034765	BP	GO:0034765	regulation of monoatomic ion transmembrane transport	48/93	478/18614	1.17101846160353e-51	6.04245526187424e-49	4.60395153062021e-49	NALCN/KCNV2/KCNA10/P2RX3/KCNJ10/HCN1/KCNQ4/KCNA6/KCNK10/KCNJ6/KCNQ3/KCNK3/KCNK16/KCNC3/HCN4/KCNC4/CATSPER4/SCN1A/P2RX5/KCNQ1/CLCN1/SCN10A/KCNV1/KCNJ8/SCN2A/KCNK12/KCND2/KCNH3/CACNA1I/P2RX7/KCNK13/KCNA4/CACNA1S/TRPC6/KCNH8/CLCNKB/HCN2/GRIN2C/KCNK15/GRIN2B/TRPC1/KCNH6/TRPM5/KCNG4/CACNA1F/SCN9A/KCNA1/P2RX1	48
GO:0015276	MF	GO:0015276	ligand-gated monoatomic ion channel activity	40/92	140/18369	5.88749686973507e-62	9.35457835969017e-61	3.71841907562215e-61	GABRB1/KCNA10/P2RX3/KCNJ10/GABRB3/HCN1/GLRA1/KCNJ6/SCNN1D/HCN4/CHRNA4/CNGB1/P2RX5/GRIA1/KCNJ8/GABRA6/CHRNB4/CHRNG/P2RX7/TRPM8/GRID2/GRIK4/GABRA3/HTR3C/HCN2/GABRR1/GRIN2C/GRIN2B/TRPM2/GRIK2/KCNH6/TRPM5/CHRNA2/HTR3A/GABRG3/CHRNA1/GLRA2/GRIA4/GRIK5/P2RX1	40
GO:0022834	MF	GO:0022834	ligand-gated channel activity	40/92	140/18369	5.88749686973507e-62	9.35457835969017e-61	3.71841907562215e-61	GABRB1/KCNA10/P2RX3/KCNJ10/GABRB3/HCN1/GLRA1/KCNJ6/SCNN1D/HCN4/CHRNA4/CNGB1/P2RX5/GRIA1/KCNJ8/GABRA6/CHRNB4/CHRNG/P2RX7/TRPM8/GRID2/GRIK4/GABRA3/HTR3C/HCN2/GABRR1/GRIN2C/GRIN2B/TRPM2/GRIK2/KCNH6/TRPM5/CHRNA2/HTR3A/GABRG3/CHRNA1/GLRA2/GRIA4/GRIK5/P2RX1	40
GO:0005244	MF	GO:0005244	voltage-gated monoatomic ion channel activity	38/92	189/18369	3.77003363874359e-52	4.49262341950277e-51	1.78580540782591e-51	NALCN/KCNV2/KCNA10/KCNJ10/HCN1/KCNA6/CLCN7/KCNJ6/KCNQ3/KCNK3/KCNC3/HCN4/KCNC4/CATSPER4/SCN1A/KCNQ1/CLCN1/SCN10A/KCNV1/KCNJ8/SCN2A/KCND2/KCNH3/CACNA1I/KCNA4/CACNA1S/KCNH8/CLCNKB/HCN2/GRIN2C/GRIN2B/KCNT1/KCNH6/TRPM5/KCNG4/CACNA1F/SCN9A/KCNA1	38
GO:0022832	MF	GO:0022832	voltage-gated channel activity	38/92	189/18369	3.77003363874359e-52	4.49262341950277e-51	1.78580540782591e-51	NALCN/KCNV2/KCNA10/KCNJ10/HCN1/KCNA6/CLCN7/KCNJ6/KCNQ3/KCNK3/KCNC3/HCN4/KCNC4/CATSPER4/SCN1A/KCNQ1/CLCN1/SCN10A/KCNV1/KCNJ8/SCN2A/KCND2/KCNH3/CACNA1I/KCNA4/CACNA1S/KCNH8/CLCNKB/HCN2/GRIN2C/GRIN2B/KCNT1/KCNH6/TRPM5/KCNG4/CACNA1F/SCN9A/KCNA1	38
GO:0034703	CC	GO:0034703	cation channel complex	35/93	192/19518	6.43322343873702e-47	2.46070796531691e-45	1.35436282920779e-45	KCNV2/KCNA10/HCN1/KCNA6/KCNJ6/KCNQ3/SCNN1D/KCNC3/HCN4/KCNC4/CATSPER4/SCN1A/PKD2L1/CNGB1/KCNQ1/SCN10A/KCNV1/KCNJ8/SCN2A/KCND2/CACNA1I/KCNA4/CACNA1S/TRPC6/GRIK4/HTR3C/HCN2/GRIK2/TRPC1/HTR3A/KCNG4/CACNA1F/GRIK5/SCN9A/KCNA1	35
GO:0005267	MF	GO:0005267	potassium channel activity	35/92	121/18369	4.51275237201145e-54	6.45323589197637e-53	2.5651434535644e-53	KCNV2/KCNA10/KCNJ10/HCN1/KCNQ4/KCNA6/KCNK10/KCNJ6/KCNQ3/KCNK3/KCNK16/KCNC3/HCN4/KCNC4/PKD2L1/KCNQ1/KCNV1/KCNJ8/KCNK12/KCND2/KCNK9/KCNH3/KCNK13/KCNA4/GRIK4/KCNH8/HCN2/KCNK15/KCNT1/GRIK2/KCNH6/TRPM5/KCNG4/GRIK5/KCNA1	35
GO:0015079	MF	GO:0015079	potassium ion transmembrane transporter activity	35/92	157/18369	1.4378965063627e-49	1.58168615699897e-48	6.28715881324583e-49	KCNV2/KCNA10/KCNJ10/HCN1/KCNQ4/KCNA6/KCNK10/KCNJ6/KCNQ3/KCNK3/KCNK16/KCNC3/HCN4/KCNC4/PKD2L1/KCNQ1/KCNV1/KCNJ8/KCNK12/KCND2/KCNK9/KCNH3/KCNK13/KCNA4/GRIK4/KCNH8/HCN2/KCNK15/KCNT1/GRIK2/KCNH6/TRPM5/KCNG4/GRIK5/KCNA1	35
GO:0006813	BP	GO:0006813	potassium ion transport	33/93	241/18614	4.32659206966604e-39	1.11626075397384e-36	8.50516914747509e-37	NALCN/KCNV2/KCNA10/KCNJ10/HCN1/KCNQ4/KCNA6/KCNK10/KCNJ6/KCNQ3/KCNK3/KCNK16/KCNC3/HCN4/KCNC4/PKD2L1/KCNQ1/KCNV1/KCNJ8/KCNK12/KCND2/KCNK9/KCNH3/KCNK13/KCNA4/KCNH8/HCN2/KCNK15/KCNT1/KCNH6/TRPM5/KCNG4/KCNA1	33
GO:0097060	CC	GO:0097060	synaptic membrane	33/93	390/19518	1.15843155466784e-32	3.54480055728359e-31	1.95104261838794e-31	GABRB1/P2RX3/GABRB3/HCN1/GLRA1/GABRR2/KCNC3/CHRNA4/GABRR3/SCN10A/GRIA1/KCNJ8/GABRA6/SCN2A/KCND2/CHRNB4/CHRNG/GRID2/GRIK4/GABRA3/GABRR1/GRIN2C/GRIN2B/GRIK2/CHRNA2/HTR3A/GABRG3/CHRNA1/GLRA2/GRIA4/GRIK5/KCNA1/P2RX1	33
GO:0071805	BP	GO:0071805	potassium ion transmembrane transport	32/93	217/18614	6.01351675031518e-39	1.24118985726505e-36	9.45704634207461e-37	NALCN/KCNV2/KCNA10/KCNJ10/HCN1/KCNA6/KCNK10/KCNJ6/KCNQ3/KCNK3/KCNK16/KCNC3/HCN4/KCNC4/PKD2L1/KCNQ1/KCNV1/KCNJ8/KCNK12/KCND2/KCNK9/KCNH3/KCNK13/KCNA4/KCNH8/HCN2/KCNK15/KCNT1/KCNH6/TRPM5/KCNG4/KCNA1	32
GO:0060078	BP	GO:0060078	regulation of postsynaptic membrane potential	31/93	148/18614	8.71000573841356e-43	2.99624197401427e-40	2.28293834617366e-40	GABRB1/P2RX3/GABRB3/HCN1/GLRA1/GABRR2/CHRNA4/P2RX5/GABRR3/GRIA1/GABRA6/KCND2/CHRNB4/CHRNG/P2RX7/GRID2/GRIK4/GABRA3/HTR3C/GABRR1/GRIN2C/GRIN2B/GRIK2/CHRNA2/HTR3A/GABRG3/CHRNA1/GLRA2/GRIK5/KCNA1/P2RX1	31
GO:0022843	MF	GO:0022843	voltage-gated monoatomic cation channel activity	31/92	140/18369	1.30307201083336e-43	1.24226198366113e-42	4.9379570936843e-43	KCNV2/KCNA10/KCNJ10/HCN1/KCNA6/KCNJ6/KCNQ3/KCNK3/KCNC3/HCN4/KCNC4/CATSPER4/SCN1A/KCNQ1/SCN10A/KCNV1/KCNJ8/SCN2A/KCND2/KCNH3/CACNA1I/KCNA4/CACNA1S/KCNH8/HCN2/KCNT1/KCNH6/KCNG4/CACNA1F/SCN9A/KCNA1	31
GO:0045211	CC	GO:0045211	postsynaptic membrane	29/93	277/19518	2.67690502534667e-31	6.82610781463402e-30	3.75705968469709e-30	GABRB1/GABRB3/HCN1/GLRA1/GABRR2/KCNC3/CHRNA4/GABRR3/GRIA1/GABRA6/KCND2/CHRNB4/CHRNG/GRID2/GRIK4/GABRA3/GABRR1/GRIN2C/GRIN2B/GRIK2/CHRNA2/HTR3A/GABRG3/CHRNA1/GLRA2/GRIA4/GRIK5/KCNA1/P2RX1	29
GO:0099094	MF	GO:0099094	ligand-gated monoatomic cation channel activity	29/92	108/18369	1.81233142197049e-43	1.61977120838612e-42	6.43854584121095e-43	KCNA10/P2RX3/KCNJ10/HCN1/KCNJ6/SCNN1D/HCN4/CHRNA4/CNGB1/P2RX5/KCNJ8/CHRNB4/CHRNG/P2RX7/TRPM8/GRIK4/HTR3C/HCN2/GRIN2C/GRIN2B/TRPM2/GRIK2/KCNH6/TRPM5/CHRNA2/HTR3A/CHRNA1/GRIK5/P2RX1	29
GO:0060079	BP	GO:0060079	excitatory postsynaptic potential	26/93	124/18614	8.76207916937079e-36	1.50707761713178e-33	1.14829353324912e-33	GABRB1/P2RX3/GABRB3/GLRA1/GABRR2/CHRNA4/P2RX5/GABRR3/GABRA6/CHRNB4/CHRNG/P2RX7/GRID2/GABRA3/HTR3C/GABRR1/GRIN2C/GRIN2B/GRIK2/CHRNA2/HTR3A/GABRG3/CHRNA1/GLRA2/GRIK5/P2RX1	26
GO:0099565	BP	GO:0099565	chemical synaptic transmission, postsynaptic	26/93	132/18614	5.20258091384445e-35	7.67009071869638e-33	5.84410216938617e-33	GABRB1/P2RX3/GABRB3/GLRA1/GABRR2/CHRNA4/P2RX5/GABRR3/GABRA6/CHRNB4/CHRNG/P2RX7/GRID2/GABRA3/HTR3C/GABRR1/GRIN2C/GRIN2B/GRIK2/CHRNA2/HTR3A/GABRG3/CHRNA1/GLRA2/GRIK5/P2RX1	26
GO:0005230	MF	GO:0005230	extracellular ligand-gated monoatomic ion channel activity	26/92	67/18369	7.41983788290417e-44	7.57883440896641e-43	3.01256575696861e-43	GABRB1/P2RX3/GABRB3/GLRA1/CHRNA4/P2RX5/GRIA1/GABRA6/CHRNB4/CHRNG/P2RX7/GRID2/GRIK4/GABRA3/HTR3C/GRIN2C/GRIN2B/GRIK2/CHRNA2/HTR3A/GABRG3/CHRNA1/GLRA2/GRIA4/GRIK5/P2RX1	26
GO:0006816	BP	GO:0006816	calcium ion transport	25/93	455/18614	1.71063519192425e-19	1.17691701204388e-17	8.9673297429292e-18	NALCN/P2RX3/TRPV5/TRPM3/CHRNA4/CATSPER4/SCN1A/PKD2L1/P2RX5/SCN10A/SCN2A/CACNA1I/P2RX7/TRPM8/CACNA1S/TRPC6/GRIN2C/GRIN2B/TRPM2/TRPC1/TRPM5/CACNA1F/SCN9A/P2RX1/TRPM1	25
GO:0030594	MF	GO:0030594	neurotransmitter receptor activity	25/92	98/18369	9.10858622575918e-37	7.66192841343272e-36	3.04559539437149e-36	GABRB1/GABRB3/GLRA1/GABRR2/CHRNA4/GABRR3/GRIA1/GABRA6/CHRNB4/CHRNG/GRID2/GRIK4/GABRA3/HTR3C/GABRR1/GRIN2C/GRIN2B/GRIK2/CHRNA2/HTR3A/GABRG3/CHRNA1/GLRA2/GRIA4/GRIK5	25
GO:0070588	BP	GO:0070588	calcium ion transmembrane transport	24/93	360/18614	1.13086927872835e-20	9.72547579706382e-19	7.41016974745683e-19	NALCN/P2RX3/TRPV5/TRPM3/CATSPER4/SCN1A/PKD2L1/P2RX5/SCN10A/SCN2A/CACNA1I/P2RX7/TRPM8/CACNA1S/TRPC6/GRIN2C/GRIN2B/TRPM2/TRPC1/TRPM5/CACNA1F/SCN9A/P2RX1/TRPM1	24
GO:0005249	MF	GO:0005249	voltage-gated potassium channel activity	23/92	88/18369	4.27437299012382e-34	3.05617668793853e-33	1.21482179719309e-33	KCNV2/KCNA10/KCNJ10/HCN1/KCNA6/KCNJ6/KCNQ3/KCNK3/KCNC3/HCN4/KCNC4/KCNQ1/KCNV1/KCNJ8/KCND2/KCNH3/KCNA4/KCNH8/HCN2/KCNT1/KCNH6/KCNG4/KCNA1	23
GO:0051259	BP	GO:0051259	protein complex oligomerization	21/93	248/18614	2.78254969111903e-20	2.05745847118787e-18	1.56764736635795e-18	AQP10/KCNV2/KCNA10/P2RX3/HCN1/TRPV5/KCNA6/TRPM3/AQP5/KCNC3/KCNC4/PKD2L1/KCNV1/KCND2/KCNA4/GRIN2B/TRPM2/KCNG4/MIP/KCNA1/TRPM1	21
GO:0022824	MF	GO:0022824	transmitter-gated monoatomic ion channel activity	21/92	56/18369	4.98049292777064e-35	3.74847625616422e-34	1.4900089645408e-34	GABRB1/GABRB3/CHRNA4/GRIA1/GABRA6/CHRNB4/CHRNG/GRID2/GRIK4/GABRA3/HTR3C/GRIN2C/GRIN2B/GRIK2/CHRNA2/HTR3A/GABRG3/CHRNA1/GLRA2/GRIA4/GRIK5	21
GO:0022835	MF	GO:0022835	transmitter-gated channel activity	21/92	56/18369	4.98049292777064e-35	3.74847625616422e-34	1.4900089645408e-34	GABRB1/GABRB3/CHRNA4/GRIA1/GABRA6/CHRNB4/CHRNG/GRID2/GRIK4/GABRA3/HTR3C/GRIN2C/GRIN2B/GRIK2/CHRNA2/HTR3A/GABRG3/CHRNA1/GLRA2/GRIA4/GRIK5	21
GO:0098659	BP	GO:0098659	inorganic cation import across plasma membrane	20/93	136/18614	3.00628468811641e-24	3.10248579813613e-22	2.3638891179189e-22	KCNJ10/TRPV5/KCNJ6/SCNN1D/HCN4/SCN1A/KCNQ1/SCN10A/KCNJ8/SCN2A/KCNK9/CACNA1I/CACNA1S/HCN2/TRPM2/AQP8/CACNA1F/SCN9A/P2RX1/TRPM1	20
GO:0099587	BP	GO:0099587	inorganic ion import across plasma membrane	20/93	136/18614	3.00628468811641e-24	3.10248579813613e-22	2.3638891179189e-22	KCNJ10/TRPV5/KCNJ6/SCNN1D/HCN4/SCN1A/KCNQ1/SCN10A/KCNJ8/SCN2A/KCNK9/CACNA1I/CACNA1S/HCN2/TRPM2/AQP8/CACNA1F/SCN9A/P2RX1/TRPM1	20
GO:0001508	BP	GO:0001508	action potential	20/93	142/18614	7.43922735018724e-24	6.97934784126657e-22	5.31780175176064e-22	GJC1/P2RX3/HCN1/GLRA1/HCN4/CHRNA4/SCN1A/KCNQ1/CLCN1/SCN10A/KCNJ8/KCND2/CHRNB4/HCN2/GRIK2/KCNH6/CHRNA1/SCN9A/KCNA1/P2RX1	20
GO:0098739	BP	GO:0098739	import across plasma membrane	20/93	212/18614	2.7911258330068e-20	2.05745847118787e-18	1.56764736635795e-18	KCNJ10/TRPV5/KCNJ6/SCNN1D/HCN4/SCN1A/KCNQ1/SCN10A/KCNJ8/SCN2A/KCNK9/CACNA1I/CACNA1S/HCN2/TRPM2/AQP8/CACNA1F/SCN9A/P2RX1/TRPM1	20
GO:0098657	BP	GO:0098657	import into cell	20/93	265/18614	2.39539366132577e-18	1.54502891155512e-16	1.17720991119102e-16	KCNJ10/TRPV5/KCNJ6/SCNN1D/HCN4/SCN1A/KCNQ1/SCN10A/KCNJ8/SCN2A/KCNK9/CACNA1I/CACNA1S/HCN2/TRPM2/AQP8/CACNA1F/SCN9A/P2RX1/TRPM1	20
GO:0034705	CC	GO:0034705	potassium channel complex	20/93	89/19518	1.25754446036054e-28	2.74863289193089e-27	1.51283544103523e-27	KCNV2/KCNA10/HCN1/KCNA6/KCNJ6/KCNQ3/KCNC3/HCN4/KCNC4/KCNQ1/KCNV1/KCNJ8/KCND2/KCNA4/GRIK4/HCN2/GRIK2/KCNG4/GRIK5/KCNA1	20
GO:0005262	MF	GO:0005262	calcium channel activity	19/92	126/18369	2.85688334667325e-23	1.85697417533761e-22	7.38142108709834e-23	TRPV5/TRPM3/CATSPER4/SCN1A/PKD2L1/SCN10A/SCN2A/CACNA1I/TRPM8/CACNA1S/TRPC6/GRIN2C/GRIN2B/TRPM2/TRPC1/TRPM5/CACNA1F/SCN9A/TRPM1	19
GO:0015085	MF	GO:0015085	calcium ion transmembrane transporter activity	19/92	142/18369	3.08429080709368e-22	1.91762428441042e-21	7.62250359647865e-22	TRPV5/TRPM3/CATSPER4/SCN1A/PKD2L1/SCN10A/SCN2A/CACNA1I/TRPM8/CACNA1S/TRPC6/GRIN2C/GRIN2B/TRPM2/TRPC1/TRPM5/CACNA1F/SCN9A/TRPM1	19
GO:0051260	BP	GO:0051260	protein homooligomerization	18/93	191/18614	2.62845464493328e-18	1.59562658445362e-16	1.21576199366264e-16	AQP10/KCNV2/KCNA10/P2RX3/HCN1/TRPV5/KCNA6/AQP5/KCNC3/KCNC4/PKD2L1/KCNV1/KCND2/KCNA4/TRPM2/KCNG4/MIP/KCNA1	18
GO:0097553	BP	GO:0097553	calcium ion transmembrane import into cytosol	17/93	201/18614	1.56540900647316e-16	8.97501163711278e-15	6.83836565985644e-15	P2RX3/TRPV5/SCN1A/P2RX5/SCN10A/SCN2A/CACNA1I/P2RX7/CACNA1S/GRIN2C/GRIN2B/TRPM2/TRPC1/CACNA1F/SCN9A/P2RX1/TRPM1	17
GO:0006814	BP	GO:0006814	sodium ion transport	17/93	254/18614	7.89279388301894e-15	3.87874442251217e-13	2.95534688251386e-13	NALCN/HCN1/SCNN1D/HCN4/CATSPER4/SCN1A/PKD2L1/KCNQ1/SCN10A/SCN2A/CACNA1I/P2RX7/CLCNKB/HCN2/TRPM2/TRPM5/SCN9A	17
GO:0008076	CC	GO:0008076	voltage-gated potassium channel complex	17/93	78/19518	3.57345550996802e-24	6.83423366281385e-23	3.76153211575581e-23	KCNV2/KCNA10/HCN1/KCNA6/KCNJ6/KCNQ3/KCNC3/HCN4/KCNC4/KCNQ1/KCNV1/KCNJ8/KCND2/KCNA4/HCN2/KCNG4/KCNA1	17
GO:0043025	CC	GO:0043025	neuronal cell body	17/93	500/19518	1.92781872863761e-10	1.59521850588179e-09	8.78001241627402e-10	P2RX3/GLRA1/KCNC3/KCNC4/CHRNA4/SCN1A/KCNQ1/GRIA1/KCND2/P2RX7/TRPM2/GRIK2/TRPM5/CACNA1F/GRIA4/GRIK5/KCNA1	17
GO:0099505	BP	GO:0099505	regulation of presynaptic membrane potential	15/93	30/18614	1.3461197203288e-27	1.73649443922415e-25	1.32309398827054e-25	GABRB1/GLRA1/SCN1A/SCN10A/GRIA1/KCNJ8/KCNA4/GRIK4/GABRA3/GABRR1/GRIN2B/GRIK2/GRIA4/GRIK5/KCNA1	15
GO:0006936	BP	GO:0006936	muscle contraction	15/93	349/18614	1.91758313179585e-10	5.99680543034338e-09	4.56916937624082e-09	GJC1/P2RX3/GLRA1/HCN4/SCN1A/KCNQ1/CLCN1/SCN10A/KCNJ8/CHRNB4/CHRNG/CACNA1S/CHRNA1/KCNA1/P2RX1	15
GO:0003012	BP	GO:0003012	muscle system process	15/93	452/18614	6.59868282890064e-09	1.66093675107938e-07	1.26552402392523e-07	GJC1/P2RX3/GLRA1/HCN4/SCN1A/KCNQ1/CLCN1/SCN10A/KCNJ8/CHRNB4/CHRNG/CACNA1S/CHRNA1/KCNA1/P2RX1	15
GO:0050804	BP	GO:0050804	modulation of chemical synaptic transmission	15/93	487/18614	1.78617691517285e-08	4.0962990587964e-07	3.12110913598624e-07	NALCN/P2RX3/KCNJ10/HCN1/GRIA1/CHRNB4/GRID2/GRIK4/GABRR1/GRIN2C/GRIN2B/GRIK2/GRIA4/GRIK5/P2RX1	15
GO:0099177	BP	GO:0099177	regulation of trans-synaptic signaling	15/93	488/18614	1.83546115093326e-08	4.11781719078939e-07	3.13750453031383e-07	NALCN/P2RX3/KCNJ10/HCN1/GRIA1/CHRNB4/GRID2/GRIK4/GABRR1/GRIN2C/GRIN2B/GRIK2/GRIA4/GRIK5/P2RX1	15
GO:0005272	MF	GO:0005272	sodium channel activity	15/92	41/18369	5.39313599669221e-25	3.67246879774755e-24	1.45979620963097e-24	NALCN/HCN1/SCNN1D/HCN4/SCN1A/PKD2L1/SCN10A/SCN2A/GRIK4/HCN2/TRPM2/GRIK2/TRPM5/GRIK5/SCN9A	15
GO:0015081	MF	GO:0015081	sodium ion transmembrane transporter activity	15/92	155/18369	1.47400255815215e-15	7.26835744192269e-15	2.88915201960858e-15	NALCN/HCN1/SCNN1D/HCN4/SCN1A/PKD2L1/SCN10A/SCN2A/GRIK4/HCN2/TRPM2/GRIK2/TRPM5/GRIK5/SCN9A	15
GO:0042734	CC	GO:0042734	presynaptic membrane	14/93	164/19518	4.16641418463244e-14	4.90354900191356e-13	2.69889177951899e-13	GABRB1/P2RX3/HCN1/KCNC3/SCN10A/KCNJ8/SCN2A/GRIK4/GABRA3/GABRR1/GRIK2/GRIK5/KCNA1/P2RX1	14
GO:0098802	CC	GO:0098802	plasma membrane signaling receptor complex	14/93	319/19518	3.39239043021592e-10	2.47159874201445e-09	1.36035706474824e-09	CHRNA4/GRIA1/CHRNB4/GRID2/GRIK4/HTR3C/GRIN2C/GRIN2B/GRIK2/CHRNA2/HTR3A/CHRNA1/GRIA4/GRIK5	14
GO:0035725	BP	GO:0035725	sodium ion transmembrane transport	13/93	181/18614	5.93845856052321e-12	2.14131102237039e-10	1.63153746808515e-10	NALCN/HCN1/SCNN1D/HCN4/PKD2L1/KCNQ1/SCN10A/SCN2A/CACNA1I/HCN2/TRPM2/TRPM5/SCN9A	13
GO:1904062	BP	GO:1904062	regulation of monoatomic cation transmembrane transport	13/93	346/18614	1.72020992773611e-08	4.03467419414469e-07	3.0741550622461e-07	P2RX3/HCN1/KCNK3/HCN4/P2RX5/KCNQ1/P2RX7/HCN2/GRIN2C/GRIN2B/TRPC1/KCNA1/P2RX1	13
GO:0034707	CC	GO:0034707	chloride channel complex	13/93	55/19518	3.36261520240163e-19	5.71644584408277e-18	3.14630662213018e-18	GABRB1/GABRB3/GLRA1/CLCN7/GABRR2/GABRR3/CLCN1/GABRA6/GABRA3/CLCNKB/GABRR1/GABRG3/GLRA2	13
GO:0098978	CC	GO:0098978	glutamatergic synapse	13/93	410/19518	7.27146907585131e-08	4.450139074421e-07	2.44933695186571e-07	HCN1/SCN10A/GRIA1/KCNJ8/SCN2A/KCND2/GRID2/GABRR1/GRIN2C/GRIK2/GRIK5/KCNA1/P2RX1	13
GO:1904315	MF	GO:1904315	transmitter-gated monoatomic ion channel activity involved in regulation of postsynaptic membrane potential	13/92	35/18369	6.96264285919885e-22	4.14857470360598e-21	1.64904699296815e-21	CHRNA4/GRIA1/CHRNB4/CHRNG/GRID2/GRIK4/GRIN2C/GRIN2B/GRIK2/CHRNA2/CHRNA1/GRIA4/GRIK5	13
GO:0099529	MF	GO:0099529	neurotransmitter receptor activity involved in regulation of postsynaptic membrane potential	13/92	37/18369	1.66670506599277e-21	9.53355297747866e-21	3.78956099215199e-21	CHRNA4/GRIA1/CHRNB4/CHRNG/GRID2/GRIK4/GRIN2C/GRIN2B/GRIK2/CHRNA2/CHRNA1/GRIA4/GRIK5	13
GO:0098960	MF	GO:0098960	postsynaptic neurotransmitter receptor activity	13/92	52/18369	2.79756623698152e-19	1.42875704245842e-18	5.67926980439858e-19	CHRNA4/GRIA1/CHRNB4/CHRNG/GRID2/GRIK4/GRIN2C/GRIN2B/GRIK2/CHRNA2/CHRNA1/GRIA4/GRIK5	13
GO:0099634	CC	GO:0099634	postsynaptic specialization membrane	12/93	129/19518	1.09267138231726e-12	1.19413372496101e-11	6.57245944250986e-12	GABRB1/GRIA1/KCND2/GRID2/GRIK4/GABRA3/GRIN2C/GRIN2B/GRIK2/CHRNA1/GRIA4/GRIK5	12
GO:0099572	CC	GO:0099572	postsynaptic specialization	12/93	364/19518	1.58519024585794e-07	9.3282349083179e-07	5.13421941978281e-07	GABRB1/GRIA1/KCND2/GRID2/GRIK4/GABRA3/GRIN2C/GRIN2B/GRIK2/CHRNA1/GRIA4/GRIK5	12
GO:0005231	MF	GO:0005231	excitatory extracellular ligand-gated monoatomic ion channel activity	12/92	31/18369	1.54487315608936e-20	8.4968023584915e-20	3.37745548294841e-20	P2RX3/GLRA1/CHRNA4/P2RX5/CHRNB4/CHRNG/P2RX7/GRIK2/CHRNA2/CHRNA1/GLRA2/P2RX1	12
GO:0098703	BP	GO:0098703	calcium ion import across plasma membrane	11/93	54/18614	2.11174367008479e-15	1.14701024606711e-13	8.73945995320409e-14	TRPV5/SCN1A/SCN10A/SCN2A/CACNA1I/CACNA1S/TRPM2/CACNA1F/SCN9A/P2RX1/TRPM1	11
GO:0019226	BP	GO:0019226	transmission of nerve impulse	11/93	65/18614	1.88851687554562e-14	8.85886097983219e-13	6.74986653604105e-13	P2RX3/HCN1/GLRA1/SCN1A/CLCN1/KCND2/CHRNB4/GRIK2/CHRNA1/KCNA1/P2RX1	11
GO:0051262	BP	GO:0051262	protein tetramerization	11/93	90/18614	7.9320956436684e-13	3.37499766052391e-11	2.57152514525843e-11	AQP10/HCN1/TRPV5/TRPM3/AQP5/KCNC3/PKD2L1/GRIN2B/TRPM2/MIP/TRPM1	11
GO:0014074	BP	GO:0014074	response to purine-containing compound	11/93	143/18614	1.3277425131159e-10	4.42009765656649e-09	3.36782226586615e-09	P2RX3/HCN1/HCN4/P2RX5/KCNQ1/P2RX7/CACNA1S/HCN2/TRPM2/AQP8/P2RX1	11
GO:0006820	BP	GO:0006820	monoatomic anion transport	11/93	147/18614	1.78909422996731e-10	5.76982889164457e-09	4.39622825587361e-09	GABRB1/GABRB3/GLRA1/CLCN7/KCNQ1/CLCN1/GABRA6/GABRA3/CLCNKB/GABRG3/GLRA2	11
GO:0015698	BP	GO:0015698	inorganic anion transport	11/93	179/18614	1.4704919523833e-09	3.99354656541991e-08	3.04281852750783e-08	GABRB1/GABRB3/GLRA1/CLCN7/KCNQ1/CLCN1/GABRA6/GABRA3/CLCNKB/GABRG3/GLRA2	11
GO:1902476	BP	GO:1902476	chloride transmembrane transport	10/93	98/18614	5.76340410628368e-11	1.98261101256158e-09	1.51061854996277e-09	GABRB1/GABRB3/GLRA1/CLCN7/CLCN1/GABRA6/GABRA3/CLCNKB/GABRG3/GLRA2	10
GO:0035249	BP	GO:0035249	synaptic transmission, glutamatergic	10/93	112/18614	2.19990587841129e-10	6.67736137211896e-09	5.08770802220814e-09	HCN1/GRIA1/GRID2/GRIK4/GRIN2C/GRIN2B/GRIK2/GRIA4/GRIK5/P2RX1	10
GO:0006821	BP	GO:0006821	chloride transport	10/93	113/18614	2.4036862206194e-10	7.0874405133692e-09	5.40016122346674e-09	GABRB1/GABRB3/GLRA1/CLCN7/CLCN1/GABRA6/GABRA3/CLCNKB/GABRG3/GLRA2	10
GO:0098661	BP	GO:0098661	inorganic anion transmembrane transport	10/93	122/18614	5.14368769773327e-10	1.47452380668354e-08	1.123489681347e-08	GABRB1/GABRB3/GLRA1/CLCN7/CLCN1/GABRA6/GABRA3/CLCNKB/GABRG3/GLRA2	10
GO:0098656	BP	GO:0098656	monoatomic anion transmembrane transport	10/93	125/18614	6.53923421196755e-10	1.8239161369596e-08	1.38970354376665e-08	GABRB1/GABRB3/GLRA1/CLCN7/CLCN1/GABRA6/GABRA3/CLCNKB/GABRG3/GLRA2	10
GO:0007601	BP	GO:0007601	visual perception	10/93	220/18614	1.48916119724433e-07	2.89964972746443e-06	2.20934143861274e-06	GJC1/GJA10/KCNJ10/GLRA1/GABRR2/CNGB1/GJA3/CACNA1F/MIP/TRPM1	10
GO:0050953	BP	GO:0050953	sensory perception of light stimulus	10/93	224/18614	1.76095882109571e-07	3.36538796920513e-06	2.5642031956306e-06	GJC1/GJA10/KCNJ10/GLRA1/GABRR2/CNGB1/GJA3/CACNA1F/MIP/TRPM1	10
GO:0060047	BP	GO:0060047	heart contraction	10/93	247/18614	4.34389588499767e-07	7.86473781283788e-06	5.99241038983058e-06	GJC1/HCN1/HCN4/SCN1A/KCNQ1/SCN10A/KCNJ8/HCN2/TRPC1/KCNH6	10
GO:0003015	BP	GO:0003015	heart process	10/93	259/18614	6.70540374157912e-07	1.15332944355161e-05	8.78760806133264e-06	GJC1/HCN1/HCN4/SCN1A/KCNQ1/SCN10A/KCNJ8/HCN2/TRPC1/KCNH6	10
GO:1902074	BP	GO:1902074	response to salt	10/93	383/18614	2.14158265907724e-05	0.000279761177742749	0.000213159526493098	P2RX3/KCNJ10/SCNN1D/PKD2L1/P2RX5/P2RX7/TRPM2/TRPC1/CHRNA2/P2RX1	10
GO:0098878	CC	GO:0098878	neurotransmitter receptor complex	10/93	46/19518	1.29854757551201e-14	1.96682851207269e-13	1.08253375277479e-13	GRIA1/GRID2/GRIK4/HTR3C/GRIN2C/GRIN2B/GRIK2/HTR3A/GRIA4/GRIK5	10
GO:0098984	CC	GO:0098984	neuron to neuron synapse	10/93	382/19518	1.39833814708113e-05	6.29252166186508e-05	3.46337621568081e-05	P2RX3/GRIA1/KCND2/GRID2/GRIK4/GRIN2C/GRIN2B/GRIK2/GRIA4/GRIK5	10
GO:0099507	MF	GO:0099507	ligand-gated monoatomic ion channel activity involved in regulation of presynaptic membrane potential	10/92	17/18369	1.13358123878168e-19	6.00378211651037e-19	2.38648681848774e-19	GABRB1/GLRA1/GRIA1/GRIK4/GABRA3/GABRR1/GRIN2B/GRIK2/GRIA4/GRIK5	10
GO:0005254	MF	GO:0005254	chloride channel activity	10/92	74/18369	3.32027442489642e-12	1.18699810690047e-11	4.71828470906334e-12	GABRB1/GABRB3/GLRA1/CLCN7/CLCN1/GABRA6/GABRA3/CLCNKB/GABRG3/GLRA2	10
GO:0005253	MF	GO:0005253	monoatomic anion channel activity	10/92	87/18369	1.75367648634151e-11	6.11648140358136e-11	2.43128447400363e-11	GABRB1/GABRB3/GLRA1/CLCN7/CLCN1/GABRA6/GABRA3/CLCNKB/GABRG3/GLRA2	10
GO:0015108	MF	GO:0015108	chloride transmembrane transporter activity	10/92	107/18369	1.41968293730456e-10	4.72127116359423e-10	1.8766922549436e-10	GABRB1/GABRB3/GLRA1/CLCN7/CLCN1/GABRA6/GABRA3/CLCNKB/GABRG3/GLRA2	10
GO:0008509	MF	GO:0008509	monoatomic anion transmembrane transporter activity	10/92	123/18369	5.67872028302761e-10	1.80457111216211e-09	7.17312035750856e-10	GABRB1/GABRB3/GLRA1/CLCN7/CLCN1/GABRA6/GABRA3/CLCNKB/GABRG3/GLRA2	10
GO:0015103	MF	GO:0015103	inorganic anion transmembrane transporter activity	10/92	141/18369	2.17193018213895e-09	6.33849012338511e-09	2.51953232729331e-09	GABRB1/GABRB3/GLRA1/CLCN7/CLCN1/GABRA6/GABRA3/CLCNKB/GABRG3/GLRA2	10
GO:0019228	BP	GO:0019228	neuronal action potential	9/93	27/18614	5.67797742343631e-15	2.92983635049314e-13	2.23234165016154e-13	P2RX3/HCN1/GLRA1/KCND2/CHRNB4/GRIK2/CHRNA1/KCNA1/P2RX1	9
GO:0007215	BP	GO:0007215	glutamate receptor signaling pathway	9/93	52/18614	4.02565147294864e-12	1.53869345188259e-10	1.17238270966574e-10	GRIA1/GRID2/GRIK4/GRIN2C/GRIN2B/GRIK2/GRIA4/GRIK5/TRPM1	9
GO:0046683	BP	GO:0046683	response to organophosphorus	9/93	129/18614	1.63855461768935e-08	4.02616277489383e-07	3.06766992334322e-07	P2RX3/HCN1/HCN4/P2RX5/KCNQ1/P2RX7/HCN2/AQP8/P2RX1	9
GO:0009581	BP	GO:0009581	detection of external stimulus	9/93	139/18614	3.14556154441355e-08	6.76295732048913e-07	5.15292647736167e-07	GJA10/SCN1A/PKD2L1/CNGB1/KCNQ1/GRIK2/CACNA1F/SCN9A/KCNA1	9
GO:0009582	BP	GO:0009582	detection of abiotic stimulus	9/93	142/18614	3.78728528961555e-08	7.97648656914948e-07	6.07755555605331e-07	GJA10/SCN1A/PKD2L1/CNGB1/KCNQ1/GRIK2/CACNA1F/SCN9A/KCNA1	9
GO:0034767	BP	GO:0034767	positive regulation of monoatomic ion transmembrane transport	9/93	175/18614	2.2814986874171e-07	4.28092117348082e-06	3.2617789846901e-06	P2RX3/KCNK3/P2RX5/KCNQ1/P2RX7/TRPC6/TRPC1/KCNA1/P2RX1	9
GO:0043270	BP	GO:0043270	positive regulation of monoatomic ion transport	9/93	231/18614	2.32579010277096e-06	3.75033654071817e-05	2.85750856376629e-05	P2RX3/KCNK3/P2RX5/KCNQ1/P2RX7/TRPC6/TRPC1/KCNA1/P2RX1	9
GO:0034764	BP	GO:0034764	positive regulation of transmembrane transport	9/93	235/18614	2.67777993775769e-06	4.25149060887067e-05	3.2393548396842e-05	P2RX3/KCNK3/P2RX5/KCNQ1/P2RX7/TRPC6/TRPC1/KCNA1/P2RX1	9
GO:1903522	BP	GO:1903522	regulation of blood circulation	9/93	261/18614	6.29066015442957e-06	9.40863953532075e-05	7.16876145745064e-05	GJC1/HCN1/HCN4/KCNQ1/SCN10A/HCN2/TRPC1/KCNH6/P2RX1	9
GO:0055074	BP	GO:0055074	calcium ion homeostasis	9/93	327/18614	3.76178155675564e-05	0.000451413786810677	0.000343947469142774	TRPV5/GRIA1/P2RX7/TRPM8/TRPC6/TRPM2/GRIK2/TRPC1/P2RX1	9
GO:0010959	BP	GO:0010959	regulation of metal ion transport	9/93	423/18614	0.000264678821970597	0.00239603986204962	0.00182562400749802	P2RX3/KCNK3/P2RX5/KCNQ1/P2RX7/TRPC6/TRPC1/KCNA1/P2RX1	9
GO:0034704	CC	GO:0034704	calcium channel complex	9/93	79/19518	1.33399623123905e-10	1.20059660811515e-09	6.60803086681885e-10	CATSPER4/SCN1A/PKD2L1/SCN10A/SCN2A/CACNA1I/CACNA1S/CACNA1F/SCN9A	9
GO:0014069	CC	GO:0014069	postsynaptic density	9/93	339/19518	3.45509169286682e-05	0.000142872710542871	7.86365107907099e-05	GRIA1/KCND2/GRID2/GRIK4/GRIN2C/GRIN2B/GRIK2/GRIA4/GRIK5	9
GO:0031253	CC	GO:0031253	cell projection membrane	9/93	349/19518	4.33073189207129e-05	0.000169897943458181	9.35110799907431e-05	KCNC3/KCNC4/PKD2L1/CNGB1/GRIA1/GABRA6/GABRA3/AQP8/GABRG3	9
GO:0032279	CC	GO:0032279	asymmetric synapse	9/93	353/19518	4.73011356712128e-05	0.000176513994090136	9.71525251270096e-05	GRIA1/KCND2/GRID2/GRIK4/GRIN2C/GRIN2B/GRIK2/GRIA4/GRIK5	9
GO:0035235	BP	GO:0035235	ionotropic glutamate receptor signaling pathway	8/93	26/18614	4.14314139209428e-13	1.85900952897448e-11	1.4164423889677e-11	GRIA1/GRID2/GRIK4/GRIN2C/GRIN2B/GRIK2/GRIA4/GRIK5	8
GO:0007214	BP	GO:0007214	gamma-aminobutyric acid signaling pathway	8/93	28/18614	8.17586642568777e-13	3.37499766052391e-11	2.57152514525843e-11	GABRB1/GABRB3/GABRR2/GABRR3/GABRA6/GABRA3/GABRR1/GABRG3	8
GO:1990806	BP	GO:1990806	ligand-gated ion channel signaling pathway	8/93	35/18614	6.01724996596331e-12	2.14131102237039e-10	1.63153746808515e-10	GRIA1/GRID2/GRIK4/GRIN2C/GRIN2B/GRIK2/GRIA4/GRIK5	8
GO:0086001	BP	GO:0086001	cardiac muscle cell action potential	8/93	79/18614	5.57674222288994e-09	1.43879949350561e-07	1.09627011592073e-07	GJC1/HCN1/HCN4/SCN1A/KCNQ1/SCN10A/KCNJ8/HCN2	8
GO:0061337	BP	GO:0061337	cardiac conduction	8/93	101/18614	3.95020057547032e-08	8.15321398777074e-07	6.2122101681607e-07	GJC1/HCN1/HCN4/KCNQ1/SCN10A/HCN2/TRPC1/KCNH6	8
GO:0019233	BP	GO:0019233	sensory perception of pain	8/93	103/18614	4.60969563719164e-08	9.32785470114072e-07	7.10720875331714e-07	P2RX3/CHRNA4/SCN1A/SCN10A/KCND2/P2RX7/SCN9A/KCNA1	8
GO:1904064	BP	GO:1904064	positive regulation of cation transmembrane transport	8/93	152/18614	9.30827706306582e-07	1.57477736542359e-05	1.19987626680072e-05	P2RX3/KCNK3/P2RX5/KCNQ1/P2RX7/TRPC1/KCNA1/P2RX1	8
GO:0006941	BP	GO:0006941	striated muscle contraction	8/93	182/18614	3.59192103110882e-06	5.53263060314074e-05	4.21549883776636e-05	GJC1/HCN4/SCN1A/KCNQ1/SCN10A/KCNJ8/CACNA1S/CHRNA1	8
GO:0019722	BP	GO:0019722	calcium-mediated signaling	8/93	187/18614	4.39035039510609e-06	6.66300236433747e-05	5.07676740734403e-05	P2RX3/P2RX5/P2RX7/TRPM8/GRIN2C/GRIN2B/TRPM2/TRPM5	8
GO:0008016	BP	GO:0008016	regulation of heart contraction	8/93	213/18614	1.14040691133533e-05	0.000159040531418657	0.000121178373082147	GJC1/HCN1/HCN4/KCNQ1/SCN10A/HCN2/TRPC1/KCNH6	8
GO:0019932	BP	GO:0019932	second-messenger-mediated signaling	8/93	292/18614	0.000107034767037119	0.00110459879582307	0.000841631273439239	P2RX3/P2RX5/P2RX7/TRPM8/GRIN2C/GRIN2B/TRPM2/TRPM5	8
GO:0006874	BP	GO:0006874	intracellular calcium ion homeostasis	8/93	303/18614	0.000138087388383101	0.00137025177703231	0.0010440412866617	GRIA1/P2RX7/TRPM8/TRPC6/TRPM2/GRIK2/TRPC1/P2RX1	8
GO:0010038	BP	GO:0010038	response to metal ion	8/93	367/18614	0.000501565252064373	0.00401252201651499	0.00305727656705089	KCNJ10/GLRA1/KCNK3/P2RX7/TRPM2/TRPC1/GLRA2/KCNA1	8
GO:1902711	CC	GO:1902711	GABA-A receptor complex	8/93	19/19518	1.41405971456206e-14	1.96682851207269e-13	1.08253375277479e-13	GABRB1/GABRB3/GABRR2/GABRR3/GABRA6/GABRA3/GABRR1/GABRG3	8
GO:1902710	CC	GO:1902710	GABA receptor complex	8/93	21/19518	3.77765478449691e-14	4.81650985023356e-13	2.65098581368204e-13	GABRB1/GABRB3/GABRR2/GABRR3/GABRA6/GABRA3/GABRR1/GABRG3	8
GO:0005921	CC	GO:0005921	gap junction	8/93	32/19518	1.87106624313172e-12	1.90848756799435e-11	1.05042315403886e-11	GJC1/GJA10/PANX3/GJA3/PANX2/GJB7/GJC3/MIP	8
GO:0008328	CC	GO:0008328	ionotropic glutamate receptor complex	8/93	41/19518	1.64135058039384e-11	1.56954149250161e-10	8.63868726523072e-11	GRIA1/GRID2/GRIK4/GRIN2C/GRIN2B/GRIK2/GRIA4/GRIK5	8
GO:0005891	CC	GO:0005891	voltage-gated calcium channel complex	8/93	55/19518	1.98099030142183e-10	1.59521850588179e-09	8.78001241627402e-10	CATSPER4/SCN1A/SCN10A/SCN2A/CACNA1I/CACNA1S/CACNA1F/SCN9A	8
GO:0098839	CC	GO:0098839	postsynaptic density membrane	8/93	102/19518	2.97329907918834e-08	2.06779435961734e-07	1.1381049106941e-07	GRIA1/GRID2/GRIK4/GRIN2C/GRIN2B/GRIK2/GRIA4/GRIK5	8
GO:0004890	MF	GO:0004890	GABA-A receptor activity	8/92	19/18369	2.09561220984597e-14	8.81389841199922e-14	3.50350028890657e-14	GABRB1/GABRB3/GABRR2/GABRR3/GABRA6/GABRA3/GABRR1/GABRG3	8
GO:0004970	MF	GO:0004970	ionotropic glutamate receptor activity	8/92	19/18369	2.09561220984597e-14	8.81389841199922e-14	3.50350028890657e-14	GRIA1/GRID2/GRIK4/GRIN2C/GRIN2B/GRIK2/GRIA4/GRIK5	8
GO:0005248	MF	GO:0005248	voltage-gated sodium channel activity	8/92	19/18369	2.09561220984597e-14	8.81389841199922e-14	3.50350028890657e-14	NALCN/HCN1/HCN4/SCN1A/SCN10A/SCN2A/HCN2/SCN9A	8
GO:0022840	MF	GO:0022840	leak channel activity	8/92	19/18369	2.09561220984597e-14	8.81389841199922e-14	3.50350028890657e-14	NALCN/KCNK10/KCNK3/KCNK16/KCNK12/KCNK9/KCNK13/KCNK15	8
GO:0022842	MF	GO:0022842	narrow pore channel activity	8/92	19/18369	2.09561220984597e-14	8.81389841199922e-14	3.50350028890657e-14	NALCN/KCNK10/KCNK3/KCNK16/KCNK12/KCNK9/KCNK13/KCNK15	8
GO:0016917	MF	GO:0016917	GABA receptor activity	8/92	22/18369	8.75833004949612e-14	3.5784034202227e-13	1.42240548172268e-13	GABRB1/GABRB3/GABRR2/GABRR3/GABRA6/GABRA3/GABRR1/GABRG3	8
GO:0008066	MF	GO:0008066	glutamate receptor activity	8/92	27/18369	5.95803539944766e-13	2.36666406144726e-12	9.40742431491735e-13	GRIA1/GRID2/GRIK4/GRIN2C/GRIN2B/GRIK2/GRIA4/GRIK5	8
GO:0005251	MF	GO:0005251	delayed rectifier potassium channel activity	8/92	29/18369	1.14253783206791e-12	4.29955026278186e-12	1.70905936098801e-12	KCNA10/KCNA6/KCNC3/KCNC4/KCNQ1/KCNA4/KCNG4/KCNA1	8
GO:0005245	MF	GO:0005245	voltage-gated calcium channel activity	8/92	52/18369	1.82400164420501e-10	5.92800534366629e-10	2.35636576045623e-10	CATSPER4/SCN1A/SCN10A/SCN2A/CACNA1I/CACNA1S/CACNA1F/SCN9A	8
GO:0030322	BP	GO:0030322	stabilization of membrane potential	7/93	17/18614	1.15301696675217e-12	4.57659042187786e-11	3.48705940957034e-11	KCNK10/KCNK3/KCNK16/KCNK12/KCNK9/KCNK13/KCNK15	7
GO:1990573	BP	GO:1990573	potassium ion import across plasma membrane	7/93	47/18614	3.30200401383108e-09	8.73761062121455e-08	6.657481776874e-08	KCNJ10/KCNJ6/HCN4/KCNQ1/KCNJ8/KCNK9/HCN2	7
GO:0051289	BP	GO:0051289	protein homotetramerization	7/93	59/18614	1.70619456481325e-08	4.03467419414469e-07	3.0741550622461e-07	AQP10/HCN1/TRPV5/AQP5/PKD2L1/TRPM2/MIP	7
GO:0051899	BP	GO:0051899	membrane depolarization	7/93	75/18614	9.30420529541493e-08	1.84652689709004e-06	1.4069314485172e-06	HCN1/HCN4/CHRNA4/CNGB1/SCN10A/P2RX7/HCN2	7
GO:0006937	BP	GO:0006937	regulation of muscle contraction	7/93	173/18614	2.56681416360238e-05	0.000319666199984781	0.000243564515900277	HCN4/KCNQ1/SCN10A/CHRNB4/CACNA1S/KCNA1/P2RX1	7
GO:0048167	BP	GO:0048167	regulation of synaptic plasticity	7/93	209/18614	8.51709568509025e-05	0.000945122876022918	0.000720121163187597	P2RX3/KCNJ10/GRIA1/GRID2/GRIN2C/GRIN2B/GRIK2	7
GO:0009612	BP	GO:0009612	response to mechanical stimulus	7/93	215/18614	0.000101641256585153	0.00109196477567757	0.000832004985139884	P2RX3/SCN1A/PKD2L1/KCNQ1/P2RX7/SCN9A/KCNA1	7
GO:0090257	BP	GO:0090257	regulation of muscle system process	7/93	254/18614	0.00028327368279375	0.00252015897106163	0.00192019456485418	HCN4/KCNQ1/SCN10A/CHRNB4/CACNA1S/KCNA1/P2RX1	7
GO:0032412	BP	GO:0032412	regulation of monoatomic ion transmembrane transporter activity	7/93	278/18614	0.000487379475731582	0.00398478890888344	0.00303614577206847	HCN1/KCNK3/HCN4/KCNQ1/TRPC6/HCN2/KCNA1	7
GO:0022898	BP	GO:0022898	regulation of transmembrane transporter activity	7/93	289/18614	0.000613596569555933	0.00479720954380093	0.0036551565985509	HCN1/KCNK3/HCN4/KCNQ1/TRPC6/HCN2/KCNA1	7
GO:0032409	BP	GO:0032409	regulation of transporter activity	7/93	324/18614	0.00119606689853411	0.00851269682267035	0.00648611232816682	HCN1/KCNK3/HCN4/KCNQ1/TRPC6/HCN2/KCNA1	7
GO:0043204	CC	GO:0043204	perikaryon	7/93	156/19518	9.70073840172908e-06	4.63816554832672e-05	2.55282589519186e-05	GLRA1/KCNC3/KCND2/TRPM2/CACNA1F/GRIK5/KCNA1	7
GO:0043197	CC	GO:0043197	dendritic spine	7/93	175/19518	2.04613276099665e-05	8.94452321235678e-05	4.92302619187164e-05	P2RX3/KCNC3/GRIA1/KCND2/KCNA4/GRID2/GRIA4	7
GO:0044309	CC	GO:0044309	neuron spine	7/93	178/19518	2.28292064894082e-05	9.70241275799848e-05	5.34016526068028e-05	P2RX3/KCNC3/GRIA1/KCND2/KCNA4/GRID2/GRIA4	7
GO:0016324	CC	GO:0016324	apical plasma membrane	7/93	381/19518	0.00229810931662015	0.00651130973042375	0.00358379620525559	AQP10/TRPV5/AQP5/KCNQ1/AQP8/MIP/KCNA1	7
GO:0045177	CC	GO:0045177	apical part of cell	7/93	446/19518	0.00544400728214047	0.0143609157615085	0.00790418480165586	AQP10/TRPV5/AQP5/KCNQ1/AQP8/MIP/KCNA1	7
GO:0022841	MF	GO:0022841	potassium ion leak channel activity	7/92	16/18369	6.90912503805741e-13	2.67028346065462e-12	1.06143030456643e-12	KCNK10/KCNK3/KCNK16/KCNK12/KCNK9/KCNK13/KCNK15	7
GO:0099095	MF	GO:0099095	ligand-gated monoatomic anion channel activity	7/92	19/18369	3.00633237000353e-12	1.10232186900129e-11	4.38169900081486e-12	GABRB1/GABRB3/GLRA1/GABRA6/GABRA3/GABRG3/GLRA2	7
GO:0008331	MF	GO:0008331	high voltage-gated calcium channel activity	7/92	24/18369	2.02350909090452e-11	6.88956666665112e-11	2.73858373205123e-11	SCN1A/SCN10A/SCN2A/CACNA1I/CACNA1S/CACNA1F/SCN9A	7
GO:0086019	BP	GO:0086019	cell-cell signaling involved in cardiac conduction	6/93	37/18614	2.71075629672486e-08	5.95212871961715e-07	4.53512867559568e-07	GJC1/HCN1/HCN4/KCNQ1/SCN10A/HCN2	6
GO:0086065	BP	GO:0086065	cell communication involved in cardiac conduction	6/93	61/18614	5.88049309048442e-07	1.0285879439627e-05	7.83716028294712e-06	GJC1/HCN1/HCN4/KCNQ1/SCN10A/HCN2	6
GO:0002027	BP	GO:0002027	regulation of heart rate	6/93	106/18614	1.50883743142524e-05	0.00020488424068827	0.000156108249484024	HCN1/HCN4/KCNQ1/SCN10A/HCN2/KCNH6	6
GO:0051928	BP	GO:0051928	positive regulation of calcium ion transport	6/93	129/18614	4.58917833463249e-05	0.000538185459243265	0.000410061748321826	P2RX3/P2RX5/P2RX7/TRPC6/TRPC1/P2RX1	6
GO:0060048	BP	GO:0060048	cardiac muscle contraction	6/93	138/18614	6.68723561182558e-05	0.000775418781056629	0.000590817859495412	GJC1/HCN4/SCN1A/KCNQ1/SCN10A/KCNJ8	6
GO:0031644	BP	GO:0031644	regulation of nervous system process	6/93	150/18614	0.000106069519439983	0.00110459879582307	0.000841631273439239	P2RX3/GLRA1/CHRNB4/GRIN2C/GRIN2B/CHRNA2	6
GO:2001257	BP	GO:2001257	regulation of cation channel activity	6/93	154/18614	0.000122571981380003	0.00125241866122934	0.000954260240655156	HCN1/KCNK3/HCN4/KCNQ1/HCN2/KCNA1	6
GO:0050905	BP	GO:0050905	neuromuscular process	6/93	157/18614	0.000136236806443453	0.00136501343931693	0.00104005001955298	GLRA1/SCN1A/GRID2/GRIN2C/CHRNA1/KCNA1	6
GO:0050954	BP	GO:0050954	sensory perception of mechanical stimulus	6/93	179/18614	0.00027741683208318	0.00248951452791167	0.00189684552463282	KCNQ4/SCN1A/KCNQ1/GJC3/SCN9A/KCNA1	6
GO:0071248	BP	GO:0071248	cellular response to metal ion	6/93	200/18614	0.000500919372069423	0.00401252201651499	0.00305727656705089	KCNJ10/GLRA1/KCNK3/TRPM2/GLRA2/KCNA1	6
GO:0071241	BP	GO:0071241	cellular response to inorganic substance	6/93	231/18614	0.00106209172390163	0.00781343900452832	0.0059533240885176	KCNJ10/GLRA1/KCNK3/TRPM2/GLRA2/KCNA1	6
GO:0051924	BP	GO:0051924	regulation of calcium ion transport	6/93	266/18614	0.00217373632942524	0.0145668564413432	0.0110989818050626	P2RX3/P2RX5/P2RX7/TRPC6/TRPC1/P2RX1	6
GO:0071214	BP	GO:0071214	cellular response to abiotic stimulus	6/93	339/18614	0.00706359334987621	0.0383664649319592	0.0292327104285736	AQP10/AQP5/SCNN1D/PKD2L1/SCN2A/TRPM1	6
GO:0104004	BP	GO:0104004	cellular response to environmental stimulus	6/93	339/18614	0.00706359334987621	0.0383664649319592	0.0292327104285736	AQP10/AQP5/SCNN1D/PKD2L1/SCN2A/TRPM1	6
GO:0034706	CC	GO:0034706	sodium channel complex	6/93	19/19518	2.56458428382105e-10	1.9619069771231e-09	1.07982496160886e-09	SCNN1D/SCN10A/SCN2A/GRIK4/GRIK2/GRIK5	6
GO:0032590	CC	GO:0032590	dendrite membrane	6/93	41/19518	3.90700938838785e-08	2.59901059314496e-07	1.4304839865951e-07	KCNC3/KCNC4/GRIA1/GABRA6/GABRA3/GABRG3	6
GO:0032589	CC	GO:0032589	neuron projection membrane	6/93	60/19518	4.04538224289339e-07	2.29238327097292e-06	1.26171765860223e-06	KCNC3/KCNC4/GRIA1/GABRA6/GABRA3/GABRG3	6
GO:0098982	CC	GO:0098982	GABA-ergic synapse	6/93	84/19518	2.99683503832403e-06	1.47908309955992e-05	8.14080825351178e-06	GABRB1/GABRR2/KCND2/GABRA3/GABRR1/GABRG3	6
GO:0031256	CC	GO:0031256	leading edge membrane	6/93	180/19518	0.000222083474704716	0.000790203991391199	0.000434924797463336	KCNC3/KCNC4/GRIA1/GABRA6/GABRA3/GABRG3	6
GO:0009925	CC	GO:0009925	basal plasma membrane	6/93	266/19518	0.00171557363476545	0.00534123647177592	0.00293979303572118	AQP10/KCNJ10/KCNQ4/AQP5/KCNQ1/AQP8	6
GO:0045178	CC	GO:0045178	basal part of cell	6/93	285/19518	0.00242457143620858	0.00674471690436204	0.00371226248606098	AQP10/KCNJ10/KCNQ4/AQP5/KCNQ1/AQP8	6
GO:0031252	CC	GO:0031252	cell leading edge	6/93	422/19518	0.0155241415506994	0.0389376009386394	0.0214310841079543	KCNC3/KCNC4/GRIA1/GABRA6/GABRA3/GABRG3	6
GO:0005217	MF	GO:0005217	intracellular ligand-gated monoatomic ion channel activity	6/92	29/18369	5.79235309851632e-09	1.6241303786036e-08	6.45587342249498e-09	KCNA10/HCN1/HCN4/CNGB1/HCN2/TRPM2	6
GO:0007271	BP	GO:0007271	synaptic transmission, cholinergic	5/93	29/18614	3.01653066317553e-07	5.55903507928061e-06	4.23561730336865e-06	NALCN/CHRNA4/CHRNB4/CHRNG/CHRNA1	5
GO:0086091	BP	GO:0086091	regulation of heart rate by cardiac conduction	5/93	42/18614	2.05290680473899e-06	3.36285686109624e-05	2.5622746585464e-05	HCN1/HCN4/KCNQ1/HCN2/KCNH6	5
GO:0003254	BP	GO:0003254	regulation of membrane depolarization	5/93	46/18614	3.25632434182464e-06	5.09170715267125e-05	3.87954431155184e-05	HCN1/HCN4/SCN10A/P2RX7/HCN2	5
GO:0050982	BP	GO:0050982	detection of mechanical stimulus	5/93	53/18614	6.63185996276423e-06	9.77725640224669e-05	7.44962314614267e-05	SCN1A/PKD2L1/KCNQ1/SCN9A/KCNA1	5
GO:0071320	BP	GO:0071320	cellular response to cAMP	5/93	54/18614	7.27987545647156e-06	0.000104344881542759	7.95039030114658e-05	HCN1/HCN4/KCNQ1/HCN2/AQP8	5
GO:0051932	BP	GO:0051932	synaptic transmission, GABAergic	5/93	57/18614	9.52531866600527e-06	0.000134659299497499	0.000102601485847238	NALCN/GABRB3/GABRA6/GABRA3/GABRG3	5
GO:0086003	BP	GO:0086003	cardiac muscle cell contraction	5/93	76/18614	3.9003619383131e-05	0.000462663623027485	0.000352519100776756	GJC1/HCN4/SCN1A/KCNQ1/KCNJ8	5
GO:0051591	BP	GO:0051591	response to cAMP	5/93	89/18614	8.32688084007474e-05	0.000934058807277949	0.000711691074088768	HCN1/HCN4/KCNQ1/HCN2/AQP8	5
GO:1904427	BP	GO:1904427	positive regulation of calcium ion transmembrane transport	5/93	93/18614	0.000102636224070469	0.00109196477567757	0.000832004985139884	P2RX3/P2RX5/P2RX7/TRPC1/P2RX1	5
GO:0070252	BP	GO:0070252	actin-mediated cell contraction	5/93	104/18614	0.000173945083610248	0.00164689290170437	0.00125482353893631	GJC1/HCN4/SCN1A/KCNQ1/KCNJ8	5
GO:0030048	BP	GO:0030048	actin filament-based movement	5/93	131/18614	0.000506430310385336	0.00402027754090513	0.00306318576403114	GJC1/HCN4/SCN1A/KCNQ1/KCNJ8	5
GO:0030534	BP	GO:0030534	adult behavior	5/93	143/18614	0.000753897768127856	0.00572075365226432	0.00435883616711694	KCNJ10/GLRA1/CHRNA4/SCN1A/CHRNB4	5
GO:0009266	BP	GO:0009266	response to temperature stimulus	5/93	183/18614	0.00224846152913018	0.014874437808092	0.0113333384767898	P2RX3/TRPM8/TRPM2/GRIK2/SCN9A	5
GO:1903169	BP	GO:1903169	regulation of calcium ion transmembrane transport	5/93	186/18614	0.002412742285504	0.0157591774597477	0.0120074516140672	P2RX3/P2RX5/P2RX7/TRPC1/P2RX1	5
GO:0007626	BP	GO:0007626	locomotory behavior	5/93	201/18614	0.00336784972734174	0.02119281047937	0.0161475208364844	KCNJ10/GLRA1/SCN1A/KCND2/CHRNB4	5
GO:0006836	BP	GO:0006836	neurotransmitter transport	5/93	202/18614	0.00343992918772994	0.0215151934650745	0.016393155363536	KCNJ10/CHRNB4/P2RX7/GRIK5/P2RX1	5
GO:1902075	BP	GO:1902075	cellular response to salt	5/93	204/18614	0.00358741168919627	0.0220369575193485	0.0167907050866517	P2RX3/KCNJ10/SCNN1D/P2RX7/TRPM2	5
GO:0001505	BP	GO:0001505	regulation of neurotransmitter levels	5/93	211/18614	0.00413949614895514	0.0244112001469811	0.0185997210422225	KCNJ10/CHRNB4/P2RX7/GRIK5/P2RX1	5
GO:0005922	CC	GO:0005922	connexin complex	5/93	21/19518	4.22068242555289e-08	2.69068504628997e-07	1.48094120194838e-07	GJC1/GJA10/GJA3/GJB7/GJC3	5
GO:0048787	CC	GO:0048787	presynaptic active zone membrane	5/93	34/19518	5.4961249472442e-07	3.00323970331558e-06	1.65296990894563e-06	GABRB1/HCN1/KCNJ8/GABRA3/P2RX1	5
GO:0044304	CC	GO:0044304	main axon	5/93	64/19518	1.34557735851799e-05	6.23858593494703e-05	3.43369022907301e-05	KCNQ3/SCN1A/SCN2A/KCNA4/KCNA1	5
GO:0048786	CC	GO:0048786	presynaptic active zone	5/93	82/19518	4.50117476458603e-05	0.000172169934745416	9.47615739912849e-05	GABRB1/HCN1/KCNJ8/GABRA3/P2RX1	5
GO:0042383	CC	GO:0042383	sarcolemma	5/93	136/19518	0.000485234270582968	0.00157959241274881	0.000869400708771276	SCN1A/CLCN1/KCNJ8/SCN2A/CACNA1S	5
GO:0045121	CC	GO:0045121	membrane raft	5/93	323/19518	0.019166208087727	0.0471030123980712	0.0259252906215734	P2RX3/KCNQ1/KCND2/TRPM8/P2RX1	5
GO:0098857	CC	GO:0098857	membrane microdomain	5/93	324/19518	0.0193953580462646	0.0471030123980712	0.0259252906215734	P2RX3/KCNQ1/KCND2/TRPM8/P2RX1	5
GO:0005221	MF	GO:0005221	intracellular cyclic nucleotide activated monoatomic cation channel activity	5/92	11/18369	1.27376469498038e-09	3.79475732046237e-09	1.50840555984518e-09	KCNA10/HCN1/HCN4/CNGB1/HCN2	5
GO:0043855	MF	GO:0043855	cyclic nucleotide-gated monoatomic ion channel activity	5/92	11/18369	1.27376469498038e-09	3.79475732046237e-09	1.50840555984518e-09	KCNA10/HCN1/HCN4/CNGB1/HCN2	5
GO:0099508	MF	GO:0099508	voltage-gated monoatomic ion channel activity involved in regulation of presynaptic membrane potential	5/92	11/18369	1.27376469498038e-09	3.79475732046237e-09	1.50840555984518e-09	SCN1A/SCN10A/KCNJ8/KCNA4/KCNA1	5
GO:0022851	MF	GO:0022851	GABA-gated chloride ion channel activity	5/92	13/18369	3.52039463738603e-09	1.0068328662924e-08	4.00213285092306e-09	GABRB1/GABRB3/GABRA6/GABRA3/GABRG3	5
GO:0005237	MF	GO:0005237	inhibitory extracellular ligand-gated monoatomic ion channel activity	5/92	15/18369	8.14956019988404e-09	2.24112905496811e-08	8.9084261294279e-09	GLRA1/GABRA6/GABRA3/GABRG3/GLRA2	5
GO:0022848	MF	GO:0022848	acetylcholine-gated monoatomic cation-selective channel activity	5/92	17/18369	1.66607921637076e-08	4.49527033850979e-08	1.78685755082465e-08	CHRNA4/CHRNB4/CHRNG/CHRNA2/CHRNA1	5
GO:0015464	MF	GO:0015464	acetylcholine receptor activity	5/92	21/18369	5.39290562481634e-08	1.42812130434951e-07	5.67674276296457e-08	CHRNA4/CHRNB4/CHRNG/CHRNA2/CHRNA1	5
GO:0099604	MF	GO:0099604	ligand-gated calcium channel activity	5/92	26/18369	1.70920546689324e-07	4.44393421392242e-07	1.76645158300928e-07	TRPM8/GRIN2C/GRIN2B/TRPM2/TRPM5	5
GO:0005516	MF	GO:0005516	calmodulin binding	5/92	200/18369	0.00332855572744774	0.00594979336281283	0.00236502643792339	TRPV5/KCNQ3/KCNQ1/CACNA1S/MIP	5
GO:0086070	BP	GO:0086070	SA node cell to atrial cardiac muscle cell communication	4/93	14/18614	5.62511055243834e-07	1.00088173967523e-05	7.62605731882293e-06	GJC1/HCN1/HCN4/HCN2	4
GO:0060080	BP	GO:0060080	inhibitory postsynaptic potential	4/93	17/18614	1.3221662629737e-06	2.20076706998202e-05	1.67683904658973e-05	GLRA1/CHRNA4/GRIK2/CHRNA2	4
GO:0006833	BP	GO:0006833	water transport	4/93	25/18614	6.8156499673558e-06	9.9066912201566e-05	7.54824392233474e-05	AQP10/AQP5/AQP8/MIP	4
GO:0033198	BP	GO:0033198	response to ATP	4/93	32/18614	1.88632273723661e-05	0.000249575008311306	0.000190159660555432	P2RX3/P2RX5/P2RX7/P2RX1	4
GO:0035590	BP	GO:0035590	purinergic nucleotide receptor signaling pathway	4/93	32/18614	1.88632273723661e-05	0.000249575008311306	0.000190159660555432	P2RX3/P2RX5/P2RX7/P2RX1	4
GO:0042044	BP	GO:0042044	fluid transport	4/93	34/18614	2.41418903478454e-05	0.000311430385487206	0.000237289369603165	AQP10/AQP5/AQP8/MIP	4
GO:0050974	BP	GO:0050974	detection of mechanical stimulus involved in sensory perception	4/93	35/18614	2.71530586969096e-05	0.00033359472113346	0.000254177128403402	SCN1A/KCNQ1/SCN9A/KCNA1	4
GO:0009268	BP	GO:0009268	response to pH	4/93	45/18614	7.43726477877779e-05	0.000852806361299853	0.000649782080672164	AQP10/CLCN7/SCNN1D/PKD2L1	4
GO:0035094	BP	GO:0035094	response to nicotine	4/93	48/18614	9.60219298375669e-05	0.00104310138518283	0.000794774311231717	CHRNA4/KCNQ1/CHRNB4/CHRNA2	4
GO:0010043	BP	GO:0010043	response to zinc ion	4/93	49/18614	0.000104159279061329	0.00109686097950297	0.000835735568837946	GLRA1/KCNK3/P2RX7/GLRA2	4
GO:0086002	BP	GO:0086002	cardiac muscle cell action potential involved in contraction	4/93	54/18614	0.000152535533610888	0.00149920638748987	0.00114229617651462	GJC1/SCN1A/KCNQ1/KCNJ8	4
GO:0050805	BP	GO:0050805	negative regulation of synaptic transmission	4/93	55/18614	0.000163873503784021	0.00159544769721801	0.00121562569341275	HCN1/GRIA1/GRID2/GRIK2	4
GO:0048168	BP	GO:0048168	regulation of neuronal synaptic plasticity	4/93	57/18614	0.000188357721697054	0.00176713789810327	0.00134644227854257	KCNJ10/GRIN2C/GRIN2B/GRIK2	4
GO:0051480	BP	GO:0051480	regulation of cytosolic calcium ion concentration	4/93	61/18614	0.000245081038000053	0.00225824670728621	0.0017206347310718	GRIA1/TRPC6/TRPC1/P2RX1	4
GO:0098900	BP	GO:0098900	regulation of action potential	4/93	61/18614	0.000245081038000053	0.00225824670728621	0.0017206347310718	HCN1/HCN4/HCN2/SCN9A	4
GO:0051966	BP	GO:0051966	regulation of synaptic transmission, glutamatergic	4/93	80/18614	0.000690992390777065	0.00528225294282912	0.00402472760943834	HCN1/GRIN2C/GRIN2B/GRIK2	4
GO:0033555	BP	GO:0033555	multicellular organismal response to stress	4/93	90/18614	0.00107478478011405	0.00781343900452832	0.0059533240885176	P2RX3/HCN1/GRIK2/SCN9A	4
GO:0003014	BP	GO:0003014	renal system process	4/93	127/18614	0.00377914345610051	0.0230773730573711	0.0175834329598697	TRPV5/KCNQ1/CHRNB4/CLCNKB	4
GO:0007269	BP	GO:0007269	neurotransmitter secretion	4/93	141/18614	0.00547272315130788	0.0310321444623612	0.0236444429961075	CHRNB4/P2RX7/GRIK5/P2RX1	4
GO:0099643	BP	GO:0099643	signal release from synapse	4/93	141/18614	0.00547272315130788	0.0310321444623612	0.0236444429961075	CHRNB4/P2RX7/GRIK5/P2RX1	4
GO:0005892	CC	GO:0005892	acetylcholine-gated channel complex	4/93	16/19518	8.41356418718116e-07	4.43888041599558e-06	2.44314023584208e-06	CHRNA4/CHRNB4/CHRNA2/CHRNA1	4
GO:0043194	CC	GO:0043194	axon initial segment	4/93	21/19518	2.7167374289202e-06	1.3855360887493e-05	7.62592962503917e-06	KCNQ3/SCN1A/KCNA4/KCNA1	4
GO:0098686	CC	GO:0098686	hippocampal mossy fiber to CA3 synapse	4/93	41/19518	4.27374719979685e-05	0.000169897943458181	9.35110799907431e-05	P2RX3/GRIK4/GRIK2/GRIK5	4
GO:0005637	CC	GO:0005637	nuclear inner membrane	4/93	64/19518	0.000246629975503657	0.000857599687546807	0.000472019091873028	P2RX3/P2RX5/P2RX7/P2RX1	4
GO:0043679	CC	GO:0043679	axon terminus	4/93	114/19518	0.00216140489781011	0.0063595182570182	0.00350025084665604	P2RX3/KCNA6/GRIK5/KCNA1	4
GO:0044306	CC	GO:0044306	neuron projection terminus	4/93	129/19518	0.00337835336462257	0.0092301440140581	0.00508023062349259	P2RX3/KCNA6/GRIK5/KCNA1	4
GO:0015250	MF	GO:0015250	water channel activity	4/92	14/18369	5.67576180482562e-07	1.44934631801797e-06	5.76111160640194e-07	AQP10/AQP5/AQP8/MIP	4
GO:0005372	MF	GO:0005372	water transmembrane transporter activity	4/92	17/18369	1.33404164155982e-06	3.34680622356236e-06	1.33034623535052e-06	AQP10/AQP5/AQP8/MIP	4
GO:0030552	MF	GO:0030552	cAMP binding	4/92	19/18369	2.15598336135779e-06	5.31561414955454e-06	2.11294195123994e-06	HCN1/HCN4/CNGB1/HCN2	4
GO:0001614	MF	GO:0001614	purinergic nucleotide receptor activity	4/92	20/18369	2.68466632704199e-06	6.39845474611674e-06	2.54336809930294e-06	P2RX3/P2RX5/P2RX7/P2RX1	4
GO:0016502	MF	GO:0016502	nucleotide receptor activity	4/92	20/18369	2.68466632704199e-06	6.39845474611674e-06	2.54336809930294e-06	P2RX3/P2RX5/P2RX7/P2RX1	4
GO:0005242	MF	GO:0005242	inward rectifier potassium channel activity	4/92	27/18369	9.46724143662842e-06	2.21936971383256e-05	8.82193334905841e-06	KCNJ10/KCNJ6/KCNJ8/KCNH6	4
GO:0030551	MF	GO:0030551	cyclic nucleotide binding	4/92	33/18369	2.15726650428603e-05	4.74598630942927e-05	1.8865164571894e-05	HCN1/HCN4/CNGB1/HCN2	4
GO:0043177	MF	GO:0043177	organic acid binding	4/92	212/18369	0.0219103117271001	0.0372996973449442	0.0148265267326241	GLRA1/GRIN2B/GLRA2/P2RX1	4
GO:0060075	BP	GO:0060075	regulation of resting membrane potential	3/93	10/18614	1.41255356136203e-05	0.000194367370043415	0.000148095089170167	NALCN/KCNJ10/KCNK3	3
GO:0086015	BP	GO:0086015	SA node cell action potential	3/93	12/18614	2.57095877894736e-05	0.000319666199984781	0.000243564515900277	HCN1/HCN4/HCN2	3
GO:0086018	BP	GO:0086018	SA node cell to atrial cardiac muscle cell signaling	3/93	12/18614	2.57095877894736e-05	0.000319666199984781	0.000243564515900277	HCN1/HCN4/HCN2	3
GO:0010524	BP	GO:0010524	positive regulation of calcium ion transport into cytosol	3/93	13/18614	3.33014635901674e-05	0.000404318946177091	0.000308064313335666	P2RX3/P2RX5/P2RX7	3
GO:0071468	BP	GO:0071468	cellular response to acidic pH	3/93	17/18614	7.80384828759322e-05	0.000885007849757824	0.000674317486504584	AQP10/SCNN1D/PKD2L1	3
GO:0010522	BP	GO:0010522	regulation of calcium ion transport into cytosol	3/93	18/18614	9.33074926254189e-05	0.00102439715307907	0.000780522922633684	P2RX3/P2RX5/P2RX7	3
GO:0071294	BP	GO:0071294	cellular response to zinc ion	3/93	20/18614	0.000129415139925628	0.00130937670983577	0.000997658509024194	GLRA1/KCNK3/GLRA2	3
GO:0050908	BP	GO:0050908	detection of light stimulus involved in visual perception	3/93	22/18614	0.00017356258830097	0.00164689290170437	0.00125482353893631	GJA10/CNGB1/CACNA1F	3
GO:0050962	BP	GO:0050962	detection of light stimulus involved in sensory perception	3/93	22/18614	0.00017356258830097	0.00164689290170437	0.00125482353893631	GJA10/CNGB1/CACNA1F	3
GO:0098719	BP	GO:0098719	sodium ion import across plasma membrane	3/93	25/18614	0.00025641793484587	0.00234179919257467	0.00178429620242073	SCNN1D/HCN4/HCN2	3
GO:0007274	BP	GO:0007274	neuromuscular synaptic transmission	3/93	26/18614	0.000288817128393955	0.00254751518378258	0.00194103819082577	P2RX3/CHRNB4/CHRNA1	3
GO:0001964	BP	GO:0001964	startle response	3/93	27/18614	0.000323746310614034	0.00278421827128069	0.00212139029849722	GLRA1/GRID2/KCNA1	3
GO:0062149	BP	GO:0062149	detection of stimulus involved in sensory perception of pain	3/93	27/18614	0.000323746310614034	0.00278421827128069	0.00212139029849722	SCN1A/SCN9A/KCNA1	3
GO:0071467	BP	GO:0071467	cellular response to pH	3/93	27/18614	0.000323746310614034	0.00278421827128069	0.00212139029849722	AQP10/SCNN1D/PKD2L1	3
GO:0050951	BP	GO:0050951	sensory perception of temperature stimulus	3/93	28/18614	0.000361287166599766	0.00305613406500785	0.0023285721609148	TRPM8/GRIK2/SCN9A	3
GO:0060402	BP	GO:0060402	calcium ion transport into cytosol	3/93	28/18614	0.000361287166599766	0.00305613406500785	0.0023285721609148	P2RX3/P2RX5/P2RX7	3
GO:0099625	BP	GO:0099625	ventricular cardiac muscle cell membrane repolarization	3/93	29/18614	0.000401520011058247	0.00336885082448871	0.00256684166247763	KCNQ1/KCNJ8/KCNH6	3
GO:0010447	BP	GO:0010447	response to acidic pH	3/93	30/18614	0.000444523802027724	0.00369958519106944	0.00281883938976833	AQP10/SCNN1D/PKD2L1	3
GO:0086011	BP	GO:0086011	membrane repolarization during action potential	3/93	31/18614	0.000490376154484687	0.00398478890888344	0.00303614577206847	KCNQ1/KCNJ8/KCNH6	3
GO:0098901	BP	GO:0098901	regulation of cardiac muscle cell action potential	3/93	31/18614	0.000490376154484687	0.00398478890888344	0.00303614577206847	HCN1/HCN4/HCN2	3
GO:0007628	BP	GO:0007628	adult walking behavior	3/93	32/18614	0.000539153353841133	0.00424737603942023	0.00323621980971737	KCNJ10/GLRA1/SCN1A	3
GO:0070633	BP	GO:0070633	transepithelial transport	3/93	34/18614	0.000645780867299081	0.00497347653024367	0.00378946039177073	CLCN7/CLCNKB/AQP8	3
GO:0090659	BP	GO:0090659	walking behavior	3/93	34/18614	0.000645780867299081	0.00497347653024367	0.00378946039177073	KCNJ10/GLRA1/SCN1A	3
GO:0099622	BP	GO:0099622	cardiac muscle cell membrane repolarization	3/93	40/18614	0.00104339143427014	0.00781343900452832	0.0059533240885176	KCNQ1/KCNJ8/KCNH6	3
GO:1901381	BP	GO:1901381	positive regulation of potassium ion transmembrane transport	3/93	41/18614	0.00112171226324936	0.00803893788662044	0.00612513933221692	KCNK3/KCNQ1/KCNA1	3
GO:0043268	BP	GO:0043268	positive regulation of potassium ion transport	3/93	48/18614	0.00177466665970831	0.0122097066187931	0.00930298943720775	KCNK3/KCNQ1/KCNA1	3
GO:0086009	BP	GO:0086009	membrane repolarization	3/93	52/18614	0.00223517617435643	0.014874437808092	0.0113333384767898	KCNQ1/KCNJ8/KCNH6	3
GO:0009584	BP	GO:0009584	detection of visible light	3/93	53/18614	0.00236078019350407	0.0155179946477465	0.011823686252414	GJA10/CNGB1/CACNA1F	3
GO:0009409	BP	GO:0009409	response to cold	3/93	54/18614	0.00249067693820367	0.0160648662514137	0.012240366268672	P2RX3/TRPM8/SCN9A	3
GO:0019755	BP	GO:0019755	one-carbon compound transport	3/93	55/18614	0.00262491559788173	0.016825545944186	0.0128199539170817	AQP10/AQP5/AQP8	3
GO:0050909	BP	GO:0050909	sensory perception of taste	3/93	67/18614	0.00459097140606475	0.0267676976895979	0.0203952164158809	P2RX3/SCNN1D/PKD2L1	3
GO:0009583	BP	GO:0009583	detection of light stimulus	3/93	69/18614	0.004985303736577	0.0289035587424015	0.0220226013673745	GJA10/CNGB1/CACNA1F	3
GO:0032732	BP	GO:0032732	positive regulation of interleukin-1 production	3/93	74/18614	0.00605853583340074	0.0339804835873346	0.0258908825374734	PANX3/P2RX7/PANX2	3
GO:0055117	BP	GO:0055117	regulation of cardiac muscle contraction	3/93	78/18614	0.00700911406717919	0.0383664649319592	0.0292327104285736	HCN4/KCNQ1/SCN10A	3
GO:0008344	BP	GO:0008344	adult locomotory behavior	3/93	81/18614	0.00777691987946705	0.0418009443521354	0.0318495567432121	KCNJ10/GLRA1/SCN1A	3
GO:0033268	CC	GO:0033268	node of Ranvier	3/93	16/19518	5.60688200283008e-05	0.000204250701531667	0.000112418686773535	KCNQ3/SCN1A/SCN2A	3
GO:0032809	CC	GO:0032809	neuronal cell body membrane	3/93	29/19518	0.00034979333832268	0.00118929735029711	0.00065458402493133	KCNC3/KCNC4/KCND2	3
GO:0044298	CC	GO:0044298	cell body membrane	3/93	32/19518	0.000469930840701077	0.00156303083972315	0.000860285291901284	KCNC3/KCNC4/KCND2	3
GO:0014704	CC	GO:0014704	intercalated disc	3/93	50/19518	0.00174550211495945	0.00534123647177592	0.00293979303572118	GJC1/SCN1A/SCN2A	3
GO:0030315	CC	GO:0030315	T-tubule	3/93	52/19518	0.001954677192994	0.005864031578982	0.00322753716077441	SCN1A/SCN2A/CACNA1S	3
GO:0044291	CC	GO:0044291	cell-cell contact zone	3/93	72/19518	0.00492574826772357	0.0132217453502054	0.00727719042322965	GJC1/SCN1A/SCN2A	3
GO:0035579	CC	GO:0035579	specific granule membrane	3/93	91/19518	0.0094039712745188	0.0239801267500229	0.0131985561747632	CHRNB4/TRPM2/P2RX1	3
GO:0005247	MF	GO:0005247	voltage-gated chloride channel activity	3/92	11/18369	1.94862659024092e-05	4.35396253756955e-05	1.7306880900166e-05	CLCN7/CLCN1/CLCNKB	3
GO:0008503	MF	GO:0008503	benzodiazepine receptor activity	3/92	11/18369	1.94862659024092e-05	4.35396253756955e-05	1.7306880900166e-05	GABRA6/GABRA3/GABRG3	3
GO:0016594	MF	GO:0016594	glycine binding	3/92	11/18369	1.94862659024092e-05	4.35396253756955e-05	1.7306880900166e-05	GLRA1/GRIN2B/GLRA2	3
GO:0005243	MF	GO:0005243	gap junction channel activity	3/92	12/18369	2.5887410649083e-05	5.60893897396799e-05	2.22953775925117e-05	GJC1/GJA3/GJB7	3
GO:0015271	MF	GO:0015271	outward rectifier potassium channel activity	3/92	14/18369	4.25217155687912e-05	9.07553033781664e-05	3.60749825721088e-05	KCNQ1/KCND2/KCNT1	3
GO:0008308	MF	GO:0008308	voltage-gated monoatomic anion channel activity	3/92	17/18369	7.85752738514175e-05	0.000165239178834599	6.56821174609372e-05	CLCN7/CLCN1/CLCNKB	3
GO:0022829	MF	GO:0022829	wide pore channel activity	3/92	19/18369	0.000111159718420965	0.000230374488901421	9.15732234131523e-05	GJC1/GJA3/GJB7	3
GO:0005227	MF	GO:0005227	calcium activated cation channel activity	3/92	24/18369	0.000228011362497107	0.000465794640529804	0.000185152083832237	CATSPER4/PKD2L1/TRPM5	3
GO:0050997	MF	GO:0050997	quaternary ammonium group binding	3/92	53/18369	0.00237637471948159	0.00453095446514491	0.00180104189265973	CHRNA4/CHRNA2/CHRNA1	3
GO:0016597	MF	GO:0016597	amino acid binding	3/92	55/18369	0.0026422152835324	0.00497153665190965	0.00197617209571676	GLRA1/GRIN2B/GLRA2	3
GO:0030165	MF	GO:0030165	PDZ domain binding	3/92	83/18369	0.00836836106670164	0.0145936052748577	0.00580091781260448	GRIA1/GRID2/GRIK5	3
GO:0001540	MF	GO:0001540	amyloid-beta binding	3/92	85/18369	0.00893162768980173	0.0153882260197789	0.00611677736524152	GRIA1/GRIN2B/GRIA4	3
GO:0044325	MF	GO:0044325	transmembrane transporter binding	3/92	129/18369	0.0270218283832802	0.0449316448698729	0.0178602048065744	KCNQ1/SCN10A/KCNG4	3
GO:0010496	BP	GO:0010496	intercellular transport	2/93	10/18614	0.00108267614113135	0.00781343900452832	0.0059533240885176	GJA3/MIP	2
GO:0051967	BP	GO:0051967	negative regulation of synaptic transmission, glutamatergic	2/93	10/18614	0.00108267614113135	0.00781343900452832	0.0059533240885176	HCN1/GRIK2	2
GO:0070294	BP	GO:0070294	renal sodium ion absorption	2/93	10/18614	0.00108267614113135	0.00781343900452832	0.0059533240885176	KCNQ1/CLCNKB	2
GO:0098976	BP	GO:0098976	excitatory chemical synaptic transmission	2/93	10/18614	0.00108267614113135	0.00781343900452832	0.0059533240885176	GRIN2C/GRIN2B	2
GO:0034776	BP	GO:0034776	response to histamine	2/93	11/18614	0.00131897033544977	0.00925971011009635	0.00705528707899019	GABRB1/GABRB3	2
GO:0071918	BP	GO:0071918	urea transmembrane transport	2/93	11/18614	0.00131897033544977	0.00925971011009635	0.00705528707899019	AQP10/AQP8	2
GO:0015840	BP	GO:0015840	urea transport	2/93	12/18614	0.00157762248498183	0.0109268886208137	0.00832556691120754	AQP10/AQP8	2
GO:0086067	BP	GO:0086067	AV node cell to bundle of His cell communication	2/93	12/18614	0.00157762248498183	0.0109268886208137	0.00832556691120754	GJC1/SCN10A	2
GO:0003096	BP	GO:0003096	renal sodium ion transport	2/93	13/18614	0.00185840812523486	0.0127011734122012	0.00967745465005536	KCNQ1/CLCNKB	2
GO:0071361	BP	GO:0071361	cellular response to ethanol	2/93	14/18614	0.00216110443463617	0.0145668564413432	0.0110989818050626	GLRA1/GLRA2	2
GO:0071415	BP	GO:0071415	cellular response to purine-containing compound	2/93	14/18614	0.00216110443463617	0.0145668564413432	0.0110989818050626	CACNA1S/TRPM2	2
GO:0050966	BP	GO:0050966	detection of mechanical stimulus involved in sensory perception of pain	2/93	15/18614	0.00248549022400725	0.0160648662514137	0.012240366268672	SCN1A/KCNA1	2
GO:0051969	BP	GO:0051969	regulation of transmission of nerve impulse	2/93	17/18614	0.00319845358519686	0.0202503319013691	0.0154294144536135	GLRA1/CHRNB4	2
GO:0098915	BP	GO:0098915	membrane repolarization during ventricular cardiac muscle cell action potential	2/93	17/18614	0.00319845358519686	0.0202503319013691	0.0154294144536135	KCNQ1/KCNJ8	2
GO:0050884	BP	GO:0050884	neuromuscular process controlling posture	2/93	18/18614	0.00358659684676829	0.0220369575193485	0.0167907050866517	GLRA1/SCN1A	2
GO:0071318	BP	GO:0071318	cellular response to ATP	2/93	18/18614	0.00358659684676829	0.0220369575193485	0.0167907050866517	P2RX3/P2RX7	2
GO:0048266	BP	GO:0048266	behavioral response to pain	2/93	19/18614	0.00399556094719731	0.023697809755791	0.0180561647160096	P2RX3/SCN9A	2
GO:0086014	BP	GO:0086014	atrial cardiac muscle cell action potential	2/93	19/18614	0.00399556094719731	0.023697809755791	0.0180561647160096	GJC1/KCNQ1	2
GO:0086026	BP	GO:0086026	atrial cardiac muscle cell to AV node cell signaling	2/93	19/18614	0.00399556094719731	0.023697809755791	0.0180561647160096	GJC1/KCNQ1	2
GO:0086066	BP	GO:0086066	atrial cardiac muscle cell to AV node cell communication	2/93	19/18614	0.00399556094719731	0.023697809755791	0.0180561647160096	GJC1/KCNQ1	2
GO:1903818	BP	GO:1903818	positive regulation of voltage-gated potassium channel activity	2/93	19/18614	0.00399556094719731	0.023697809755791	0.0180561647160096	KCNK3/KCNA1	2
GO:0007635	BP	GO:0007635	chemosensory behavior	2/93	20/18614	0.00442513270356083	0.0259473690345158	0.0197701802007174	P2RX3/SCN9A	2
GO:0050961	BP	GO:0050961	detection of temperature stimulus involved in sensory perception	2/93	22/18614	0.00534525429499057	0.0306461246246126	0.0233503213939062	GRIK2/SCN9A	2
GO:0086012	BP	GO:0086012	membrane depolarization during cardiac muscle cell action potential	2/93	22/18614	0.00534525429499057	0.0306461246246126	0.0233503213939062	HCN4/HCN2	2
GO:0048169	BP	GO:0048169	regulation of long-term neuronal synaptic plasticity	2/93	23/18614	0.00583538557657335	0.0329077481695284	0.025073529052058	KCNJ10/GRIK2	2
GO:0060307	BP	GO:0060307	regulation of ventricular cardiac muscle cell membrane repolarization	2/93	24/18614	0.00634528738711088	0.0353964139648564	0.0269697278985595	KCNQ1/KCNH6	2
GO:0016048	BP	GO:0016048	detection of temperature stimulus	2/93	25/18614	0.00687475429600349	0.0379398204998695	0.028907635570586	GRIK2/SCN9A	2
GO:0086010	BP	GO:0086010	membrane depolarization during action potential	2/93	25/18614	0.00687475429600349	0.0379398204998695	0.028907635570586	HCN4/HCN2	2
GO:0086013	BP	GO:0086013	membrane repolarization during cardiac muscle cell action potential	2/93	26/18614	0.00742358239330429	0.0401106650779582	0.0305616756560943	KCNQ1/KCNJ8	2
GO:0099623	BP	GO:0099623	regulation of cardiac muscle cell membrane repolarization	2/93	29/18614	0.00918421732059376	0.0488562488394472	0.0372252324388689	KCNQ1/KCNH6	2
GO:1901018	BP	GO:1901018	positive regulation of potassium ion transmembrane transporter activity	2/93	29/18614	0.00918421732059376	0.0488562488394472	0.0372252324388689	KCNK3/KCNA1	2
GO:0033270	CC	GO:0033270	paranode region of axon	2/93	11/19518	0.00120124904897364	0.00382898134360346	0.00210745447188357	SCN2A/KCNA1	2
GO:0032591	CC	GO:0032591	dendritic spine membrane	2/93	15/19518	0.00226501564061048	0.00651130973042375	0.00358379620525559	KCNC3/GRIA1	2
GO:0032281	CC	GO:0032281	AMPA glutamate receptor complex	2/93	26/19518	0.00677620841572647	0.01757220148485	0.00967166232396284	GRIA1/GRIA4	2
GO:0043195	CC	GO:0043195	terminal bouton	2/93	47/19518	0.0211290100227702	0.0497344389766744	0.0273736162238318	P2RX3/GRIK5	2
GO:0097546	CC	GO:0097546	ciliary base	2/93	47/19518	0.0211290100227702	0.0497344389766744	0.0273736162238318	KCNJ10/KCNQ1	2
GO:0015279	MF	GO:0015279	store-operated calcium channel activity	2/92	10/18369	0.00108777913189732	0.00219087909663826	0.000870868393216535	TRPC6/TRPC1	2
GO:0042166	MF	GO:0042166	acetylcholine binding	2/92	11/18369	0.00132517754656286	0.00263194984942345	0.00104619279991804	CHRNA4/CHRNA1	2
GO:0070679	MF	GO:0070679	inositol 1,4,5 trisphosphate binding	2/92	12/18369	0.00158503557374561	0.0031049326992551	0.00123420217710545	TRPC6/TRPC1	2
GO:1902282	MF	GO:1902282	voltage-gated potassium channel activity involved in ventricular cardiac muscle cell action potential repolarization	2/92	13/18369	0.00186712721572795	0.00360809718714996	0.00143420867210967	KCNQ1/KCNJ8	2
GO:0086008	MF	GO:0086008	voltage-gated potassium channel activity involved in cardiac muscle cell action potential repolarization	2/92	16/18369	0.00284456865394677	0.00528277035732972	0.00209988663449249	KCNQ1/KCNJ8	2
GO:0031420	MF	GO:0031420	alkali metal ion binding	2/92	17/18369	0.00321336777129281	0.00581660242145408	0.00231208340639323	KCNA4/SCN9A	2
GO:0042165	MF	GO:0042165	neurotransmitter binding	2/92	17/18369	0.00321336777129281	0.00581660242145408	0.00231208340639323	CHRNA4/CHRNA1	2
GO:0099589	MF	GO:0099589	serotonin receptor activity	2/92	27/18369	0.00802826112116993	0.014173349880584	0.00563386745345258	HTR3C/HTR3A	2
GO:0042887	MF	GO:0042887	amide transmembrane transporter activity	2/92	46/18369	0.0222638054995241	0.0374555786639053	0.0148884891266168	AQP10/AQP8	2
