# Supplementary material for: Integrated Transcriptomics and Machine Learning Identify NALCN and KCNQ1 as Key Ion Channel Genes in Kidney Stone Pathogenesis and Potential Therapeutic Targets
Source: Research Square preprint supplement (doi:10.21203/rs.3.rs-8883107/v1), 2026-02-20
Supplement: Supplementary file 5 [file aff7a547738c38cdad70bd0c.xlsx]

## Sheet: Supplementary table 8
	Supplementary Table 6: Results of the GSEA for the KCNQ1
ID	Description	setSize	enrichmentScore	NES	pvalue	p.adjust	qvalue	rank	leading_edge	core_enrichment
KEGG_SPLICEOSOME	KEGG_SPLICEOSOME	122	-0.579984	-3.92779	1e-10	0.00000000166363636363636	0.000000000679425837320574	8569	tags=74%, list=27%, signal=54%	PRPF19/ZMAT2/HSPA1L/SNRPC/PPIL1/TRA2A/BUD31/EFTUD2/PUF60/U2AF1/SRSF2/RBM8A/SNRPA1/PRPF8/SNRNP70/PRPF6/DDX5/SNRPG/SF3A1/U2SURP/RBM25/HNRNPM/HNRNPA1L2/PQBP1/PRPF18/TCERG1/WBP11/SNRNP200/SNRPE/HSPA1A/CHERP/SNRPD2/TXNL4A/MAGOHB/HNRNPU/AQR/DHX15/PRPF38B/SF3B3/HNRNPA3/SRSF7/SNRPF/TRA2B/NCBP2/RBMX/HSPA2/SF3B5/SNRPA/SNW1/LSM7/HNRNPK/BCAS2/SRSF5/THOC1/ISY1/DDX42/DDX23/SF3A3/PRPF40B/CCDC12/LSM6/SNRNP40/SRS…
KEGG_PARKINSONS_DISEASE	KEGG_PARKINSONS_DISEASE	98	-0.584152	-3.9108	1e-10	0.00000000166363636363636	0.000000000679425837320574	7483	tags=77%, list=23%, signal=59%	NDUFA7/NDUFS8/COX6B1/CASP3/UBE2L6/COX5A/SDHC/UBB/VDAC1/UQCR10/NDUFV3/UQCRC2/UBE2G2/NDUFC2/COX6A1/NDUFA2/NDUFA3/SLC18A2/NDUFV1/CYC1/UBE2J1/UBA1/SLC25A5/UQCRQ/VDAC2/NDUFS5/COX8A/UQCRFS1/NDUFC1/SDHB/UQCRB/SLC25A6/NDUFB3/COX4I1/NDUFB9/COX7C/NDUFB5/CYCS/UQCR11/NDUFS3/COX7A2/COX6C/PARK7/NDUFB10/SDHA/NDUFS1/NDUFA9/UQCRH/NDUFB1/NDUFS4/SDHD/NDUFA1/NDUFV2/NDUFS6/NDUFB2/NDUFA4/COX7B/NDUFB4/SLC25A4/UBE2L3/ND…
KEGG_RIBOSOME	KEGG_RIBOSOME	87	-0.5843	-3.8255	1e-10	0.00000000166363636363636	0.000000000679425837320574	8268	tags=83%, list=26%, signal=62%	RPL27A/RPS26/RPL19/RPL8/RPS18/RPS15/RPL37/RPL11/RPS11/RPLP0/RPL36/RPL36AL/RPL10/RPL36A/RPL18/RPL30/RPLP2/RPS24/RPL18A/RPL10A/RPL23A/RPL35/RPL22L1/RPL12/RPL7A/RPL3/RPS8/RPL39/RPS16/MRPL13/RPS28/RPL13A/RPS20/RPS15A/RPS25/RPS5/RPS9/RPL13/RPL32/RPL29/RPLP1/RPL27/RPL14/RPS3/RPL24/RPS19/RPL9/RPL26/RPS7/RPL6/RPS13/RPL21/RPL15/RPS10/RPL10L/RPL35A/FAU/UBA52/RPS27A/RPL38/RPL22/RPL4/RPL5/RPS3A/RPL7/RPS29/RP…
KEGG_OXIDATIVE_PHOSPHORYLATION	KEGG_OXIDATIVE_PHOSPHORYLATION	99	-0.538998	-3.58342	1e-10	0.00000000166363636363636	0.000000000679425837320574	6858	tags=71%, list=21%, signal=56%	COX5A/PPA1/SDHC/UQCR10/NDUFV3/ATP6AP1/UQCRC2/NDUFC2/COX6A1/NDUFA2/NDUFA3/ATP6V1H/NDUFA11/NDUFV1/CYC1/UQCRQ/NDUFS5/COX8A/UQCRFS1/ATP6V1E1/NDUFC1/COX11/SDHB/UQCRB/NDUFB3/COX4I1/ATP6V1C2/NDUFB9/COX7C/NDUFB5/UQCR11/NDUFS3/ATP6V1D/ATP6V0A1/COX7A2/COX6C/ATP6V1F/NDUFB10/ATP6V1G1/SDHA/NDUFS1/NDUFA9/ATP6V0C/UQCRH/ATP6V0B/NDUFB1/NDUFS4/SDHD/NDUFA1/NDUFV2/ATP6V1A/NDUFS6/NDUFB2/NDUFA4/COX7B/NDUFB4/NDUFA8/NDU…
KEGG_ALZHEIMERS_DISEASE	KEGG_ALZHEIMERS_DISEASE	143	-0.481078	-3.39654	1e-10	0.00000000166363636363636	0.000000000679425837320574	7558	tags=63%, list=24%, signal=48%	PSEN1/NDUFA7/NDUFS8/COX6B1/PSEN2/CASP3/COX5A/SDHC/UQCR10/GSK3B/NDUFV3/UQCRC2/NDUFC2/PLCB2/GRIN2A/COX6A1/BACE2/NDUFA2/NDUFA3/FADD/NDUFV1/ADAM10/CYC1/ATF6/PLCB4/GAPDH/BID/HSD17B10/UQCRQ/NDUFS5/COX8A/UQCRFS1/NDUFC1/SDHB/UQCRB/NDUFB3/GNAQ/COX4I1/NDUFB9/COX7C/NDUFB5/APOE/APP/CYCS/UQCR11/NDUFS3/COX7A2/LRP1/COX6C/IDE/MAPK1/NDUFB10/SDHA/NDUFS1/NDUFA9/ITPR2/UQCRH/NDUFB1/NDUFS4/CAPN2/SDHD/NDUFA1/EIF2AK3/ND…
KEGG_HUNTINGTONS_DISEASE	KEGG_HUNTINGTONS_DISEASE	158	-0.458538	-3.20214	1e-10	0.00000000166363636363636	0.000000000679425837320574	7483	tags=67%, list=23%, signal=52%	NDUFA7/AP2B1/TP53/NDUFS8/COX6B1/CASP3/COX5A/TFAM/SDHC/REST/GPX1/VDAC1/UQCR10/CREBBP/NDUFV3/POLR2L/UQCRC2/NDUFC2/PLCB2/COX6A1/NDUFA2/NDUFA3/SIN3A/POLR2I/NDUFV1/CYC1/EP300/SLC25A5/PLCB4/UQCRQ/VDAC2/CREB1/TAF4B/POLR2J/NDUFS5/COX8A/CREB3/UQCRFS1/NDUFC1/SDHB/UQCRB/HDAC1/SLC25A6/NDUFB3/GNAQ/COX4I1/DLG4/NDUFB9/COX7C/NDUFB5/CREB3L4/CYCS/CLTA/UQCR11/POLR2D/NDUFS3/COX7A2/AP2S1/COX6C/TBP/AP2M1/HDAC2/NDUFB10…
KEGG_FOCAL_ADHESION	KEGG_FOCAL_ADHESION	196	-0.406913	-3.03648	1e-10	0.00000000166363636363636	0.000000000679425837320574	6450	tags=46%, list=20%, signal=37%	GSK3B/FLNC/SOS2/PDPK1/ARHGAP5/ACTB/ITGA8/THBS2/RAP1B/SHC1/VEGFA/CRKL/TLN2/TLN1/COL4A4/IGF1R/FLNB/MYL12B/GRB2/LAMA4/ITGA10/PRKCB/SHC2/AKT2/VEGFC/BIRC2/MAPK9/MYL5/JUN/ACTN1/PDGFD/MAPK1/ROCK2/MYL12A/CAPN2/COL6A6/LAMB2/CCND2/PTEN/AKT1/ILK/CTNNB1/TNC/PPP1CC/CCND3/ITGAV/CAV2/PDGFRB/VEGFB/COL6A2/IGF1/ITGB5/RAF1/PIP5K1C/LAMC3/PIK3CA/CAV3/ITGB1/RAC1/MAPK10/MAP2K1/DOCK1/PIK3R1/ROCK1/AKT3/ITGA7/VWF/ITGA9/IT…
KEGG_LYSOSOME	KEGG_LYSOSOME	117	-0.431486	-2.91751	1e-10	0.00000000166363636363636	0.000000000679425837320574	7233	tags=50%, list=23%, signal=39%	SLC11A2/CTSC/FUCA1/LAPTM4B/TPP1/HEXA/ATP6AP1/CD164/GGA3/NEU1/ATP6V1H/CTSZ/LAMP2/SMPD1/SLC17A5/PPT2/GNPTG/GNS/MFSD8/ASAH1/SGSH/SCARB2/CD63/GGA2/CTSG/AP4S1/LIPA/MCOLN1/CLTA/CTSB/GM2A/ATP6V0A1/CTSA/AP3B1/ATP6V0C/ATP6V0B/M6PR/PSAP/IGF2R/NPC2/NAGLU/CLN5/LAMP1/HGSNAT/MANBA/AP1M1/AP3M2/AP3S1/GUSB/AP3S2/GLB1/LAPTM4A/AP4E1/ARSB/CTSF/HEXB/GALC/CTSO/CTSK
KEGG_UBIQUITIN_MEDIATED_PROTEOLYSIS	KEGG_UBIQUITIN_MEDIATED_PROTEOLYSIS	130	-0.414128	-2.86978	1e-10	0.00000000166363636363636	0.000000000679425837320574	6669	tags=52%, list=21%, signal=41%	SMURF1/TRAF6/UBE2D2/UBE3B/ANAPC4/HUWE1/UBE2W/SIAH1/WWP1/UBE2G2/DDB2/UBE2O/FBXW7/KLHL13/STUB1/ITCH/UBE2J1/UBA1/UBE2A/SKP2/CUL5/FBXW8/UBE2D3/UBE3C/ANAPC13/MAP3K1/KEAP1/KLHL9/UBE2E1/ANAPC11/TRIM32/UBE4A/BIRC2/UBR5/UBE2Q1/UBE2NL/CUL1/UBE2K/BRCA1/DET1/UBA2/UBE2E3/RBX1/BIRC6/UBE3A/UBE2Q2/FANCL/ANAPC5/UBE2L3/CUL4B/UBE2G1/RCHY1/CDC16/PIAS1/UBE2B/SKP1/UBE2E2/SYVN1/PIAS3/HERC1/CDC26/UBE4B/UBE2R2/FBXW11/SAE…
KEGG_OLFACTORY_TRANSDUCTION	KEGG_OLFACTORY_TRANSDUCTION	373	0.422182426080421	2.27309071257702	1e-10	0.00000000166363636363636	0.000000000679425837320574	15314	tags=79%, list=48%, signal=42%	OR10X1/OR5B3/OR51B4/OR52N4/OR9G4/OR13J1/OR2M4/OR1B1/OR8B4/OR52J3/OR5J2/OR2AE1/OR4L1/OR2L2/OR5M3/OR52B2/OR4A47/OR4X1/OR14A16/OR5A2/OR8D4/OR8I2/OR51V1/OR10A2/OR6C3/OR4N5/OR56A1/GUCA1C/OR6K3/OR52K1/OR8K5/OR5D18/OR2AK2/OR4C46/OR51B2/OR51I1/PDC/OR6C74/CALML5/OR51D1/OR52W1/OR52D1/OR51A7/OR13C5/OR2T33/OR11H4/OR2A2/OR6V1/OR51L1/OR2T6/OR4A16/OR10AD1/OR10V1/GUCY2D/OR9I1/OR51F1/OR1J2/OR6Q1/OR2K2/OR6C70/OR8J…
KEGG_REGULATION_OF_ACTIN_CYTOSKELETON	KEGG_REGULATION_OF_ACTIN_CYTOSKELETON	210	-0.301262	-2.21723	1e-10	0.00000000166363636363636	0.000000000679425837320574	3846	tags=27%, list=12%, signal=24%	IQGAP1/MYL5/ABI2/ACTN1/PDGFD/MAPK1/ROCK2/MYL12A/BDKRB2/PIP4K2A/RRAS/PPP1CC/ITGAV/LIMK1/PDGFRB/WASL/PIP4K2B/TMSB4X/ITGB5/RAF1/PIP5K1C/MYH10/FGD1/PIK3CA/PIKFYVE/MSN/BRK1/ITGB1/RAC1/FGFR1/MAP2K1/DOCK1/PIK3R1/ROCK1/ITGA7/ITGA9/ITGB8/MYL9/GSN/FGF13/NCKAP1/VAV3/PPP1CB/PDGFRA/ITGA1/ARHGEF6/FN1/ITGAE/PDGFC/GNG12/FGF2/CFL2/MRAS/DIAPH2/RRAS2/PPP1R12A/FGF7
KEGG_INSULIN_SIGNALING_PATHWAY	KEGG_INSULIN_SIGNALING_PATHWAY	136	-0.360783	-2.50451	0.000000000211837737465397	0.00000000323052549634731	0.00000000131934029474063	6629	tags=40%, list=21%, signal=32%	KRAS/GSK3B/SORBS1/SOS2/EIF4E/PDPK1/SHC1/GYS1/CRKL/PHKB/PYGL/INSR/GRB2/HK1/PHKA2/SHC2/EIF4E2/PRKAR2A/AKT2/MAPK9/SOCS4/PDE3B/PRKAG1/PRKAG2/MAPK1/IRS1/PPP1R3D/TRIP10/PRKAR1A/AKT1/PPP1CC/FOXO1/PPP1R3C/RAF1/PIK3CA/PPARGC1A/CALM2/MAPK10/MAP2K1/CALM3/CALM1/PPP1R3B/PIK3R1/RHEB/IRS2/PRKX/AKT3/PPP1CB/SLC2A4/PRKAA1/RHOQ/CBLB/TSC1/PRKAB2
KEGG_ENDOCYTOSIS	KEGG_ENDOCYTOSIS	176	-0.311344	-2.33217	0.000000000678894395599597	0.00000000955674418420971	0.00000000390295563462117	7458	tags=44%, list=23%, signal=34%	AP2B1/PLD2/FLT1/ARRB2/RAB11FIP4/CHMP3/ADRB2/PARD6G/PDCD6IP/SMURF1/EPN3/TRAF6/WWP1/VPS28/HSPA1A/ITCH/CHMP2A/SH3GL1/IGF1R/ARRB1/RAB11FIP5/PLD1/RAB11A/VPS25/ARFGAP3/HSPA2/RAB5A/CHMP4C/GRK4/RUFY1/SMAP2/ARF6/SNF8/CXCR4/CSF1R/VPS37C/VPS4B/ERBB4/CLTA/RNF41/TSG101/AP2S1/GIT2/PARD3/CHMP5/AP2M1/VPS4A/CHMP2B/GRK5/CHMP4A/CHMP1B/ACAP2/USP8/ARAP3/RAB4A/PIP4K2B/RABEP1/VPS45/RAB5B/PIP5K1C/EPN1/PIKFYVE/VPS36/SH3K…
KEGG_PROSTATE_CANCER	KEGG_PROSTATE_CANCER	89	-0.411461	-2.69159	0.00000000151458588816337	0.0000000197978012524211	0.0000000080853833127518	7405	tags=52%, list=23%, signal=40%	TP53/NFKBIA/E2F3/MAP2K2/KRAS/GSK3B/SOS2/CREBBP/AR/PDPK1/NFKB1/CHUK/ATF4/EP300/CREB1/IGF1R/CREB3/GRB2/GSTP1/AKT2/CREB3L4/LEF1/PDGFD/MAPK1/HSP90B1/PTEN/HSP90AA1/HSP90AB1/AKT1/CTNNB1/PDGFRB/FOXO1/IGF1/RAF1/PIK3CA/CREB5/FGFR1/MAP2K1/CREB3L1/PIK3R1/AKT3/PDGFRA/PDGFC/CDKN1B/RB1/BCL2
KEGG_WNT_SIGNALING_PATHWAY	KEGG_WNT_SIGNALING_PATHWAY	149	-0.324806	-2.26633	0.00000000182254321601176	0.0000000222350272353435	0.00000000908074163767265	7405	tags=46%, list=23%, signal=36%	TP53/WNT4/DKK1/WNT11/SENP2/NFATC3/BTRC/CACYBP/DAAM1/PPP2R5E/GSK3B/CREBBP/SIAH1/PPP2CA/FZD6/CHD8/PLCB2/WNT2B/EP300/PLCB4/NFAT5/NFATC4/SMAD2/PRKCB/TBL1Y/MAPK9/MAP3K7/LEF1/JUN/CSNK2A2/CUL1/DVL3/PPP2CB/FZD4/CSNK2B/ROCK2/SFRP4/DVL2/RBX1/AXIN2/CCND2/CTNNB1/FRAT2/CCND3/FZD2/PPP3CC/DAAM2/PPP3R1/SKP1/CAMK2G/DKK2/CSNK2A1/PPP2R5D/FZD7/PPP2R5A/RAC1/MAPK10/PRKX/WNT5A/ROCK1/SMAD4/FBXW11/NLK/TBL1X/PPP3CB/PRICKL…
KEGG_CHRONIC_MYELOID_LEUKEMIA	KEGG_CHRONIC_MYELOID_LEUKEMIA	73	-0.454088	-2.84892	0.00000000267356190378828	0.0000000305788642745785	0.0000000124883483663795	7405	tags=48%, list=23%, signal=37%	TP53/NFKBIA/E2F3/MAP2K2/KRAS/SOS2/NFKB1/CHUK/SHC1/CRKL/TGFBR1/GRB2/SHC2/HDAC1/AKT2/MAPK1/CDK6/HDAC2/STAT5A/ABL1/TGFB2/AKT1/CDK4/RAF1/PIK3CA/GAB2/MAP2K1/PIK3R1/AKT3/STAT5B/TGFB3/SMAD4/CDKN1B/RB1/CBLB
KEGG_NEUROTROPHIN_SIGNALING_PATHWAY	KEGG_NEUROTROPHIN_SIGNALING_PATHWAY	125	-0.350394	-2.43186	0.00000000284226418844205	0.0000000305961380285233	0.0000000124954029337081	8180	tags=51%, list=25%, signal=38%	PIK3CB/PLCG1/PIK3CG/NTRK3/MAPK14/CAMK2D/MAPKAPK2/PSEN1/TP53/NFKBIA/ZNF274/MAP2K2/KRAS/TRAF6/YWHAG/GSK3B/RPS6KA3/SOS2/IRAK4/PDPK1/NFKB1/IRAK3/RAP1B/SHC1/ATF4/SH2B3/CRKL/YWHAB/GRB2/SHC2/MAPK7/MAP3K1/AKT2/NTRK2/MAPK9/MAP3K5/JUN/MAP2K7/MAPK1/IRS1/GAB1/ABL1/MAP2K5/AKT1/MAP3K3/FOXO3/RAF1/PIK3CA/CAMK2G/CALM2/RAC1/MAPK10/MAP2K1/CALM3/CALM1/PIK3R1/IRS2/AKT3/YWHAQ/YWHAH/MAGED1/KIDINS220/BCL2/RAP1A
KEGG_RENAL_CELL_CARCINOMA	KEGG_RENAL_CELL_CARCINOMA	66	-0.468259	-2.89807	0.00000000389140945379992	0.0000000395626627802992	0.0000000161573141064207	9271	tags=67%, list=29%, signal=47%	CDC42/MET/FH/HGF/HRAS/NRAS/PIK3R2/EGLN2/PIK3CB/PIK3CG/PAK3/SLC2A1/MAP2K2/KRAS/SOS2/HIF1A/CREBBP/RAP1B/VEGFA/EP300/CRKL/ETS1/GRB2/EPAS1/AKT2/VEGFC/JUN/MAPK1/ARNT2/GAB1/RBX1/TGFB2/AKT1/VEGFB/ARNT/RAF1/PIK3CA/RAC1/MAP2K1/EGLN1/PIK3R1/AKT3/TGFB3/RAP1A
KEGG_PROTEIN_EXPORT	KEGG_PROTEIN_EXPORT	22	-0.736248	-3.25775	0.00000000548570615817787	0.0000000528360119445553	0.0000000215781239462952	6594	tags=86%, list=21%, signal=69%	SRP68/SEC61A2/SRP72/SRPRB/OXA1L/SPCS2/SEC63/SEC11C/SRP54/SEC61B/SRP9/SPCS3/IMMP1L/HSPA5/SEC11A/SEC61G/IMMP2L/SRP14/SRP19
KEGG_VALINE_LEUCINE_AND_ISOLEUCINE_DEGRADATION	KEGG_VALINE_LEUCINE_AND_ISOLEUCINE_DEGRADATION	43	-0.543693	-2.89827	0.00000000601014979470044	0.000000054992870621509	0.0000000224589808117753	6739	tags=65%, list=21%, signal=52%	ACAT2/HMGCS1/DLD/ECHS1/BCAT1/ACAA1/HSD17B10/ACADM/ALDH7A1/PCCB/HMGCL/ACAA2/HADHB/MCEE/PCCA/ALDH6A1/ALDH9A1/AOX1/ACADSB/AUH/HADHA/ACAT1/ACAD8/ALDH3A2/ALDH2/OXCT1/ALDH1B1/HIBADH
KEGG_RNA_DEGRADATION	KEGG_RNA_DEGRADATION	50	-0.522372	-2.93931	0.00000000980409813802496	0.0000000854357123456461	0.000000034891777834575	6135	tags=70%, list=19%, signal=57%	EDC3/EXOSC4/MPHOSPH6/C1D/EXOSC10/EXOSC2/CNOT6/ENO1/CNOT7/DCPS/CNOT1/DDX6/LSM7/CNOT4/CNOT6L/EXOSC7/LSM6/EXOSC8/HSPD1/CNOT10/CNOT2/HSPA9/XRN2/LSM5/PAPOLG/LSM2/PAPOLA/LSM1/XRN1/PARN/EXOSC3/ENO2/DCP2/CNOT8/DCP1B
KEGG_COLORECTAL_CANCER	KEGG_COLORECTAL_CANCER	62	-0.452813	-2.75268	0.0000000259541889248924	0.000000215891662420695	0.0000000881697327113568	8524	tags=56%, list=27%, signal=42%	MSH3/TCF7L2/PIK3CB/PIK3CG/CASP9/TP53/MSH2/CASP3/KRAS/GSK3B/APPL1/TGFBR1/SMAD2/AKT2/CYCS/MAPK9/LEF1/JUN/MAPK1/MSH6/MLH1/AXIN2/TGFB2/AKT1/CTNNB1/RAF1/PIK3CA/RAC1/MAPK10/MAP2K1/PIK3R1/AKT3/TGFB3/SMAD4/BCL2
KEGG_FC_GAMMA_R_MEDIATED_PHAGOCYTOSIS	KEGG_FC_GAMMA_R_MEDIATED_PHAGOCYTOSIS	91	-0.376225	-2.51398	0.0000000508713346044775	0.000000404758879679104	0.000000165302734870385	5716	tags=35%, list=18%, signal=29%	SYK/MARCKSL1/CRKL/ARPC3/PLD1/PRKCB/ARF6/AKT2/MAPK1/AMPH/AKT1/LIMK1/WASL/PIP4K2B/PRKCE/RAF1/PIP5K1C/PIK3CA/PIKFYVE/DNM3/RAC1/GAB2/MAP2K1/PIK3R1/AKT3/ASAP1/GSN/VAV3/ASAP2/PLA2G4A/WASF3/CFL2
KEGG_VASOPRESSIN_REGULATED_WATER_REABSORPTION	KEGG_VASOPRESSIN_REGULATED_WATER_REABSORPTION	44	-0.518536	-2.77786	0.0000000766323536364656	0.00000058432169647805	0.000000238635838078467	5383	tags=50%, list=17%, signal=42%	CREB1/CREB3/RAB11A/RAB5A/DYNC2H1/DYNLL1/CREB3L4/DYNC1LI2/DCTN6/DCTN2/DYNC1H1/DYNC2LI1/DCTN4/ADCY3/ADCY9/RAB5B/CREB5/DYNC1LI1/DYNC1I2/CREB3L1/PRKX/STX4
KEGG_CELL_CYCLE	KEGG_CELL_CYCLE	124	-0.331536	-2.28049	0.0000000801370163685678	0.000000586602959817916	0.000000239567501564982	6789	tags=44%, list=21%, signal=34%	PTTG1/TFDP2/YWHAG/GSK3B/ANAPC4/ORC3/CREBBP/CDK7/EP300/SKP2/ORC2/ATM/ORC4/SMAD2/YWHAB/HDAC1/ANAPC13/ATR/ANAPC11/CDC14A/CUL1/CDK6/HDAC2/PCNA/CDC25B/SMC1A/CCNH/RBX1/CCND2/ABL1/TGFB2/MCM3/ANAPC5/RBL2/MCM6/CCND3/CDK4/CDKN2C/CDC16/BUB3/SKP1/PRKDC/SMC3/CDC26/STAG1/YWHAQ/TGFB3/YWHAH/SMAD4/RAD21/CDKN1C/CDKN1B/RB1/STAG2
KEGG_SNARE_INTERACTIONS_IN_VESICULAR_TRANSPORT	KEGG_SNARE_INTERACTIONS_IN_VESICULAR_TRANSPORT	38	-0.540658	-2.84945	0.000000163214618717995	0.00000114877981636128	0.000000469159430322983	5693	tags=63%, list=18%, signal=52%	STX10/USE1/VAMP8/SNAP25/GOSR1/STX8/SNAP29/STX12/STX5/SNAP23/VTI1B/VAMP7/STX3/STX6/STX16/VAMP3/STX7/SEC22B/STX17/VAMP1/STX18/STX4/VAMP4/STX2
KEGG_SMALL_CELL_LUNG_CANCER	KEGG_SMALL_CELL_LUNG_CANCER	84	-0.370741	-2.41165	0.000000198791435556881	0.00000134736417432997	0.000000550260893744193	8681	tags=57%, list=27%, signal=42%	PIAS2/RXRG/XIAP/CDK2/MAX/PIK3CB/PIK3CG/COL4A1/CASP9/TRAF3/TRAF4/TP53/NFKBIA/E2F3/RXRB/TRAF6/NFKB1/CHUK/SKP2/COL4A4/LAMA4/AKT2/CYCS/BIRC2/CKS1B/CDK6/TRAF5/RARB/LAMB2/PTEN/AKT1/ITGAV/CDK4/PIAS1/TRAF1/LAMC3/PIK3CA/PIAS3/ITGB1/PIK3R1/AKT3/FN1/LAMA2/CDKN1B/RB1/LAMC1/BCL2/COL4A2
KEGG_NUCLEOTIDE_EXCISION_REPAIR	KEGG_NUCLEOTIDE_EXCISION_REPAIR	43	-0.49603	-2.64419	0.000000210598570855499	0.0000013764120880913	0.000000562124004915054	7310	tags=65%, list=23%, signal=50%	POLD2/LIG1/RFC2/RPA3/DDB2/GTF2H3/GTF2H1/CDK7/RFC5/RAD23B/ERCC3/RFC4/RPA2/PCNA/POLE3/MNAT1/CCNH/RBX1/POLD3/GTF2H5/CUL4B/POLE4/XPA/ERCC6/RFC1/ERCC5/ERCC8/CETN2
KEGG_LYSINE_DEGRADATION	KEGG_LYSINE_DEGRADATION	39	-0.527014	-2.75935	0.000000233395278901665	0.00000143382187264328	0.000000585570048649254	6217	tags=56%, list=19%, signal=46%	ACAT2/OGDH/AASS/SETMAR/ECHS1/ALDH7A1/EHMT1/PLOD2/OGDHL/ALDH9A1/DLST/HADHA/SETD2/AADAT/ACAT1/AASDHPPT/SETD7/PLOD1/ALDH3A2/SETDB2/ALDH2/ALDH1B1
KEGG_PANCREATIC_CANCER	KEGG_PANCREATIC_CANCER	69	-0.413589	-2.57172	0.000000235052766007095	0.00000143382187264328	0.000000585570048649254	6174	tags=42%, list=19%, signal=34%	NFKB1/CHUK/VEGFA/TGFBR1/PLD1/SMAD2/AKT2/VEGFC/MAPK9/MAPK1/CDK6/RALB/TGFB2/AKT1/CDK4/RALA/VEGFB/RAF1/PIK3CA/JAK1/RAC1/MAPK10/MAP2K1/PIK3R1/AKT3/TGFB3/SMAD4/ARHGEF6/RB1
KEGG_CITRATE_CYCLE_TCA_CYCLE	KEGG_CITRATE_CYCLE_TCA_CYCLE	30	-0.57687	-2.81082	0.000000276939297087758	0.00000163483520538902	0.000000667663500619043	6692	tags=67%, list=21%, signal=53%	SUCLA2/PCK1/DLD/SDHC/ACO2/OGDH/ACLY/DLAT/MDH2/SDHB/SDHA/MDH1/SDHD/OGDHL/SUCLG1/DLST/ACO1/CS/PDHA1/PDHB
KEGG_PURINE_METABOLISM	KEGG_PURINE_METABOLISM	147	-0.296566	-2.11953	0.000000349083730009003	0.00000199632258098899	0.000000815294237849975	7316	tags=46%, list=23%, signal=36%	GART/POLD2/HPRT1/POLR3A/POLR3F/NME1/NT5M/APRT/ATIC/PRIM1/NT5E/POLR2L/ADA/GUK1/NME2/PDE2A/PDE7B/POLR2I/ADCY4/POLA2/PDE4D/POLA1/POLR3K/POLR1B/POLR2J/AK4/ADCY7/DGUOK/PDE8B/GMPS/POLR1D/RRM1/NME5/NME6/DCK/PAPSS1/POLR2D/GMPR2/PAICS/NME4/PDE3B/PDE8A/ADK/POLR2A/POLE3/RRM2B/POLR2B/PDE6D/POLD3/POLR2C/NUDT5/NME7/PAPSS2/AK2/NUDT9/POLR3C/POLE4/ADCY3/NUDT2/POLR2E/ADCY9/POLR2K/POLR2G/ENPP1/GUCY1A2/POLR3B/POLR3G…
KEGG_NEUROACTIVE_LIGAND_RECEPTOR_INTERACTION	KEGG_NEUROACTIVE_LIGAND_RECEPTOR_INTERACTION	270	0.337670556735316	1.77350052918337	0.000000513268843281374	0.0000028463090400149	0.00000116242704539003	14350	tags=60%, list=45%, signal=33%	TACR3/HTR2C/DRD1/HTR5A/GRIK2/LPAR4/GRPR/RXFP2/MC4R/GRIA3/CHRNB4/GABRB3/GABRG1/GPR50/GABRB2/THRB/HRH1/CHRNA9/NTSR2/NPBWR1/DRD3/GRM5/GLRA1/GABRA6/GRID2/TBXA2R/ADORA1/GABRB1/TAAR9/GABRG2/GRIN2B/OPRD1/GABRD/MC3R/GPR35/LEPR/SSTR5/PTH2R/NPBWR2/GRIK4/PRSS2/MC5R/NTSR1/HRH3/CHRM1/CHRNA1/SSTR3/CYSLTR2/GABRR1/NPY2R/PTGER1/GRIA1/GH1/F2RL2/TAAR8/CHRNA10/CHRNA6/GCGR/MCHR2/F2/HTR6/HTR1D/GABRA1/LHB/MC1R/CCKBR/GA…
KEGG_ECM_RECEPTOR_INTERACTION	KEGG_ECM_RECEPTOR_INTERACTION	84	-0.360404	-2.34441	0.000000540612203505655	0.00000290976568357455	0.00000118834261451707	3002	tags=29%, list=9%, signal=26%	DAG1/COL6A6/LAMB2/TNC/ITGAV/COL6A2/ITGB5/LAMC3/ITGB1/ITGA7/VWF/ITGA9/ITGB8/COL1A1/COL6A1/ITGA1/FN1/LAMA2/LAMC1/COL3A1/COL1A2/COL5A1/COL5A2/COL4A2
KEGG_PROTEASOME	KEGG_PROTEASOME	43	-0.463426	-2.47039	0.00000154572724727621	0.00000808194532147274	0.00000330065066335671	7932	tags=65%, list=25%, signal=49%	POMP/PSME1/PSMC6/PSMB3/PSMA6/PSMB8/PSMD13/PSMB2/PSMD11/PSMB1/PSMB6/PSMA5/PSMA3/PSMA7/PSMC3/PSMA2/PSMB4/PSMC1/PSMD8/PSMD2/PSMD4/PSMA4/PSMD7/PSMC5/PSMD1/PSMD6/PSMB5/PSMC4
KEGG_NON_SMALL_CELL_LUNG_CANCER	KEGG_NON_SMALL_CELL_LUNG_CANCER	54	-0.430633	-2.49514	0.00000183754434886775	0.00000928414447965129	0.00000379162644840519	9069	tags=63%, list=28%, signal=45%	RASSF5/HRAS/NRAS/PIK3R2/PRKCA/RXRG/PIK3CB/PLCG1/PIK3CG/CASP9/TP53/E2F3/RXRB/MAP2K2/KRAS/SOS2/PDPK1/GRB2/PRKCB/AKT2/MAPK1/CDK6/RARB/AKT1/CDK4/FOXO3/RAF1/PIK3CA/RASSF1/MAP2K1/PIK3R1/AKT3/RB1/STK4
KEGG_VASCULAR_SMOOTH_MUSCLE_CONTRACTION	KEGG_VASCULAR_SMOOTH_MUSCLE_CONTRACTION	111	-0.313212	-2.12156	0.00000187712210790764	0.00000928414447965129	0.00000379162644840519	3510	tags=27%, list=11%, signal=24%	MAPK1/ROCK2/ITPR2/PPP1R12B/KCNMA1/ACTA2/ITPR1/MYL6B/PPP1CC/ADCY3/PRKCE/RAF1/ADCY9/CALM2/MAP2K1/CALM3/CALM1/MYL6/PRKX/RAMP1/ROCK1/PRKG1/PPP1R14A/MYL9/PPP1CB/PLA2G4A/EDNRA/GUCY1A2/CALD1/PPP1R12A
KEGG_PYRIMIDINE_METABOLISM	KEGG_PYRIMIDINE_METABOLISM	93	-0.333433	-2.22979	0.0000022130057803101	0.0000106573699420197	0.00000435244904160712	6890	tags=51%, list=21%, signal=40%	POLD2/POLR3A/POLR3F/NME1/DHODH/NT5M/TYMS/PRIM1/NT5E/POLR2L/NME2/UCKL1/POLR2I/POLA2/POLA1/POLR3K/POLR1B/POLR2J/AK3/UPRT/POLR1D/RRM1/NME5/NME6/DCK/POLR2D/NME4/DPYD/POLR2A/POLE3/RRM2B/POLR2B/POLD3/TK2/POLR2C/NME7/POLR3C/DUT/POLE4/NUDT2/POLR2E/POLR2K/POLR2G/DCTD/CMPK1/POLR3B/POLR3GL
KEGG_N_GLYCAN_BIOSYNTHESIS	KEGG_N_GLYCAN_BIOSYNTHESIS	46	-0.442838	-2.42887	0.00000394468639689504	0.0000185096823238921	0.00000755931806152625	7896	tags=63%, list=25%, signal=48%	DOLPP1/ALG14/TUSC3/B4GALT3/DPM1/STT3B/RPN2/ALG10B/ST6GAL1/MGAT4A/RPN1/FUT8/ALG2/MGAT2/MAN2A1/STT3A/ALG5/B4GALT2/ALG6/MAN1A2/DPAGT1/GANAB/ALG8/MAN2A2/DAD1/ALG13/ALG11/MAN1C1/ALG9
KEGG_BASAL_TRANSCRIPTION_FACTORS	KEGG_BASAL_TRANSCRIPTION_FACTORS	33	-0.515251	-2.56598	0.00000467601440400649	0.0000213927658983297	0.00000873676375485424	7612	tags=67%, list=24%, signal=51%	TBPL1/GTF2IRD1/TAF2/GTF2H3/GTF2F1/GTF2H1/TAF6/TAF4B/TAF1/GTF2B/GTF2E2/TAF13/TAF9B/TAF11/TBP/TAF7/GTF2A1/TAF12/GTF2F2/GTF2E1/TAF4/STON1
KEGG_MTOR_SIGNALING_PATHWAY	KEGG_MTOR_SIGNALING_PATHWAY	51	-0.425939	-2.40727	0.00000498208179378358	0.0000222370967868877	0.00000908158683847584	6425	tags=45%, list=20%, signal=36%	RPS6KA3/HIF1A/EIF4E/ULK3/PDPK1/VEGFA/EIF4E2/AKT2/VEGFC/MAPK1/AKT1/RICTOR/VEGFB/EIF4B/IGF1/PIK3CA/PIK3R1/RHEB/AKT3/ULK1/PRKAA1/DDIT4/TSC1
KEGG_GLIOMA	KEGG_GLIOMA	65	-0.360838	-2.21451	0.0000104767239433747	0.0000456485828961326	0.0000186427919794387	8180	tags=51%, list=25%, signal=38%	PIK3CB/PLCG1/PIK3CG/CAMK2D/TP53/E2F3/MAP2K2/KRAS/SOS2/SHC1/IGF1R/GRB2/PRKCB/SHC2/AKT2/MAPK1/CDK6/PTEN/AKT1/CDK4/PDGFRB/IGF1/RAF1/PIK3CA/CAMK2G/CALM2/MAP2K1/CALM3/CALM1/PIK3R1/AKT3/PDGFRA/RB1
KEGG_TIGHT_JUNCTION	KEGG_TIGHT_JUNCTION	126	-0.287539	-2.00335	0.0000116821228268029	0.0000497169413326727	0.0000203043016083967	6712	tags=43%, list=21%, signal=34%	PARD6G/CTNNA1/KRAS/CLDN18/PPP2CA/ACTB/AMOTL1/GNAI2/PRKCH/MYH11/MYH9/MAGI3/SPTAN1/LLGL1/MYL12B/CLDN10/PRKCB/MYH7/HCLS1/PPP2R2A/AKT2/CLDN11/YES1/MAGI2/MYL5/CSNK2A2/PARD3/ACTN1/TJP1/PPP2CB/CSNK2B/MYL12A/CLDN20/CASK/JAM2/PTEN/AKT1/RRAS/CTNNB1/MYH6/CDK4/EPB41L3/PRKCE/MYH10/RAB13/CSNK2A1/EPB41L2/AKT3/JAM3/MYL9/MPDZ/GNAI1/MRAS/RRAS2
KEGG_ADHERENS_JUNCTION	KEGG_ADHERENS_JUNCTION	68	-0.36071	-2.23736	0.0000119749984540015	0.0000498051072064155	0.0000203403083788064	6712	tags=49%, list=21%, signal=38%	CTNNA1/SORBS1/CREBBP/PTPRB/ACTB/EP300/IGF1R/TGFBR1/SSX2IP/SMAD2/INSR/ACP1/MAP3K7/YES1/IQGAP1/LEF1/CSNK2A2/PARD3/ACTN1/TJP1/PTPRM/MAPK1/CSNK2B/CTNNB1/WASL/CSNK2A1/RAC1/FGFR1/SMAD4/NLK/FER/FYN/WASF3
KEGG_TGF_BETA_SIGNALING_PATHWAY	KEGG_TGF_BETA_SIGNALING_PATHWAY	85	-0.331832	-2.14965	0.000017216259865286	0.0000700127901188296	0.0000285930865598901	6342	tags=42%, list=20%, signal=34%	CREBBP/ID1/PPP2CA/THBS2/FST/EP300/BMP4/TGFBR1/SMAD2/SMAD7/BMPR2/SMAD1/ID3/CUL1/PPP2CB/MAPK1/ROCK2/ID2/RBX1/TGFB2/ZFYVE16/RBL2/SP1/ACVRL1/SKP1/ACVR1/ID4/ACVR2B/LTBP1/ROCK1/TGFB3/SMAD4/BMPR1A/DCN/BMP8A/SMAD6
KEGG_PEROXISOME	KEGG_PEROXISOME	78	-0.340872	-2.17634	0.0000201409325164648	0.0000801258837068055	0.0000327232542029519	6204	tags=41%, list=19%, signal=33%	FAR2/CRAT/GSTK1/PEX13/ACOX1/ACAA1/HSD17B4/ACOX2/PECR/PEX14/PRDX1/PEX19/NUDT19/HMGCL/ECH1/PEX1/EPHX2/BAAT/PHYH/MPV17/ABCD4/CAT/AMACR/SOD1/ECI2/SCP2/PEX12/AGPS/HACL1/SLC25A17/GNPAT/PEX11B
KEGG_PROPANOATE_METABOLISM	KEGG_PROPANOATE_METABOLISM	31	-0.49687	-2.45639	0.0000215564110283716	0.0000839324088977023	0.0000342778316464588	8074	tags=74%, list=25%, signal=56%	HIBCH/SUCLA2/ACACA/LDHA/ACSS1/ACAT2/ECHS1/ACADM/ALDH7A1/PCCB/MCEE/PCCA/LDHB/ACSS2/ALDH6A1/SUCLG1/ALDH9A1/ACSS3/HADHA/ACAT1/ALDH3A2/ALDH2/ALDH1B1
KEGG_VIBRIO_CHOLERAE_INFECTION	KEGG_VIBRIO_CHOLERAE_INFECTION	52	-0.39586	-2.25987	0.0000253615844144894	0.0000966910405802409	0.0000394884318734375	6299	tags=52%, list=20%, signal=42%	ATP6AP1/ACTB/ATP6V1H/SEC61A2/ATP6V1E1/PRKCB/ATP6V1C2/ARF1/ATP6V1D/ATP6V0A1/KDELR2/TJP1/ATP6V1F/SEC61B/ATP6V1G1/ATP6V0C/ATP6V0B/SLC12A2/KDELR1/ATP6V1A/SEC61G/ADCY3/ADCY9/ATP6V0E1/PRKX/ATP6V1B2/ATP6V1C1
KEGG_GLYCOLYSIS_GLUCONEOGENESIS	KEGG_GLYCOLYSIS_GLUCONEOGENESIS	60	-0.370382	-2.21557	0.0000272325209696567	0.000101705129335657	0.000041536175915051	8133	tags=55%, list=25%, signal=41%	ALDOA/ADH1A/PCK1/LDHA/ACSS1/GALM/DLD/PFKL/ENO1/PGM2/GAPDH/DLAT/ALDH7A1/HK1/GPI/PGAM1/AKR1A1/TPI1/LDHB/PFKM/PGAM4/ADH1B/ACSS2/ALDH9A1/ADH5/PGK1/PDHA1/ALDH3A2/PDHB/ALDH2/ENO2/ALDH1B1/PGM1
KEGG_OOCYTE_MEIOSIS	KEGG_OOCYTE_MEIOSIS	110	-0.29389	-1.97917	0.0000311379063465737	0.00011396473722846	0.000046542975802247	3618	tags=29%, list=11%, signal=26%	CUL1/PPP2CB/MAPK1/ITPR2/SMC1A/RBX1/ANAPC5/ITPR1/PPP1CC/CDC16/ADCY3/IGF1/PPP3CC/PPP3R1/SKP1/ADCY9/CAMK2G/CALM2/PPP2R5D/PPP2R5A/SMC3/MAP2K1/CALM3/CALM1/CDC26/PRKX/YWHAQ/PPP1CB/YWHAH/FBXW11/CPEB1/PPP3CB
KEGG_HYPERTROPHIC_CARDIOMYOPATHY_HCM	KEGG_HYPERTROPHIC_CARDIOMYOPATHY_HCM	83	-0.319223	-2.07529	0.0000318465409983215	0.000114272882405742	0.0000466688216900067	4755	tags=33%, list=15%, signal=28%	ITGA10/TPM4/MYH7/SGCA/TPM1/PRKAG1/PRKAG2/DAG1/TGFB2/MYH6/ITGAV/CACNA2D3/IGF1/ATP2A2/ITGB5/ITGB1/ITGA7/ITGA9/ITGB8/TGFB3/PRKAA1/ITGA1/SLC8A1/LAMA2/TPM2/PRKAB2/SGCB
KEGG_ACUTE_MYELOID_LEUKEMIA	KEGG_ACUTE_MYELOID_LEUKEMIA	57	-0.384164	-2.27544	0.0000400474358134598	0.000140936168343522	0.0000575580555213694	6989	tags=37%, list=22%, signal=29%	MAP2K2/KRAS/SOS2/NFKB1/CHUK/PIM2/RUNX1T1/GRB2/AKT2/LEF1/MAPK1/STAT5A/AKT1/RAF1/ZBTB16/PIK3CA/MAP2K1/PIK3R1/AKT3/STAT5B/KIT
KEGG_FATTY_ACID_METABOLISM	KEGG_FATTY_ACID_METABOLISM	42	-0.433412	-2.26955	0.0000411889601581989	0.000142218485074536	0.0000580817511664771	5799	tags=43%, list=18%, signal=35%	ACOX1/ECHS1/ACAA1/ACADM/ALDH7A1/ACAA2/HADHB/CPT1A/ADH1B/ECI2/ALDH9A1/ADH5/ACADSB/HADHA/ACAT1/ALDH3A2/ALDH2/ALDH1B1
KEGG_AMINOACYL_TRNA_BIOSYNTHESIS	KEGG_AMINOACYL_TRNA_BIOSYNTHESIS	22	-0.564573	-2.49812	0.0000709833913543468	0.000240554826256397	0.0000982421205878873	7389	tags=68%, list=23%, signal=53%	VARS2/PSTK/AARS2/EARS2/WARS2/SARS2/LARS2/RARS2/SEPSECS/FARS2/CARS2/IARS2/HARS2/NARS2/MTFMT
KEGG_ERBB_SIGNALING_PATHWAY	KEGG_ERBB_SIGNALING_PATHWAY	86	-0.303448	-1.97842	0.000102516771047576	0.000341101256394663	0.000139305086016802	8984	tags=51%, list=28%, signal=37%	NRG2/BTC/HRAS/NRAS/PIK3R2/PRKCA/NRG1/PIK3CB/PLCG1/PIK3CG/PAK3/MAP2K4/CAMK2D/MAP2K2/KRAS/GSK3B/SOS2/ABL2/SHC1/CRKL/GRB2/PRKCB/SHC2/AKT2/ERBB4/MAPK9/JUN/MAP2K7/MAPK1/STAT5A/GAB1/ABL1/AKT1/NCK1/RAF1/PIK3CA/CAMK2G/MAPK10/MAP2K1/PIK3R1/AKT3/STAT5B/CDKN1B/CBLB
KEGG_MELANOMA	KEGG_MELANOMA	71	-0.313749	-1.9307	0.00011773464754582	0.000384740008944376	0.000157127067213406	3577	tags=32%, list=11%, signal=29%	AKT2/FGF14/PDGFD/MAPK1/CDK6/PTEN/AKT1/MITF/CDK4/PDGFRB/IGF1/RAF1/PIK3CA/FGFR1/MAP2K1/PIK3R1/AKT3/FGF13/PDGFRA/PDGFC/RB1/FGF2/FGF7
KEGG_MAPK_SIGNALING_PATHWAY	KEGG_MAPK_SIGNALING_PATHWAY	264	-0.201467	-1.53994	0.00012738726673386	0.000408980172145549	0.000167026702458061	6629	tags=31%, list=21%, signal=25%	KRAS/CACNA2D2/TRAF6/JMJD7-PLA2G4B/RPS6KA3/FLNC/SOS2/NFKB1/HSPA1A/CHUK/RAP1B/ATF4/DUSP10/ATF2/CRKL/FLNB/ARRB1/NFATC4/TGFBR1/HSPA2/ECSIT/PPP5C/GRB2/PRKCB/MAPK7/MAPK8IP3/MAP3K1/AKT2/NTRK2/FGF14/MAPK9/RASGRP1/MAP3K7/RASA1/MAP3K5/JUN/DDIT3/MAP2K7/DAXX/MAPK1/MEF2C/CDC25B/IL1R1/TGFB2/MAP2K5/AKT1/RRAS/MAP3K3/PDGFRB/CACNA2D3/MAP3K2/PPP3CC/PPP3R1/RAF1/RAPGEF2/MAP3K13/PPM1A/RAC1/TAOK1/MAPK10/FGFR1/MAP2K1/DU…
KEGG_AMINO_SUGAR_AND_NUCLEOTIDE_SUGAR_METABOLISM	KEGG_AMINO_SUGAR_AND_NUCLEOTIDE_SUGAR_METABOLISM	42	-0.412057	-2.15773	0.000170190124809712	0.000536979186899609	0.000219301249754802	6418	tags=52%, list=20%, signal=42%	GMPPA/HEXA/PMM2/UXS1/PGM2/MPI/UAP1/HK1/UGDH/GPI/GNPNAT1/NANS/GNE/UGP2/CMAS/GFPT2/CYB5R3/GNPDA2/PMM1/GFPT1/HEXB/PGM1
KEGG_BASE_EXCISION_REPAIR	KEGG_BASE_EXCISION_REPAIR	33	-0.442555	-2.20395	0.000174621338080358	0.000541622116418736	0.000221197413090194	7310	tags=58%, list=23%, signal=45%	POLD2/MPG/LIG1/SMUG1/MUTYH/PARP3/MBD4/APEX1/XRCC1/PCNA/POLE3/POLD3/POLE4/UNG/POLL/NEIL1/PARP4/HMGB1/PARP2
KEGG_CHEMOKINE_SIGNALING_PATHWAY	KEGG_CHEMOKINE_SIGNALING_PATHWAY	182	-0.221203	-1.62908	0.000198277726857794	0.000604747066916272	0.000246977519419358	6629	tags=31%, list=21%, signal=25%	KRAS/CCL5/GNB5/GSK3B/SOS2/NFKB1/PLCB2/CHUK/RAP1B/SHC1/ADCY4/CCL14/GNAI2/CRKL/PLCB4/GNG5/ARRB1/ADCY7/GRK4/GRB2/PRKCB/SHC2/GNG10/CXCR4/AKT2/CXCR5/GSK3A/PARD3/ELMO1/MAPK1/ROCK2/JAK2/GRK5/AKT1/GNB1/GNB4/WASL/STAT2/FOXO3/ADCY3/RAF1/ADCY9/GNG11/PIK3CA/RAC1/MAP2K1/PIK3R1/PRKX/ROCK1/AKT3/STAT5B/VAV3/CXCL12/CCL21/GNAI1/GNG12/RAP1A
KEGG_TRYPTOPHAN_METABOLISM	KEGG_TRYPTOPHAN_METABOLISM	38	-0.414809	-2.18618	0.000209011937224716	0.000627035811674148	0.000256080199188177	6739	tags=53%, list=21%, signal=42%	ACAT2/AFMID/OGDH/ECHS1/WARS2/ALDH7A1/CYP1B1/CAT/HAAO/OGDHL/ALDH9A1/AOX1/HADHA/AADAT/INMT/ACAT1/ALDH3A2/ALDH2/ALDH1B1/MAOB
KEGG_MELANOGENESIS	KEGG_MELANOGENESIS	101	-0.274206	-1.83009	0.000235301688152812	0.000694519498902655	0.000283640405073848	6629	tags=40%, list=21%, signal=32%	KRAS/GSK3B/CREBBP/FZD6/PLCB2/WNT2B/ADCY4/EP300/GNAI2/PLCB4/CREB1/ADCY7/CREB3/PRKCB/GNAQ/CREB3L4/LEF1/DVL3/FZD4/MAPK1/DVL2/MITF/CTNNB1/FZD2/ADCY3/RAF1/ADCY9/CAMK2G/CALM2/FZD7/EDNRB/MAP2K1/CREB3L1/CALM3/CALM1/PRKX/WNT5A/GNAI1/KIT/FZD1
KEGG_PYRUVATE_METABOLISM	KEGG_PYRUVATE_METABOLISM	39	-0.414498	-2.17023	0.000251064507287608	0.000729282616406861	0.000297837594276026	7808	tags=64%, list=24%, signal=49%	PCK1/ACACA/LDHA/ACSS1/ME2/ACAT2/DLD/GLO1/DLAT/ALDH7A1/MDH2/LDHB/MDH1/ACSS2/ME1/ALDH9A1/HAGH/GRHPR/PDHA1/ACAT1/ALDH3A2/PDHB/ALDH2/ACYP1/ALDH1B1
KEGG_DILATED_CARDIOMYOPATHY	KEGG_DILATED_CARDIOMYOPATHY	90	-0.283048	-1.86488	0.000281016861039277	0.000803532587034183	0.000328161137068893	6622	tags=38%, list=21%, signal=30%	CACNA2D2/EMD/ACTB/ITGA8/ADCY4/DES/ADCY7/PLN/ITGA10/TPM4/MYH7/SGCA/TPM1/DAG1/TGFB2/MYH6/ITGAV/CACNA2D3/ADCY3/IGF1/ATP2A2/ITGB5/ADCY9/ITGB1/PRKX/ITGA7/ITGA9/ITGB8/TGFB3/ITGA1/SLC8A1/LAMA2/TPM2/SGCB
KEGG_MISMATCH_REPAIR	KEGG_MISMATCH_REPAIR	23	-0.507734	-2.30316	0.000342385865006934	0.000963947896865677	0.000393674435878418	7310	tags=70%, list=23%, signal=54%	POLD2/MSH2/LIG1/RFC2/RPA3/SSBP1/RFC5/RFC4/RPA2/PCNA/MSH6/MLH1/POLD3/MLH3/RFC1/PMS2
KEGG_STARCH_AND_SUCROSE_METABOLISM	KEGG_STARCH_AND_SUCROSE_METABOLISM	38	-0.399094	-2.10336	0.000480579617799765	0.00133251621299026	0.000544197015371344	5711	tags=45%, list=18%, signal=37%	GYS1/UXS1/PGM2/PYGL/HK1/PGM2L1/UGDH/GPI/UGT2B10/AGL/UGT2B11/UGP2/GUSB/ENPP1/GANC/GBE1/PGM1
KEGG_APOPTOSIS	KEGG_APOPTOSIS	86	-0.278553	-1.8161	0.000739216286304857	0.00201905343871327	0.000824577475689629	8180	tags=41%, list=25%, signal=30%	PIK3CB/PIK3CG/CASP9/PRKAR1B/TP53/NFKBIA/ENDOD1/CASP3/TRADD/IRAK4/NFKB1/IRAK3/CHUK/FADD/BID/ATM/PRKAR2A/AKT2/CYCS/BIRC2/PRKAR1A/CAPN2/IL1R1/AKT1/AIFM1/PPP3CC/PPP3R1/PIK3CA/PIK3R1/PRKX/AKT3/CASP6/FAS/PPP3CB/BCL2
KEGG_ENDOMETRIAL_CANCER	KEGG_ENDOMETRIAL_CANCER	52	-0.337544	-1.92696	0.00103082550327244	0.00277413333968906	0.00113295063053163	8922	tags=58%, list=28%, signal=42%	HRAS/NRAS/PIK3R2/TCF7L2/PIK3CB/PIK3CG/CASP9/TP53/MAP2K2/CTNNA1/KRAS/GSK3B/SOS2/PDPK1/GRB2/AKT2/LEF1/MAPK1/MLH1/AXIN2/PTEN/AKT1/ILK/CTNNB1/FOXO3/RAF1/PIK3CA/MAP2K1/PIK3R1/AKT3
KEGG_GLYCOSAMINOGLYCAN_BIOSYNTHESIS_CHONDROITIN_SULFATE	KEGG_GLYCOSAMINOGLYCAN_BIOSYNTHESIS_CHONDROITIN_SULFATE	22	-0.490125	-2.1687	0.00105058485491582	0.0027863337456463	0.00113793325246412	5989	tags=55%, list=19%, signal=44%	B3GAT1/CHSY1/B3GALT6/CHST3/XYLT2/UST/XYLT1/B3GAT3/CSGALNACT1/DSE/CHST7/B3GAT2
KEGG_LONG_TERM_POTENTIATION	KEGG_LONG_TERM_POTENTIATION	69	-0.296391	-1.84297	0.00110382898071384	0.00288572433529475	0.00117852417489748	6629	tags=41%, list=21%, signal=32%	KRAS/RPS6KA3/CREBBP/PLCB2/GRIN2A/RAP1B/ATF4/EP300/PLCB4/PRKCB/GNAQ/MAPK1/ITPR2/ITPR1/PPP1CC/PPP3CC/PPP3R1/RAF1/CAMK2G/CALM2/MAP2K1/CALM3/CALM1/PRKX/PPP1CB/PPP3CB/RAP1A/PPP1R12A
KEGG_PROGESTERONE_MEDIATED_OOCYTE_MATURATION	KEGG_PROGESTERONE_MEDIATED_OOCYTE_MATURATION	85	-0.267963	-1.7359	0.00118062841166493	0.00300076387964836	0.00122550609982763	4545	tags=38%, list=14%, signal=32%	KRAS/ANAPC4/RPS6KA3/ADCY4/GNAI2/IGF1R/ADCY7/ANAPC13/AKT2/ANAPC11/MAPK9/PDE3B/MAPK1/CDC25B/ANAPC5/HSP90AA1/HSP90AB1/AKT1/CDC16/ADCY3/IGF1/RAF1/ADCY9/PIK3CA/MAPK10/MAP2K1/CDC26/PIK3R1/PRKX/AKT3/GNAI1/CPEB1
KEGG_T_CELL_RECEPTOR_SIGNALING_PATHWAY	KEGG_T_CELL_RECEPTOR_SIGNALING_PATHWAY	106	-0.237634	-1.58548	0.00117010689551247	0.00300076387964836	0.00122550609982763	8308	tags=42%, list=26%, signal=31%	CD8A/PIK3CB/PLCG1/PIK3CG/MAPK14/PAK3/CD40LG/NFKBIA/NFATC3/MAP2K2/KRAS/GSK3B/SOS2/PDPK1/NFKB1/CHUK/CD247/CD8B/NFAT5/NFATC4/GRB2/AKT2/MAPK9/RASGRP1/MAP3K7/DLG1/JUN/CD28/MAP2K7/MAPK1/AKT1/CDK4/PPP3CC/NCK1/PPP3R1/RAF1/PIK3CA/MAP2K1/PIK3R1/AKT3/VAV3/FYN/PPP3CB/CBLB
KEGG_B_CELL_RECEPTOR_SIGNALING_PATHWAY	KEGG_B_CELL_RECEPTOR_SIGNALING_PATHWAY	74	-0.273891	-1.73328	0.00120088036241738	0.00301042611400521	0.00122945213744245	7347	tags=36%, list=23%, signal=28%	NFKBIA/NFATC3/MAP2K2/KRAS/GSK3B/SOS2/NFKB1/CHUK/SYK/NFAT5/NFATC4/GRB2/PRKCB/AKT2/JUN/MAPK1/AKT1/PPP3CC/PPP3R1/RAF1/PIK3CA/RAC1/MAP2K1/PIK3R1/AKT3/VAV3/PPP3CB
KEGG_RNA_POLYMERASE	KEGG_RNA_POLYMERASE	27	-0.431662	-2.07402	0.0013338322024245	0.0032985309870768	0.00134711360415561	7211	tags=67%, list=22%, signal=52%	POLR3A/POLR3F/POLR2L/POLR2I/POLR3K/POLR1B/POLR2J/POLR1D/POLR2D/POLR2A/POLR2B/POLR2C/POLR3C/POLR2E/POLR2K/POLR2G/POLR3B/POLR3GL
KEGG_LINOLEIC_ACID_METABOLISM	KEGG_LINOLEIC_ACID_METABOLISM	28	0.494001399148788	1.8122220222549	0.00145965425037386	0.00356155637091221	0.0014545326565129	11065	tags=68%, list=34%, signal=44%	CYP2C18/PLA2G4E/PLA2G3/PLA2G2E/CYP3A43/CYP3A4/PLA2G6/CYP2C9/PLA2G2F/CYP2C19/PLA2G2D/CYP3A5/CYP3A7/PLA2G2C/AKR1B10/ALOX15/PLA2G1B/PLA2G5/CYP2C8
KEGG_GAP_JUNCTION	KEGG_GAP_JUNCTION	86	-0.267688	-1.74527	0.0015559239875699	0.00374650118059594	0.00153006375508951	6989	tags=42%, list=22%, signal=33%	MAP2K2/GNA11/KRAS/SOS2/PLCB2/TUBB4B/ADCY4/TUBB6/GNAI2/PLCB4/ADCY7/GRB2/PRKCB/MAPK7/GNAQ/PDGFD/TJP1/MAPK1/ITPR2/MAP2K5/ITPR1/PDGFRB/MAP3K2/ADCY3/RAF1/ADCY9/GJA1/MAP2K1/PRKX/PRKG1/TUBB/PDGFRA/PDGFC/GNAI1/GUCY1A2/LPAR1
KEGG_PHOSPHATIDYLINOSITOL_SIGNALING_SYSTEM	KEGG_PHOSPHATIDYLINOSITOL_SIGNALING_SYSTEM	76	-0.276532	-1.73978	0.0016131533371164	0.00383385793106885	0.00156574008113827	8320	tags=50%, list=26%, signal=37%	DGKD/ITPR3/PIK3CB/PLCG1/PIK3CG/PLCD1/PLCE1/IPPK/DGKH/DGKE/INPP5E/CDIPT/PLCB2/INPP5B/PLCB4/IMPA1/DGKQ/PI4KB/PRKCB/CDS2/ITPR2/PIK3C3/INPPL1/PTEN/PIP4K2A/ITPKB/ITPR1/OCRL/PIP4K2B/IMPA2/PIK3C2A/PIP5K1C/PIK3CA/PIKFYVE/CALM2/CALM3/CALM1/PIK3R1
KEGG_ARRHYTHMOGENIC_RIGHT_VENTRICULAR_CARDIOMYOPATHY_ARVC	KEGG_ARRHYTHMOGENIC_RIGHT_VENTRICULAR_CARDIOMYOPATHY_ARVC	74	-0.267403	-1.69222	0.00168562776408452	0.00395474206189061	0.0016151089237517	6712	tags=36%, list=21%, signal=29%	CTNNA1/CACNA2D2/EMD/ACTB/ITGA8/DES/DSC2/ITGA10/SGCA/LEF1/CDH2/ACTN1/DAG1/CTNNB1/ITGAV/CACNA2D3/ATP2A2/ITGB5/GJA1/ITGB1/ITGA7/ITGA9/ITGB8/ITGA1/SLC8A1/LAMA2/SGCB
KEGG_ARGININE_AND_PROLINE_METABOLISM	KEGG_ARGININE_AND_PROLINE_METABOLISM	50	-0.324554	-1.82621	0.00202544743841219	0.00469185925606874	0.00191614614426736	5239	tags=38%, list=16%, signal=32%	ALDH18A1/GLS/AMD1/ALDH7A1/GOT2/GLUL/LAP3/ALDH9A1/CPS1/CKB/SMS/CKMT2/ALDH3A2/ALDH2/P4HA1/ALDH1B1/SAT2/OAT/MAOB
KEGG_DNA_REPLICATION	KEGG_DNA_REPLICATION	36	-0.352809	-1.81411	0.00369418406688513	0.00845044605299973	0.00345114564143216	7455	tags=56%, list=23%, signal=43%	RNASEH2B/POLD2/LIG1/RFC2/RPA3/PRIM1/POLA2/SSBP1/POLA1/RFC5/RFC4/RPA2/PCNA/POLE3/POLD3/MCM3/MCM6/POLE4/RNASEH2C/RFC1
KEGG_PATHOGENIC_ESCHERICHIA_COLI_INFECTION	KEGG_PATHOGENIC_ESCHERICHIA_COLI_INFECTION	54	-0.299918	-1.73776	0.0040407439631464	0.00912908821303445	0.0037283017723638	8819	tags=48%, list=27%, signal=35%	PRKCA/ARPC4/LY96/ACTG1/ARPC1B/TUBA1A/TUBA1B/TUBB2B/NCL/ARPC1A/CD14/ACTB/TUBB4B/TUBB6/ARPC3/HCLS1/ROCK2/ABL1/CTNNB1/WASL/NCK1/ITGB1/ROCK1/TUBB/YWHAQ/FYN
KEGG_BASAL_CELL_CARCINOMA	KEGG_BASAL_CELL_CARCINOMA	55	-0.307926	-1.79047	0.00421326490308955	0.00940277411299253	0.00384007455865671	3789	tags=29%, list=12%, signal=26%	LEF1/DVL3/FZD4/SMO/DVL2/AXIN2/CTNNB1/FZD2/HHIP/SUFU/FZD7/WNT5A/PTCH1/GLI1/FZD1/GLI3
KEGG_INOSITOL_PHOSPHATE_METABOLISM	KEGG_INOSITOL_PHOSPHATE_METABOLISM	54	-0.295733	-1.71351	0.00471984576133657	0.0104064069195734	0.00424995623405069	8180	tags=52%, list=25%, signal=39%	PIK3CB/PLCG1/PIK3CG/PLCD1/PLCE1/IPPK/INPP5E/CDIPT/PLCB2/INPP5B/MINPP1/PLCB4/IMPA1/PI4KB/TPI1/PIK3C3/INPPL1/PTEN/PIP4K2A/ITPKB/ALDH6A1/OCRL/PIP4K2B/IMPA2/PIK3C2A/PIP5K1C/PIK3CA/PIKFYVE
KEGG_ADIPOCYTOKINE_SIGNALING_PATHWAY	KEGG_ADIPOCYTOKINE_SIGNALING_PATHWAY	66	-0.27589	-1.70749	0.0054764903304203	0.0119309253627014	0.00487256658470979	7420	tags=35%, list=23%, signal=27%	SLC2A1/NFKBIA/CD36/RXRB/TRADD/NFKB1/CHUK/CAMKK2/AKT2/MAPK9/PRKAG1/PRKAG2/IRS1/CPT1A/JAK2/AKT1/PPARGC1A/MAPK10/IRS2/AKT3/SLC2A4/PRKAA1/PRKAB2
KEGG_EPITHELIAL_CELL_SIGNALING_IN_HELICOBACTER_PYLORI_INFECTION	KEGG_EPITHELIAL_CELL_SIGNALING_IN_HELICOBACTER_PYLORI_INFECTION	66	-0.275104	-1.70263	0.00588214911760002	0.0126639210414212	0.00517192058637277	6597	tags=38%, list=21%, signal=30%	CCL5/ATP6AP1/NFKB1/CHUK/ATP6V1H/ADAM10/ATP6V1E1/ATP6V1C2/MAPK9/ATP6V1D/ATP6V0A1/JUN/TJP1/ATP6V1F/ATP6V1G1/ATP6V0C/ATP6V0B/JAM2/ATP6V1A/ATP6V0E1/RAC1/MAPK10/ATP6V1B2/JAM3/ATP6V1C1
KEGG_PORPHYRIN_AND_CHLOROPHYLL_METABOLISM	KEGG_PORPHYRIN_AND_CHLOROPHYLL_METABOLISM	31	-0.361322	-1.78628	0.007573237483878	0.0160038403742736	0.00653593710999957	7990	tags=55%, list=25%, signal=41%	HMOX2/COX15/UGT2B15/EARS2/BLVRB/UROS/FTH1/HCCS/ALAD/UGT2B10/FECH/UROD/UGT2B11/COX10/BLVRA/GUSB/CPOX
KEGG_MATURITY_ONSET_DIABETES_OF_THE_YOUNG	KEGG_MATURITY_ONSET_DIABETES_OF_THE_YOUNG	25	0.478433086184482	1.69367637544344	0.00760838312875302	0.0160038403742736	0.00653593710999957	13494	tags=68%, list=42%, signal=39%	SLC2A2/PAX6/BHLHA15/HNF4G/NKX6-1/HNF4A/PDX1/NEUROD1/INS/PKLR/FOXA2/PAX4/FOXA3/IAPP/MAFA/HNF1A/NEUROG3
KEGG_CYSTEINE_AND_METHIONINE_METABOLISM	KEGG_CYSTEINE_AND_METHIONINE_METABOLISM	34	-0.32395	-1.63779	0.00951869597340062	0.0197945609446854	0.00808405997740962	6301	tags=53%, list=20%, signal=43%	SRM/LDHA/MAT2A/MAT2B/DNMT3A/AMD1/CTH/ENOPH1/GOT2/DNMT1/LDHB/AHCYL1/CDO1/ADI1/MPST/MTR/BHMT/SMS
KEGG_P53_SIGNALING_PATHWAY	KEGG_P53_SIGNALING_PATHWAY	65	-0.254076	-1.55931	0.0101182225406304	0.0208048845498355	0.008496674161854	5515	tags=32%, list=17%, signal=27%	SIAH1/DDB2/BID/EI24/ATM/ATR/CYCS/CDK6/RRM2B/MDM4/CCND2/PTEN/ZMAT3/CCND3/RCHY1/CDK4/IGF1/SESN3/CCNG2/FAS/SESN1
KEGG_NICOTINATE_AND_NICOTINAMIDE_METABOLISM	KEGG_NICOTINATE_AND_NICOTINAMIDE_METABOLISM	22	-0.411024	-1.8187	0.0114459159337545	0.0232733623986342	0.00950479568767919	9194	tags=68%, list=29%, signal=49%	NAMPT/NNT/CD38/NT5C2/ENPP3/NUDT12/NMNAT1/NNMT/NT5M/QPRT/NT5E/BST1/NADK/AOX1/ENPP1
KEGG_BETA_ALANINE_METABOLISM	KEGG_BETA_ALANINE_METABOLISM	22	-0.405707	-1.79517	0.0127581697177968	0.0256565391028221	0.0104780803928695	5734	tags=50%, list=18%, signal=41%	ECHS1/ACADM/ALDH7A1/DPYD/AOC3/ALDH9A1/HADHA/SMS/ALDH3A2/ALDH2/ALDH1B1
KEGG_LEUKOCYTE_TRANSENDOTHELIAL_MIGRATION	KEGG_LEUKOCYTE_TRANSENDOTHELIAL_MIGRATION	114	-0.2072	-1.39619	0.013897536732787	0.0276440132836958	0.0112897609614173	8180	tags=40%, list=25%, signal=30%	PIK3CB/PLCG1/PIK3CG/MAPK14/CTNND1/CYBA/ITGAM/ITGA4/CLDN5/VCL/ESAM/CYBB/CTNNA1/CLDN18/PECAM1/ARHGAP5/ACTB/RAP1B/GNAI2/RAPGEF4/MYL12B/CLDN10/PRKCB/CXCR4/CLDN11/MYL5/ACTN1/THY1/ROCK2/MYL12A/CLDN20/JAM2/CTNNB1/PIK3CA/MSN/ITGB1/RAC1/PIK3R1/ROCK1/JAM3/MYL9/VAV3/CXCL12/CD99/GNAI1/RAP1A
KEGG_ASCORBATE_AND_ALDARATE_METABOLISM	KEGG_ASCORBATE_AND_ALDARATE_METABOLISM	16	-0.451712	-1.84394	0.0152316867075449	0.0296531773136247	0.0121102996219002	4960	tags=50%, list=15%, signal=42%	ALDH7A1/UGDH/UGT2B10/UGT2B11/ALDH9A1/ALDH3A2/ALDH2/ALDH1B1
KEGG_FC_EPSILON_RI_SIGNALING_PATHWAY	KEGG_FC_EPSILON_RI_SIGNALING_PATHWAY	78	-0.227359	-1.4516	0.0152019380010957	0.0296531773136247	0.0121102996219002	6629	tags=32%, list=21%, signal=25%	KRAS/JMJD7-PLA2G4B/SOS2/PDPK1/SYK/MS4A2/GRB2/PRKCB/AKT2/MAPK9/MAP2K7/MAPK1/AKT1/PRKCE/RAF1/PIK3CA/RAC1/MAPK10/GAB2/MAP2K1/PIK3R1/AKT3/VAV3/PLA2G4A/FYN
KEGG_NON_HOMOLOGOUS_END_JOINING	KEGG_NON_HOMOLOGOUS_END_JOINING	12	-0.507485	-1.81571	0.0171679713248702	0.0330709342363288	0.0135061048649948	5808	tags=58%, list=18%, signal=48%	LIG4/RAD50/XRCC4/XRCC6/NHEJ1/PRKDC/POLL
KEGG_BUTANOATE_METABOLISM	KEGG_BUTANOATE_METABOLISM	34	-0.306518	-1.54966	0.0187221773900537	0.0356891506497898	0.014575379327783	2022	tags=26%, list=6%, signal=25%	ALDH9A1/HADHA/PDHA1/ACAT1/ALDH3A2/PDHB/ALDH2/OXCT1/ALDH1B1
KEGG_OTHER_GLYCAN_DEGRADATION	KEGG_OTHER_GLYCAN_DEGRADATION	15	-0.454207	-1.78542	0.0194699739040385	0.0367320126230829	0.0150012821181414	7763	tags=67%, list=24%, signal=51%	AGA/MAN2C1/FUCA1/HEXA/NEU1/MAN2B2/FUCA2/MANBA/GLB1/HEXB
KEGG_PANTOTHENATE_AND_COA_BIOSYNTHESIS	KEGG_PANTOTHENATE_AND_COA_BIOSYNTHESIS	16	-0.427534	-1.74524	0.0202646546988963	0.0374894361325544	0.0153106123981096	6369	tags=50%, list=20%, signal=40%	COASY/BCAT1/PPCS/PANK1/DPYD/PANK2/ENPP1/PANK3
KEGG_NOTCH_SIGNALING_PATHWAY	KEGG_NOTCH_SIGNALING_PATHWAY	47	-0.288028	-1.61789	0.0202811703667917	0.0374894361325544	0.0153106123981096	8760	tags=62%, list=27%, signal=45%	ADAM17/DTX3/MFNG/JAG2/MAML2/NOTCH4/DTX3L/DVL1/HES1/NOTCH3/PSEN1/DLL1/PSEN2/CREBBP/JAG1/NOTCH2/DTX1/EP300/SNW1/HDAC1/KAT2A/DVL3/HDAC2/DVL2/NUMBL/KAT2B/NCOR2/CIR1/RBPJ
KEGG_CARDIAC_MUSCLE_CONTRACTION	KEGG_CARDIAC_MUSCLE_CONTRACTION	72	-0.235982	-1.47559	0.0225512282884256	0.0412687477678189	0.0168540758787181	7426	tags=46%, list=23%, signal=35%	ATP1A2/COX6B1/ATP1B1/COX5A/CACNA2D2/UQCR10/UQCRC2/COX6A1/CYC1/UQCRQ/COX8A/UQCRFS1/TPM4/MYH7/UQCRB/COX4I1/ATP1B3/COX7C/UQCR11/ATP1B2/TPM1/COX7A2/COX6C/UQCRH/COX7B/MYH6/CACNA2D3/ATP2A2/COX7A2L/SLC9A6/COX7A1/SLC8A1/TPM2
KEGG_GLYCOSAMINOGLYCAN_DEGRADATION	KEGG_GLYCOSAMINOGLYCAN_DEGRADATION	21	-0.391252	-1.72033	0.0229999211164367	0.0416731243990883	0.0170192225040855	2469	tags=52%, list=8%, signal=48%	HS3ST3A1/HEXA/GNS/SGSH/NAGLU/HGSNAT/HPSE2/GUSB/GLB1/ARSB/HEXB
KEGG_VIRAL_MYOCARDITIS	KEGG_VIRAL_MYOCARDITIS	70	-0.230022	-1.41006	0.0232344045614496	0.0416852552426007	0.0170241767168516	6265	tags=27%, list=20%, signal=22%	ABL2/ACTB/BID/MYH11/MYH9/EIF4G2/MYH7/CYCS/SGCA/CD28/DAG1/ABL1/MYH6/MYH10/RAC1/LAMA2/FYN/SGCB/CAV1
KEGG_GLYOXYLATE_AND_DICARBOXYLATE_METABOLISM	KEGG_GLYOXYLATE_AND_DICARBOXYLATE_METABOLISM	16	-0.411518	-1.67986	0.0279518060718071	0.049661946710104	0.0202818419120931	6486	tags=62%, list=20%, signal=50%	MTHFD1/ACO2/AFMID/MDH2/MDH1/HYI/GRHPR/ACO1/CS/MTHFD2
