# Supplementary material for: Integrated Transcriptomics and Machine Learning Identify NALCN and KCNQ1 as Key Ion Channel Genes in Kidney Stone Pathogenesis and Potential Therapeutic Targets
Source: Research Square preprint supplement (doi:10.21203/rs.3.rs-8883107/v1), 2026-02-20
Supplement: Supplementary file 6 [file efd2780ef0f95609228ec90e.xlsx]

## Sheet: Supplementary table 2
	Supplementary Table 2: The list of intersected genes between differentially expressed genes in kidney stones and ion channel-related genes
GJC1
NALCN
GJA10
GABRB1
AQP10
KCNV2
KCNA10
P2RX3
KCNJ10
GABRB3
HCN1
KCNQ4
TRPV5
GLRA1
KCNA6
KCNK10
TRPM3
CLCN7
GABRR2
KCNJ6
KCNQ3
KCNK3
AQP5
SCNN1D
KCNK16
KCNC3
HCN4
PANX3
KCNC4
CHRNA4
CATSPER4
SCN1A
PKD2L1
CNGB1
P2RX5
KCNQ1
GABRR3
CLCN1
SCN10A
KCNV1
GRIA1
GJA3
KCNJ8
GABRA6
SCN2A
KCNK12
KCND2
KCNK9
CHRNB4
KCNH3
CHRNG
CACNA1I
P2RX7
TRPC2
KCNK13
KCNA4
TRPM8
CACNA1S
TRPC6
GRID2
GRIK4
GABRA3
KCNH8
CLCNKB
HTR3C
HCN2
GABRR1
GRIN2C
KCNK15
GRIN2B
KCNT1
TRPM2
GRIK2
TRPC1
AQP8
PANX2
KCNH6
TRPM5
CHRNA2
HTR3A
GABRG3
GJB7
KCNG4
CACNA1F
CHRNA1
GJC3
GLRA2
GRIA4
GRIK5
MIP
SCN9A
KCNA1
P2RX1
TRPM1
